# Supplementary material for: Synthesis of N-oxyamide analogues of protein kinase B (Akt) targeting anionic glycoglycerolipids and their antiproliferative activity on human ovarian carcinoma cells
Source: Royal Society of Chemistry journal article supplement (doi:10.1039/d3ob00891f), 2023-01-01

## SUPPLEMENTARY MATERIAL

# Synthesis of N-Oxamide analogues of protein kinase B (Akt) targeting anionic glycolipids and their Antiproliferative Activity on Human Ovarian Carcinoma Cells.

## TABLE OF CONTENTS

| Page | Content                                                  | Page | Content                                                                                                                                          |
|------|----------------------------------------------------------|------|--------------------------------------------------------------------------------------------------------------------------------------------------|
| S1   | Figure S1: NMR of configuration assignment of <b>17a</b> | S25  | <sup>13</sup> C spectrum of compound <b>11</b>                                                                                                   |
| S2   | Figure S2: TLC of stability studies                      | S26  | <sup>1</sup> H spectrum of compound <b>12</b>                                                                                                    |
| S3   | Figure S3: NMR of stability studies                      | S27  | <sup>13</sup> C spectrum of compound <b>12</b>                                                                                                   |
| S4   | Figure S4: NMR of serum binding study                    | S28  | <sup>1</sup> H spectrum of compound <b>13</b>                                                                                                    |
| S5   | Figure S5: NMR of serum binding study                    | S29  | <sup>13</sup> C spectrum of compound <b>13</b>                                                                                                   |
| S6   | <sup>1</sup> H spectrum of compound <b>3a</b>            | S30  | <sup>1</sup> H spectrum of compound <b>15</b>                                                                                                    |
| S7   | <sup>13</sup> C spectrum of compound <b>3a</b>           | S31  | <sup>13</sup> C spectrum of compound <b>15</b>                                                                                                   |
| S8   | <sup>1</sup> H spectrum of compound <b>3b</b>            | S32  | <sup>1</sup> H spectrum of compound <b>16</b>                                                                                                    |
| S9   | <sup>13</sup> C spectrum of compound <b>3b</b>           | S33  | <sup>13</sup> C spectrum of compound <b>16</b>                                                                                                   |
| S10  | <sup>1</sup> H spectrum of compound <b>4a</b>            | S34  | <sup>1</sup> H spectrum of compound <b>17a</b>                                                                                                   |
| S11  | <sup>13</sup> C spectrum of compound <b>4a</b>           | S35  | <sup>13</sup> C spectrum of compound <b>17a</b>                                                                                                  |
| S12  | <sup>1</sup> H spectrum of compound <b>4b</b>            | S36  | <sup>1</sup> H spectrum of compound <b>17b</b>                                                                                                   |
| S13  | <sup>13</sup> C spectrum of compound <b>4b</b>           | S37  | <sup>13</sup> C spectrum of compound <b>17b</b>                                                                                                  |
| S14  | <sup>1</sup> H spectrum of compound <b>5</b>             | S38  | <sup>1</sup> H spectrum of compound <b>18</b>                                                                                                    |
| S15  | <sup>13</sup> C spectrum of compound <b>5</b>            | S39  | <sup>13</sup> C spectrum of compound <b>18</b>                                                                                                   |
| S16  | <sup>1</sup> H spectrum of compound <b>7</b>             | S40  | <sup>1</sup> H spectrum of compound <b>19</b>                                                                                                    |
| S17  | <sup>13</sup> C spectrum of compound <b>7</b>            | S41  | <sup>13</sup> C spectrum of compound <b>19</b>                                                                                                   |
| S18  | <sup>1</sup> H spectrum of compound <b>8</b>             | S42  | <sup>1</sup> H spectrum of compound <b>20</b>                                                                                                    |
| S19  | <sup>13</sup> C spectrum of compound <b>8</b>            | S43  | <sup>13</sup> C spectrum of compound <b>20</b>                                                                                                   |
| S20  | <sup>1</sup> H spectrum of compound <b>9</b>             | S44  | <sup>1</sup> H spectrum of compound <b>21</b>                                                                                                    |
| S21  | <sup>13</sup> C spectrum of compound <b>9</b>            | S45  | <sup>13</sup> C spectrum of compound <b>21</b>                                                                                                   |
| S22  | <sup>1</sup> H spectrum of compound <b>10</b>            | S46  | <sup>1</sup> H spectrum of 1,3-di- <i>O</i> -decanoyl-2- <i>O</i> -(2',3',4',6'-tetra- <i>O</i> -acetyl-β-D-glucopyranosyl)- <i>sn</i> -glycerol |
| S23  | <sup>13</sup> C spectrum of compound <b>10</b>           | S47  | <sup>13</sup> C spectrum 1,3-di- <i>O</i> -decanoyl-2- <i>O</i> -(2',3',4',6'-tetra- <i>O</i> -acetyl-β-D-glucopyranosyl)- <i>sn</i> -glycerol   |
| S24  | <sup>1</sup> H spectrum of compound <b>11</b>            |      |                                                                                                                                                  |

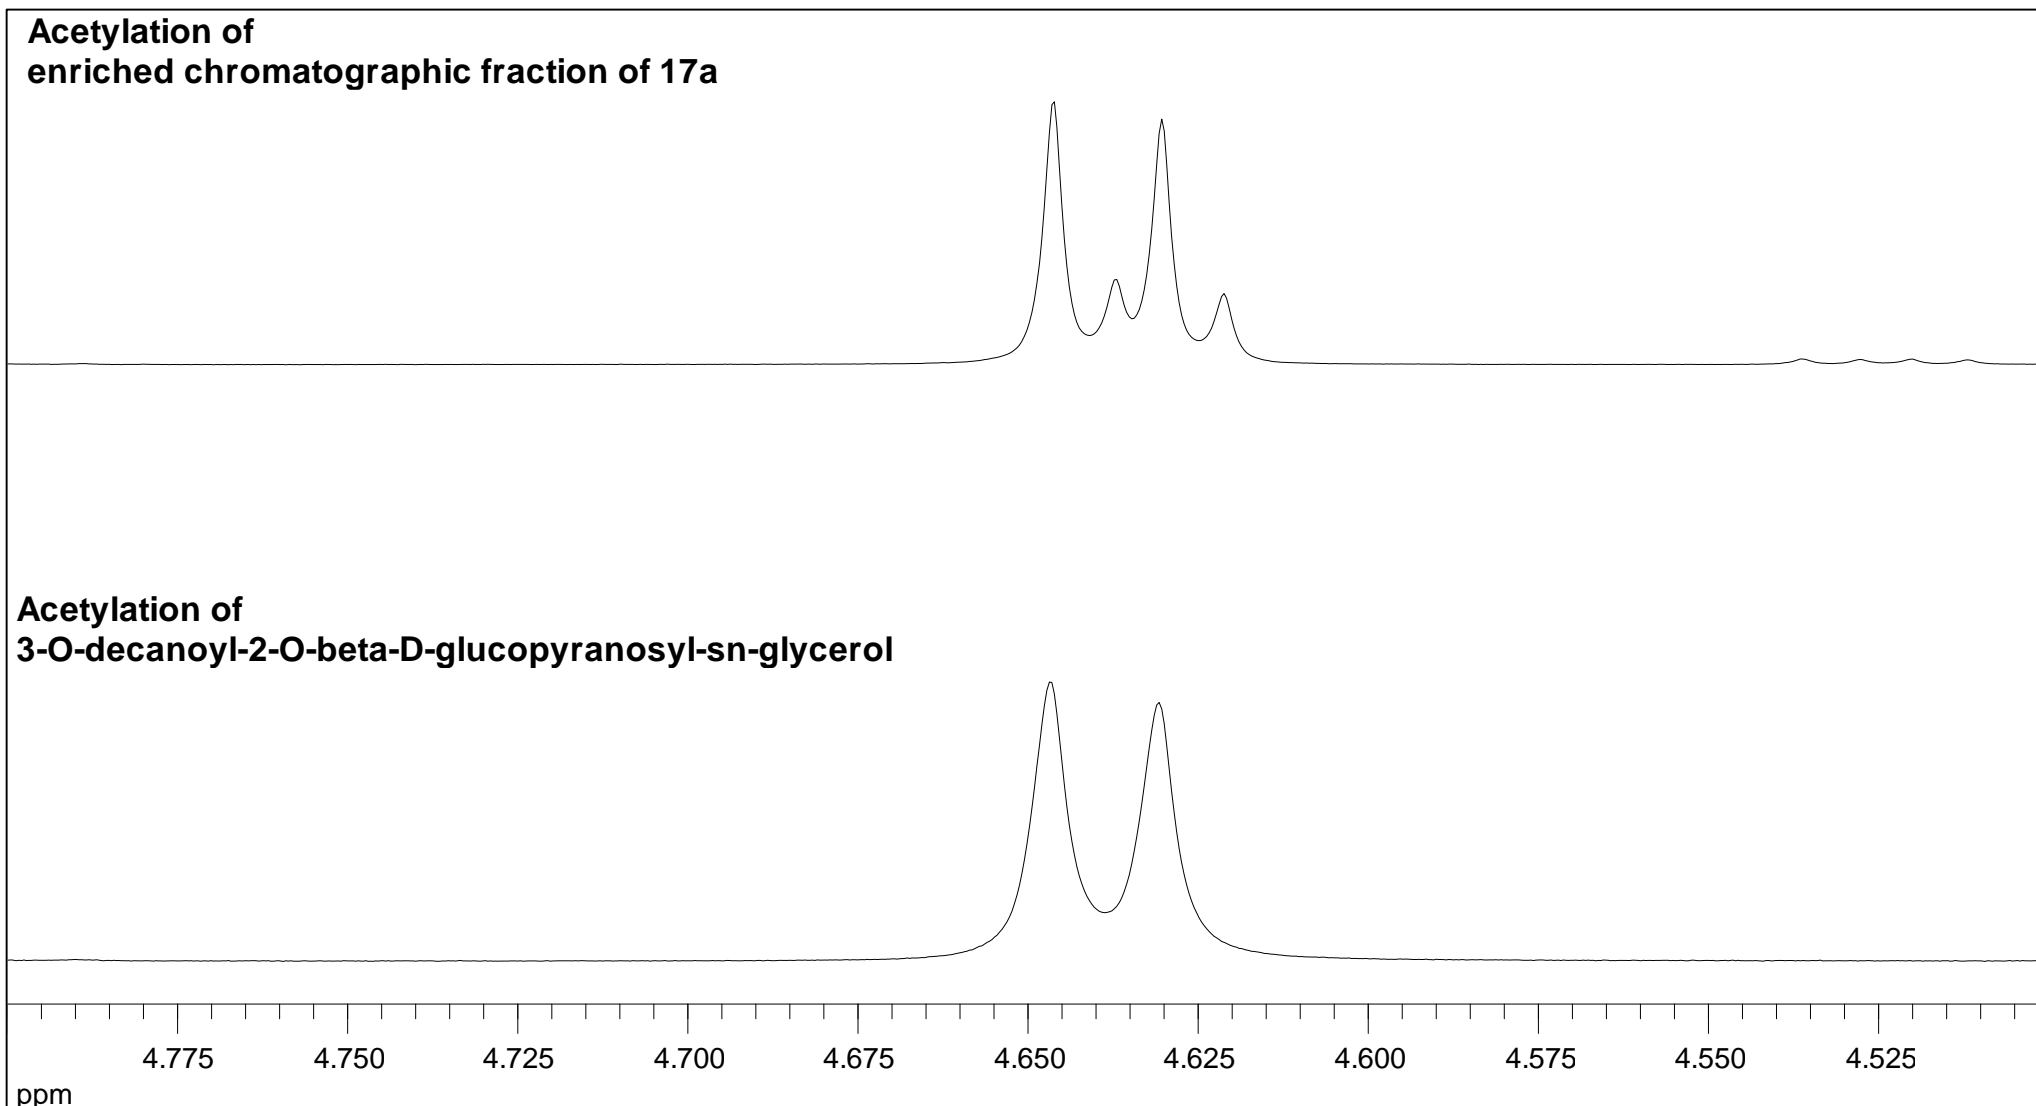

**Figure S1:** Configuration assignment of compound **17a** by comparison of the  $^1\text{H}$  anomeric resonances.

## STABILITY STUDIES

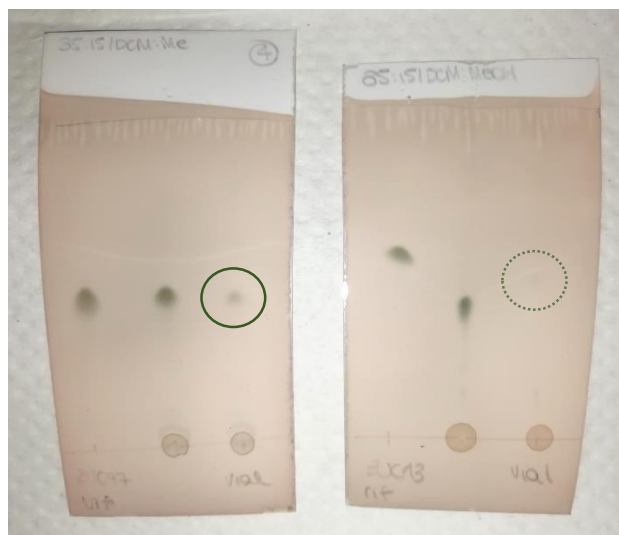

**A**

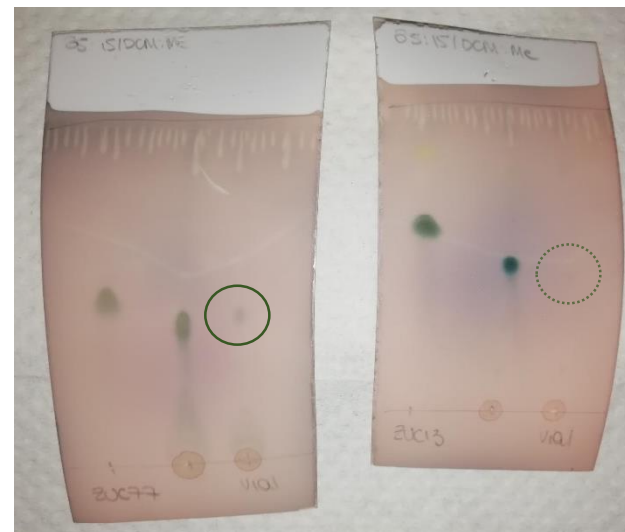

**B**

**Figure S2: A.** TLC at 16 h of compound **3b** (left) and **5** (right), DCM:MeOH (85:15). In each TLC the pure compound is seeded on the left while on the right after incubation with serum, in the centre the superimposition of both. **B.** TLC at 24 h of compound **3b** (left) and **5** (right), DCM:MeOH (85:15). In each TLC the pure compound is seeded on the left while on the right after incubation with serum; in the centre the superimposition of both.

# STABILITY STUDIES

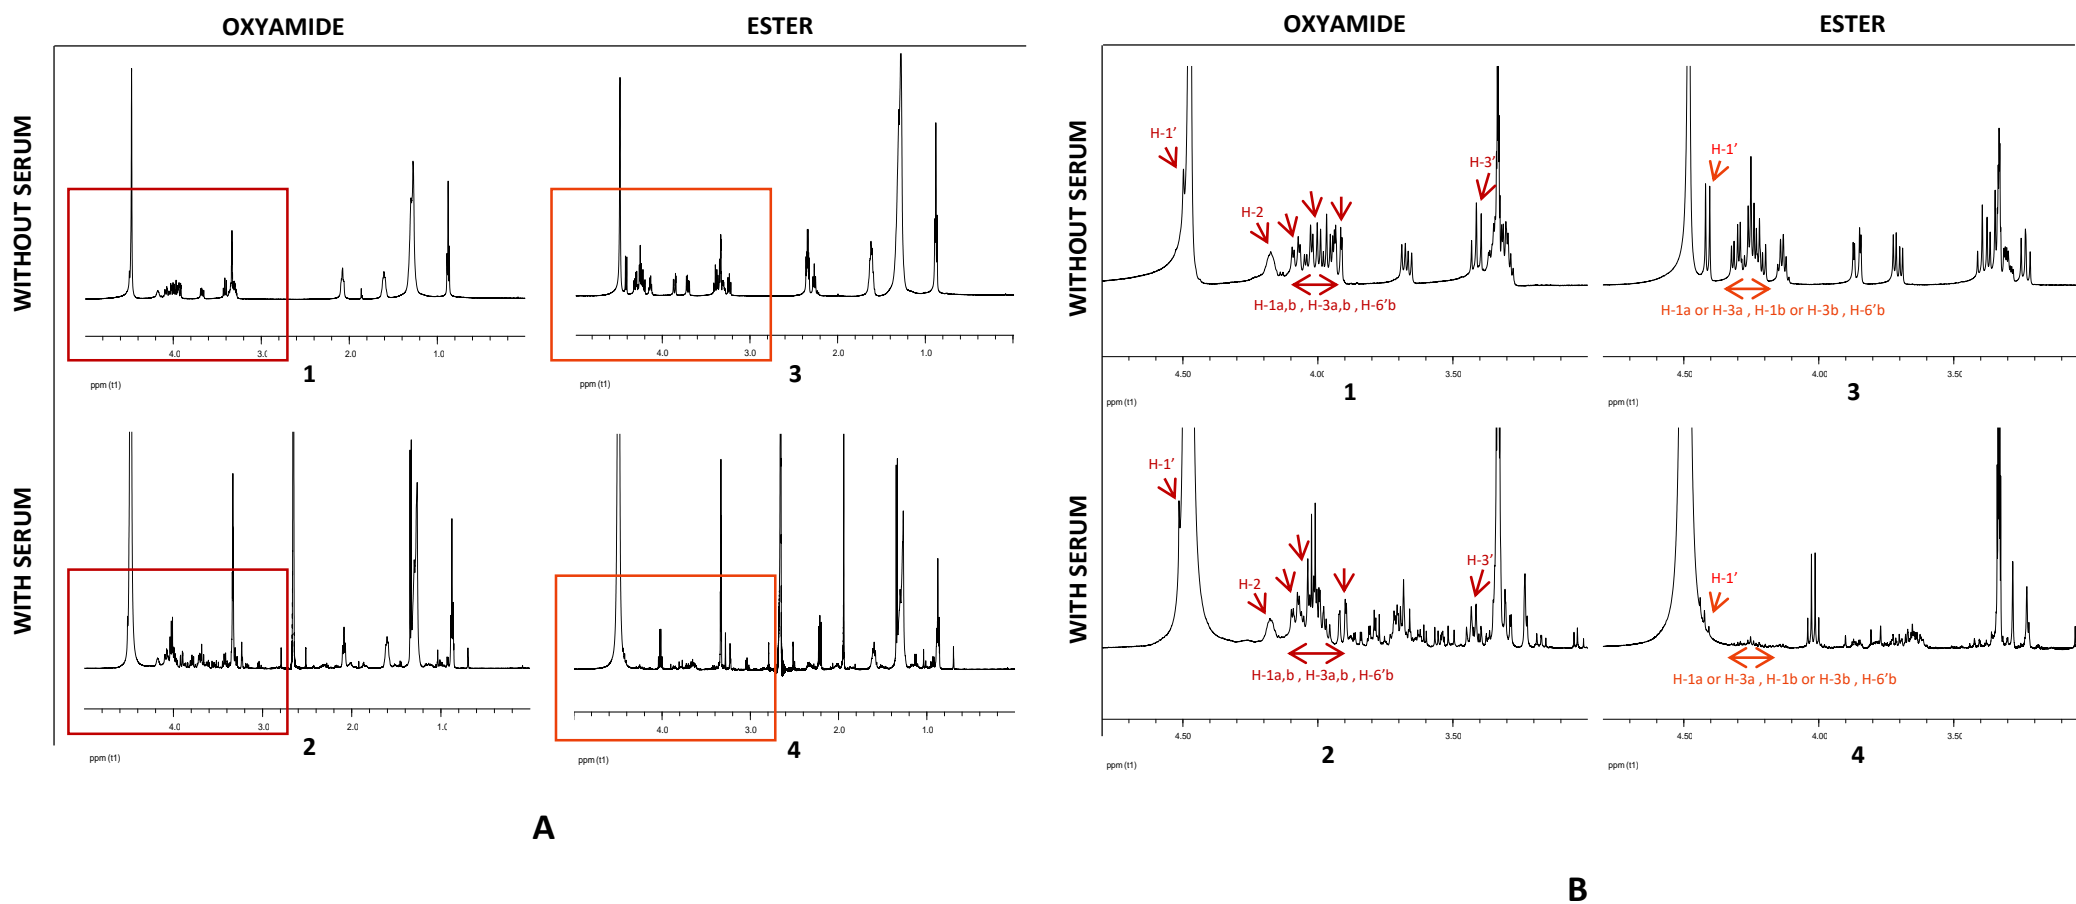

**Figure S3:**  $^1\text{H}$  NMR spectra of compound **3b** (A-1), compound **3b** after incubation with serum (A-2), compound **5** (A-3), compound **5** after incubation with serum (A-4). B-1/B-4: 3.0-4.8 ppm window of the corresponding  $^1\text{H}$  NMR spectra A-1/A-4. The arrows highlighting characteristic signals of the compounds recognisable in the NMR spectra after incubation.

## SERUM BINDING STUDY on compound 3a

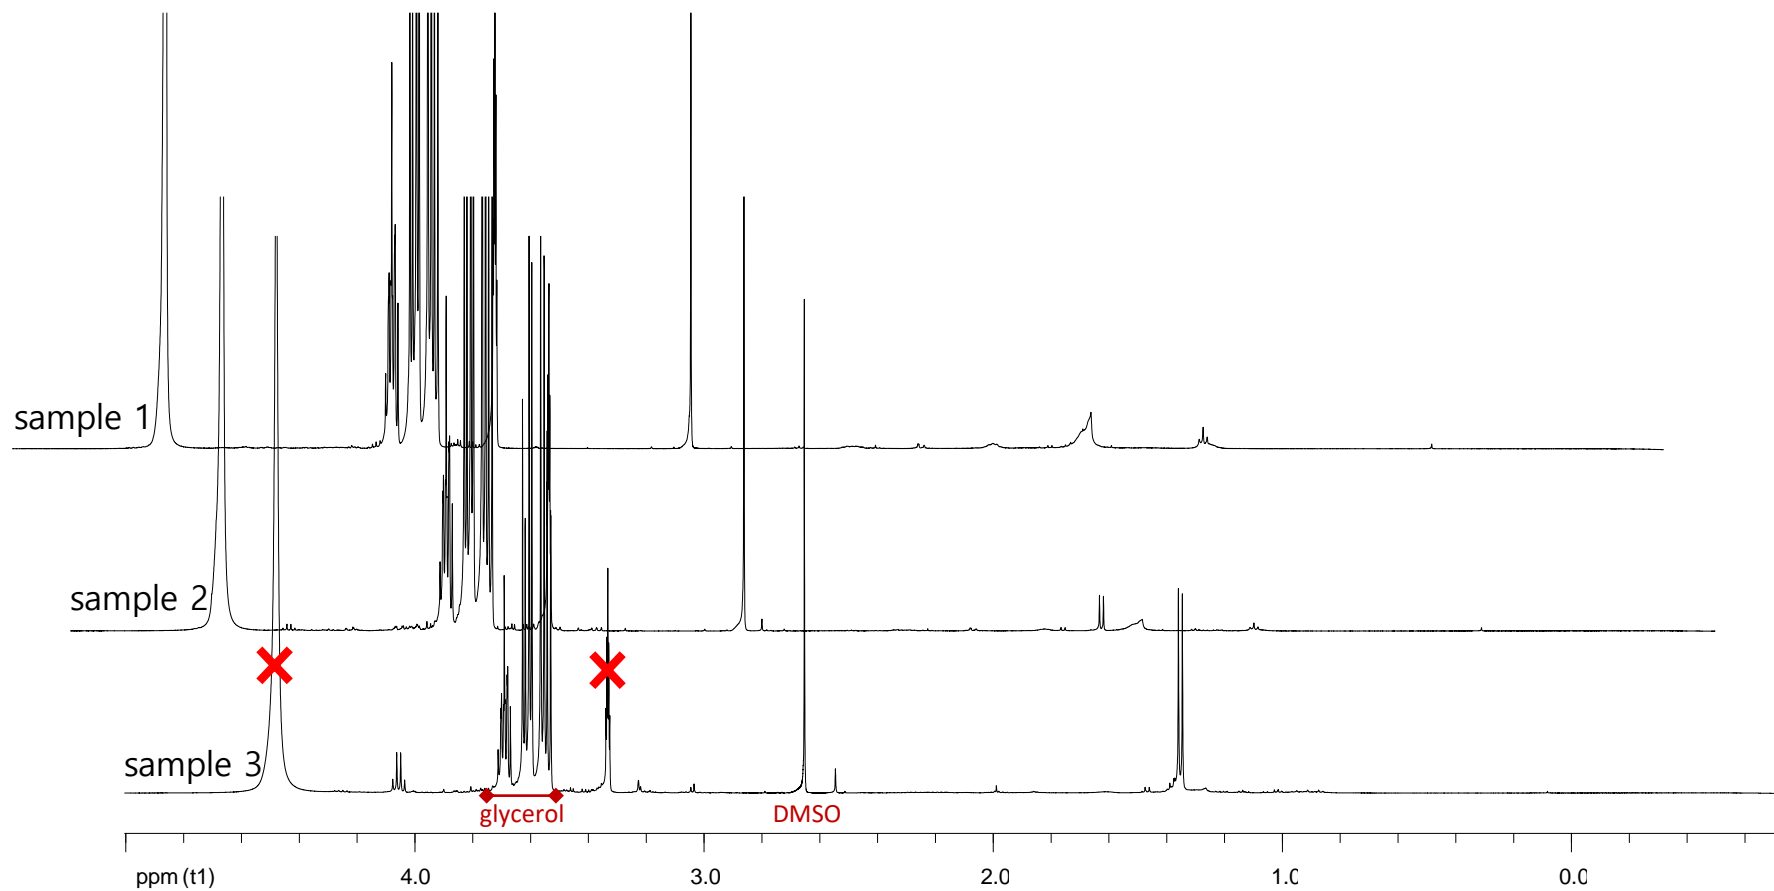

**Figure S4:** comparison of the <sup>1</sup>H NMR spectra of sample 1, 2 and 3 (0%, 10%, 60% serum concentration respectively). Glycerol appears as an impurity from the Amicon® Ultra-0.5 30K centrifugal filter device at 3.53-3.70 ppm. DMSO (2.65 ppm) is used as an internal standard.

## SERUM BINDING STUDY on compound 3a

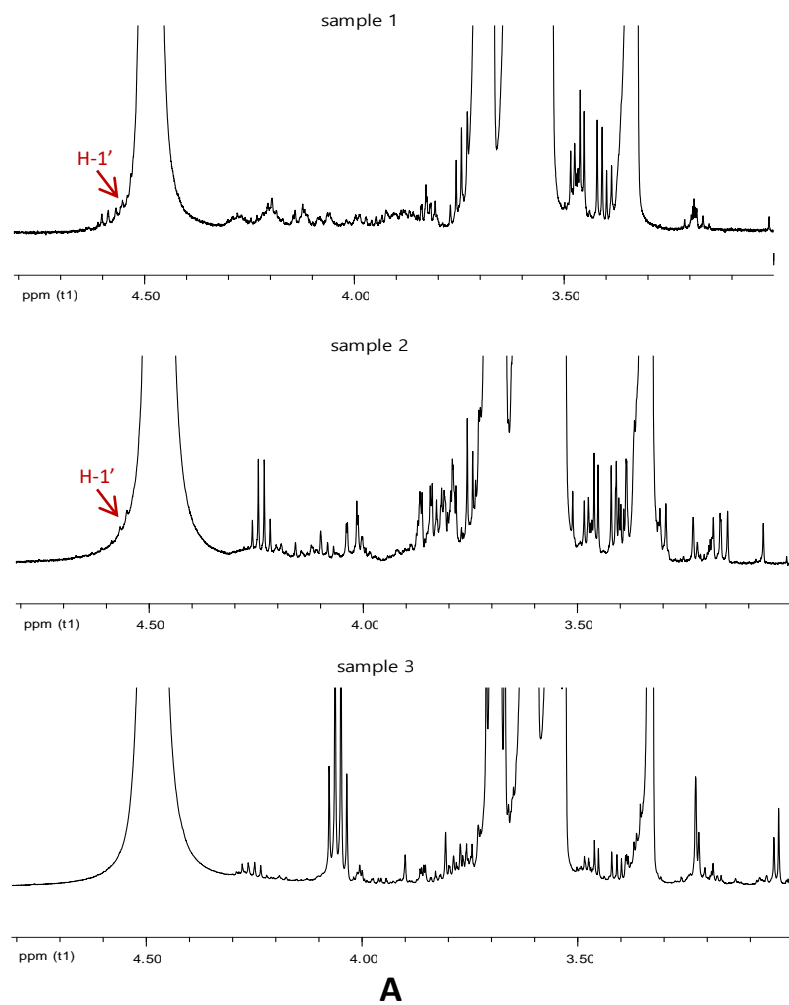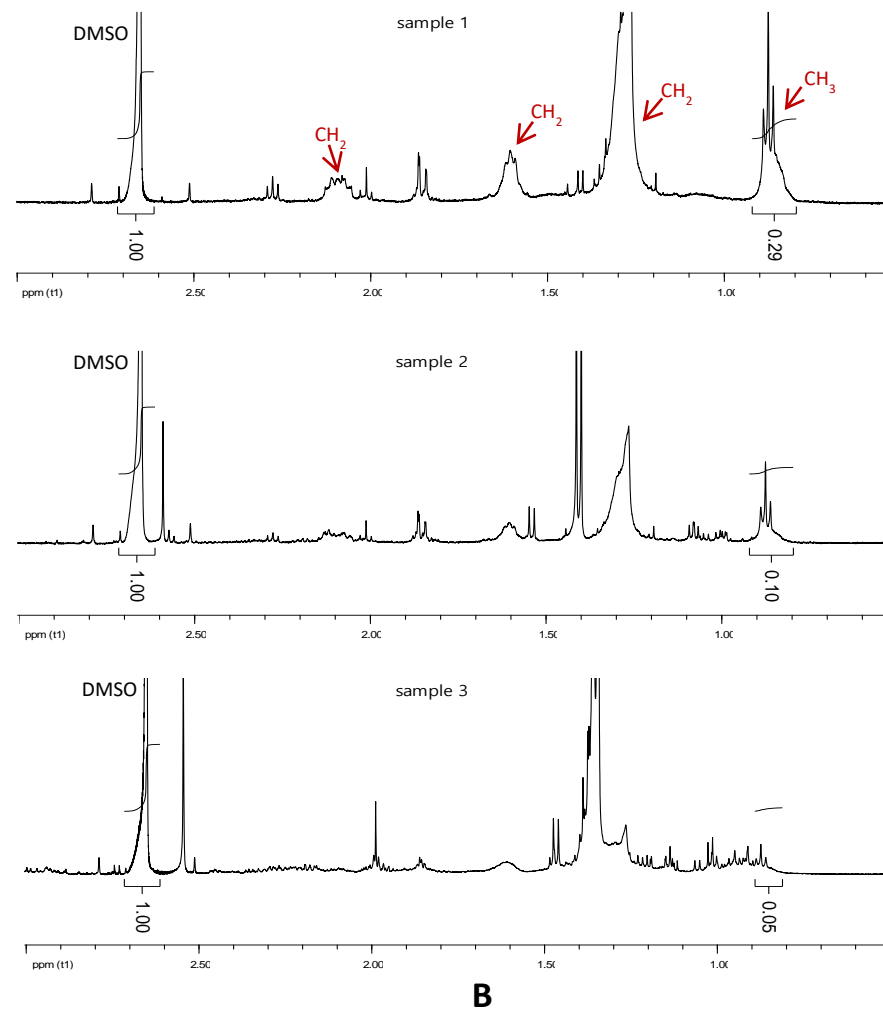

**Figure S5: A.** 3.0-4.8 ppm window of the <sup>1</sup>H NMR spectra of sample 1, 2, and 3 (0%, 10%, 60% serum concentration respectively): the arrows indicate the H-1' of the glucose moiety. **B.** 0-3 ppm window of the <sup>1</sup>H NMR spectra of sample 1, 2 and 3: integrals of signals at 2.65 ppm (DMSO, internal standard) and 0.863 ppm (CH<sub>3</sub> of the acyl chains) are shown. Their comparison shows the diminishing of non-bound **3a** with the increase of serum amount. The arrows indicate characteristic resonances of compound **3a**.

Compound 3a

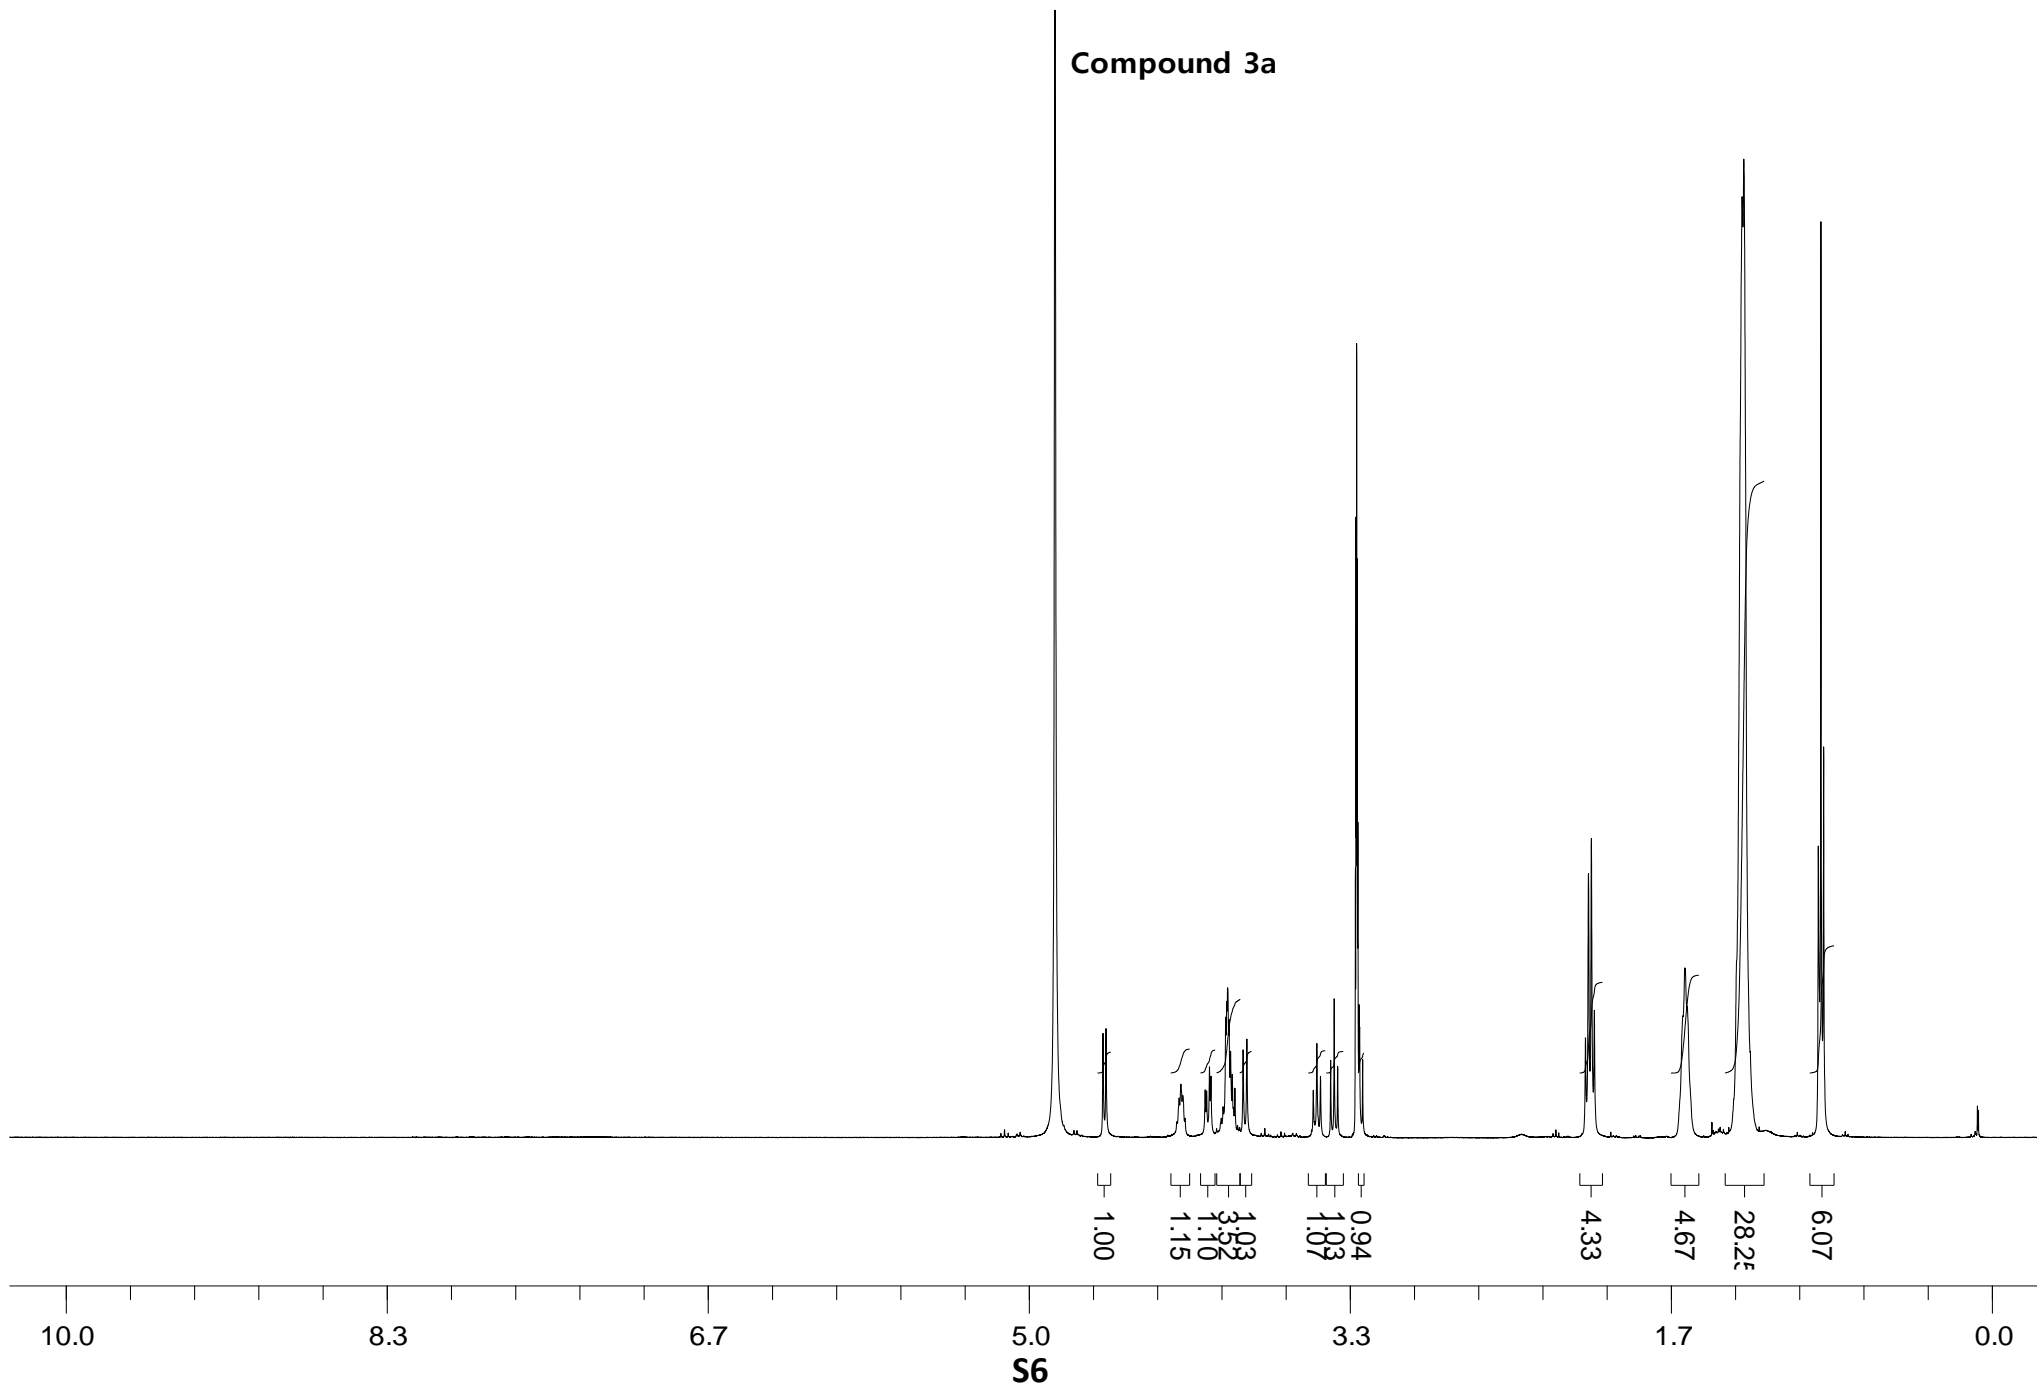

Compound 3a

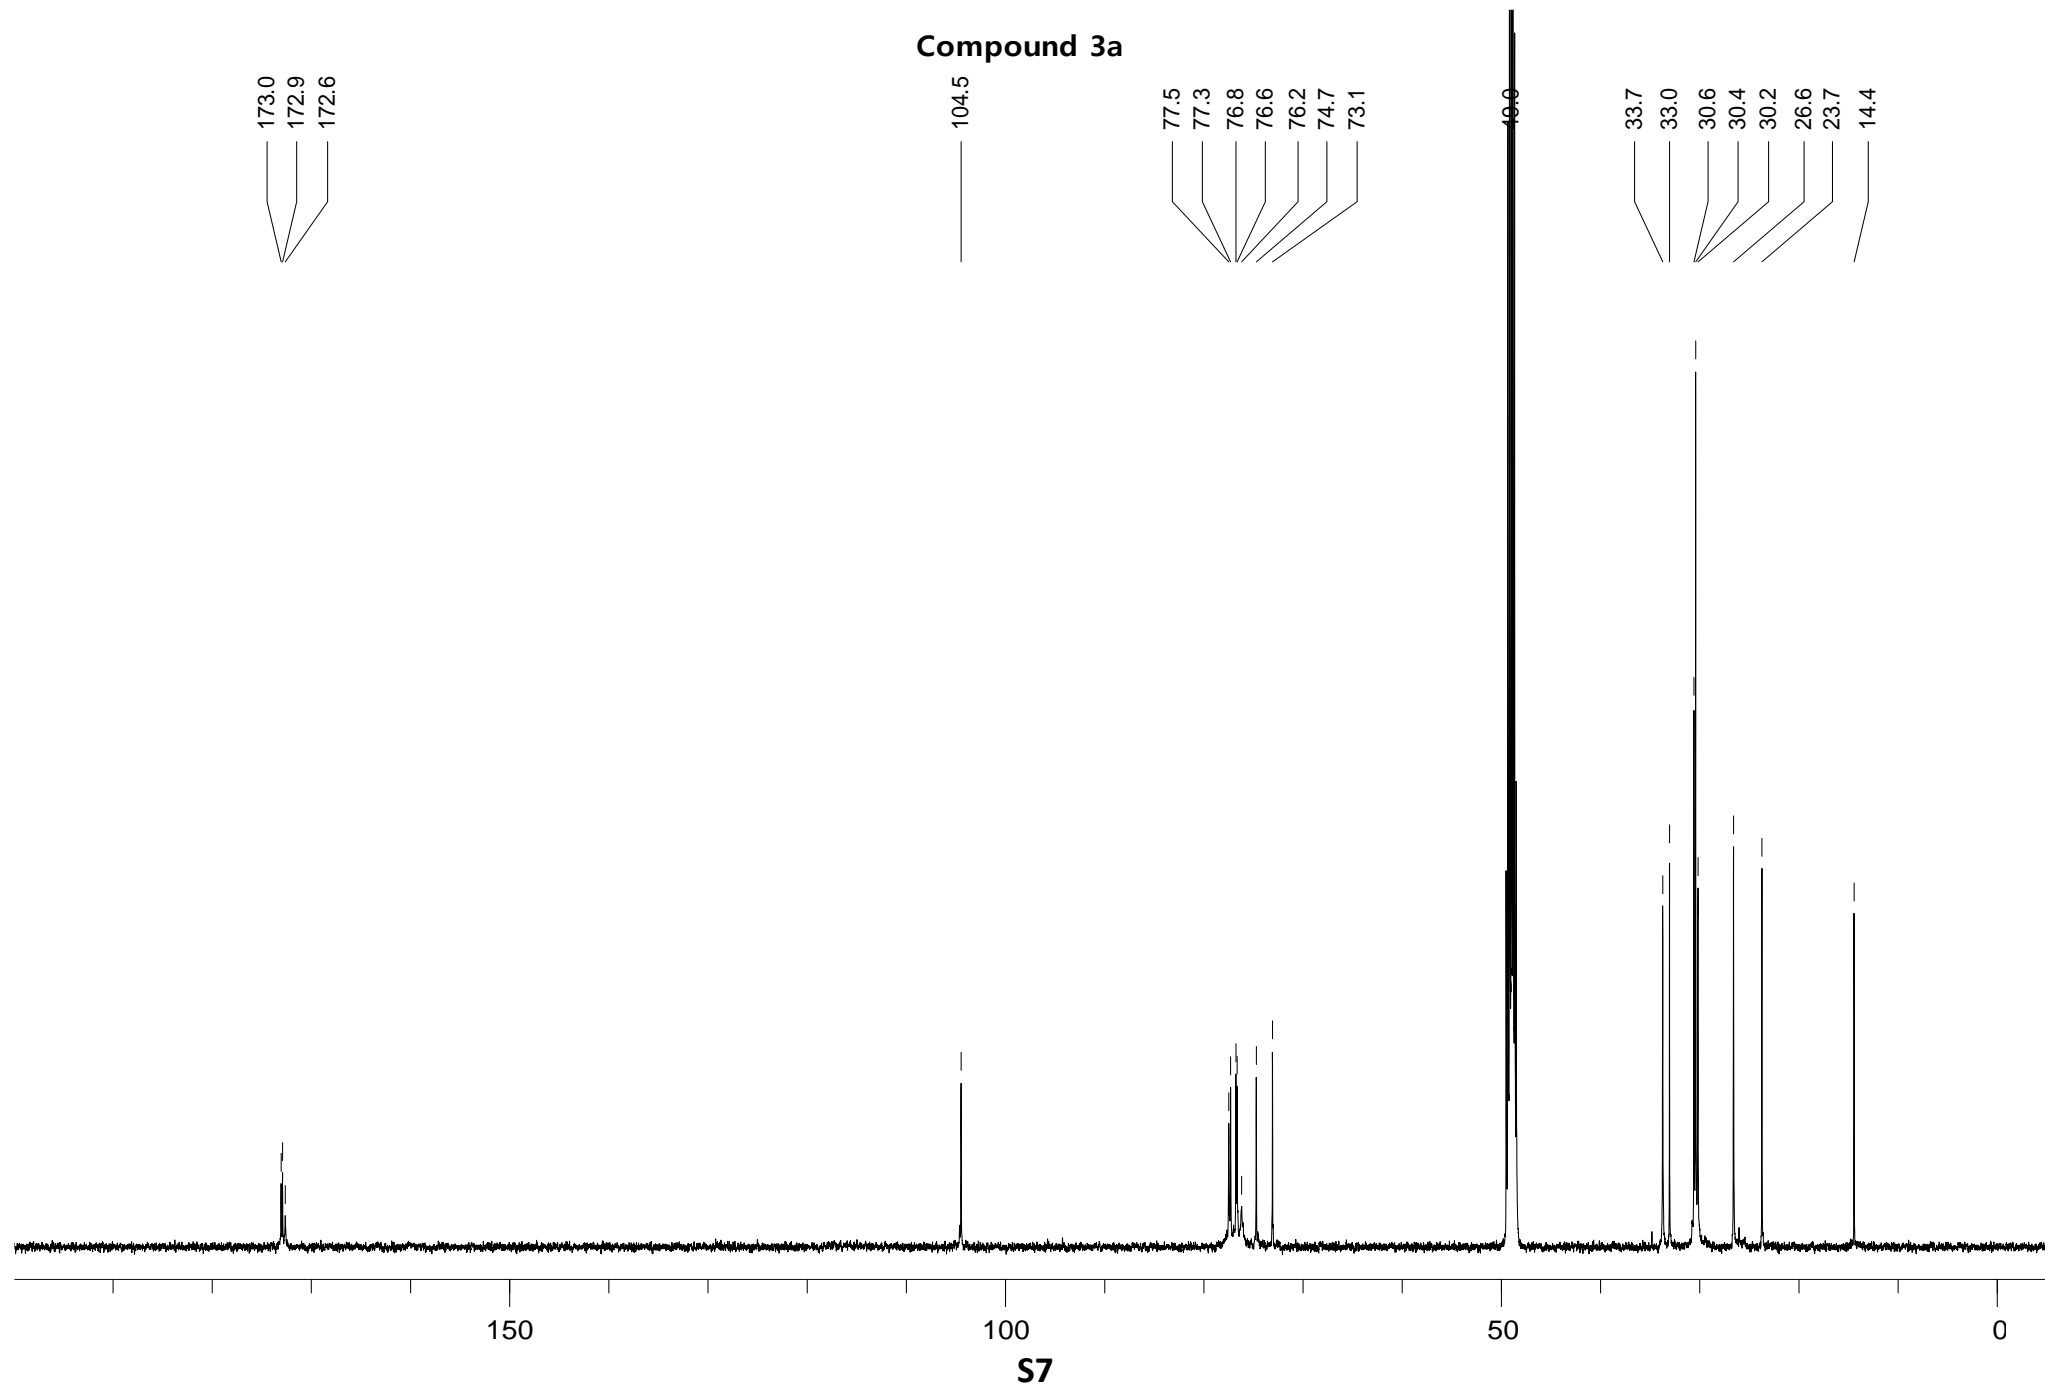



Compound 3b

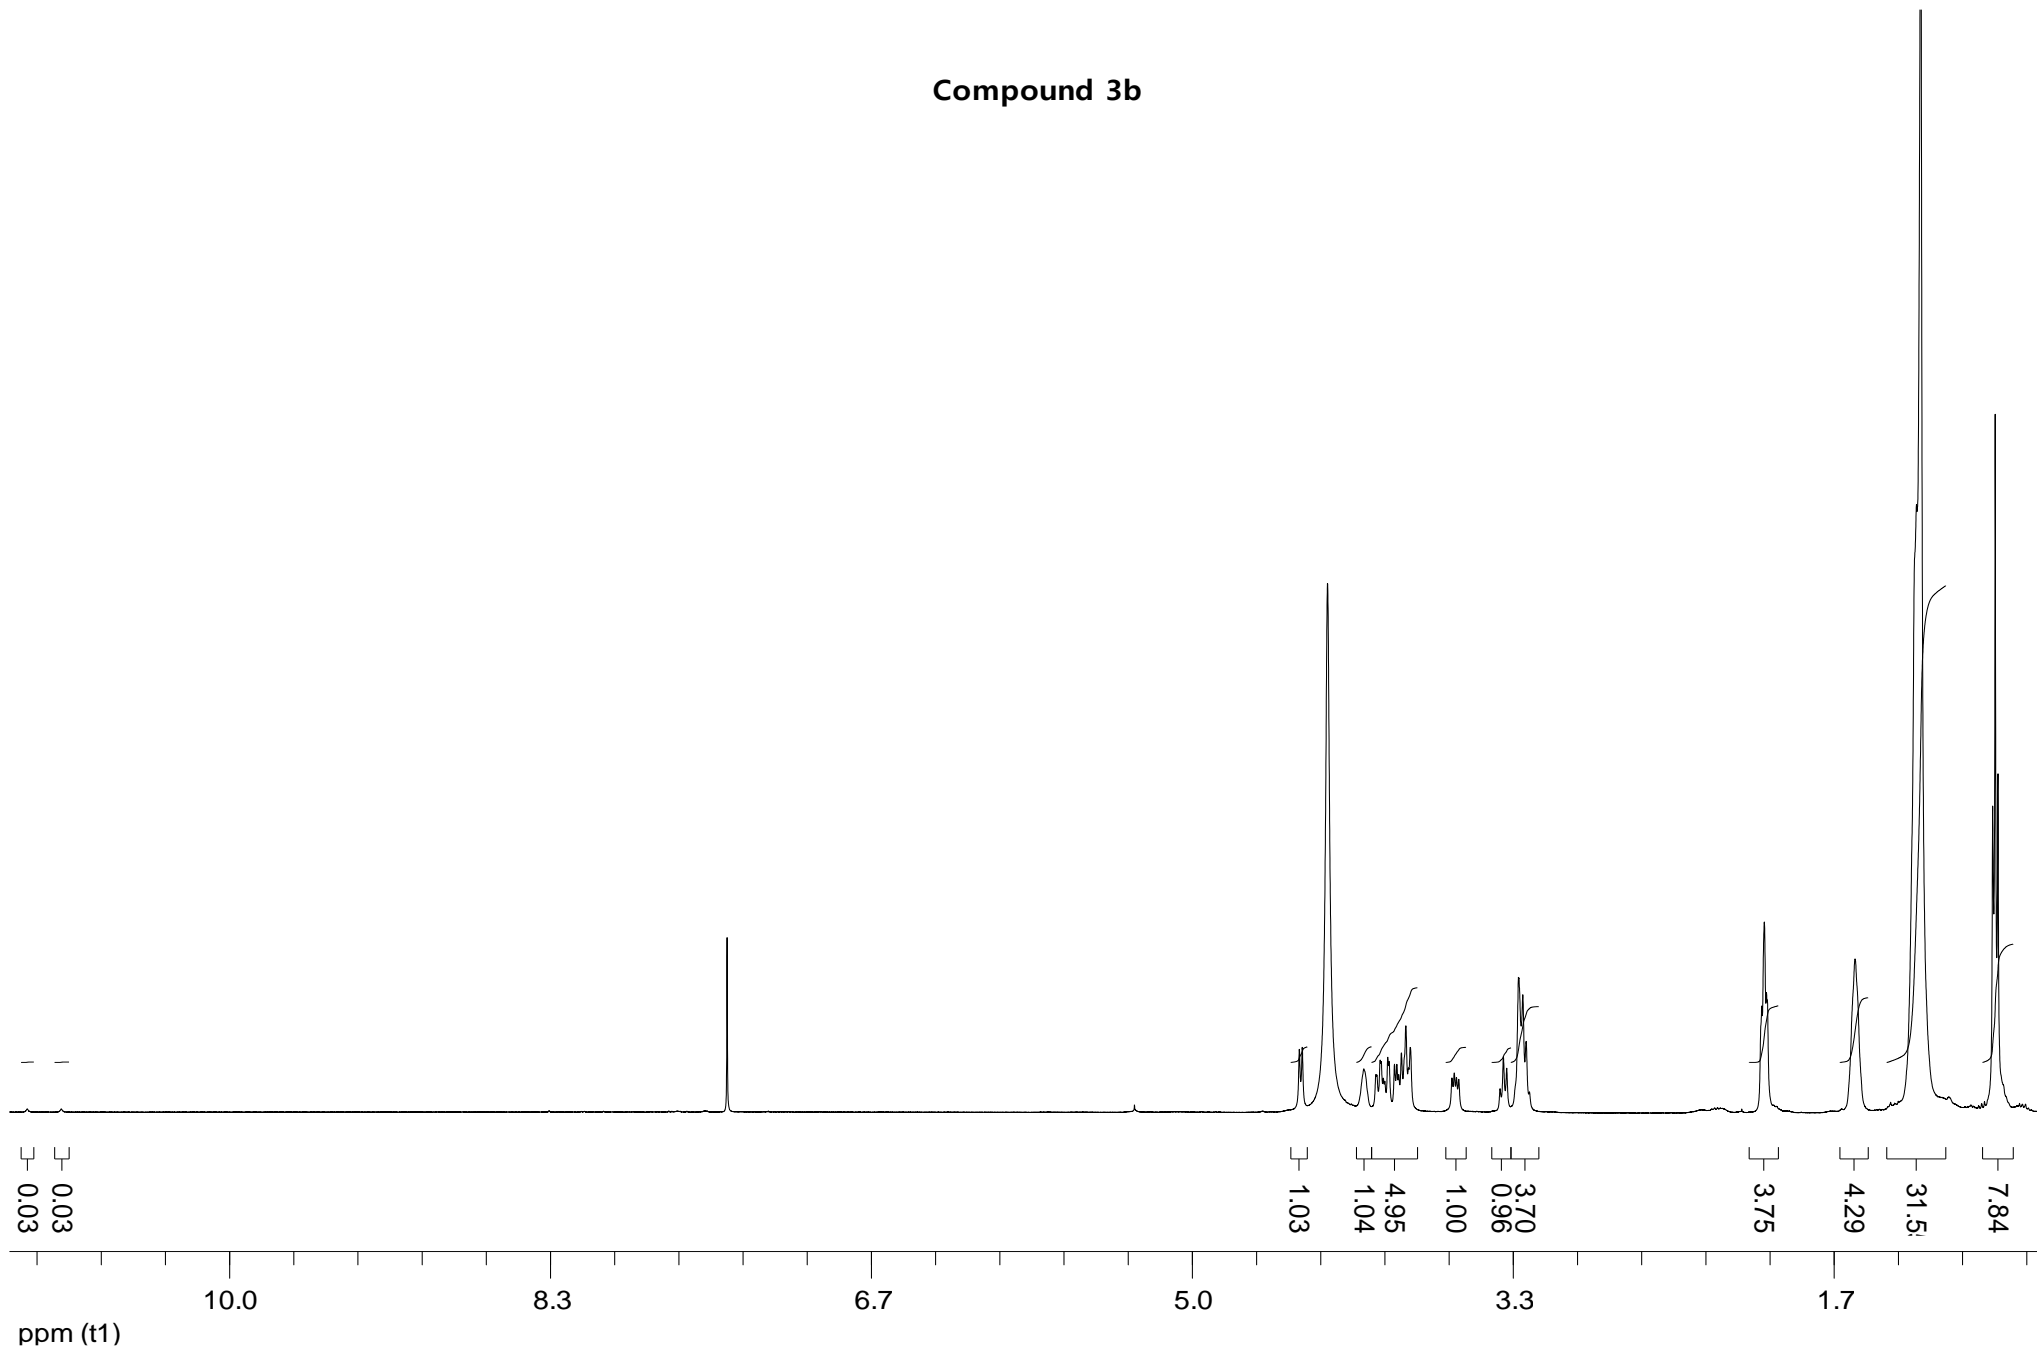

S8

Compound 3b

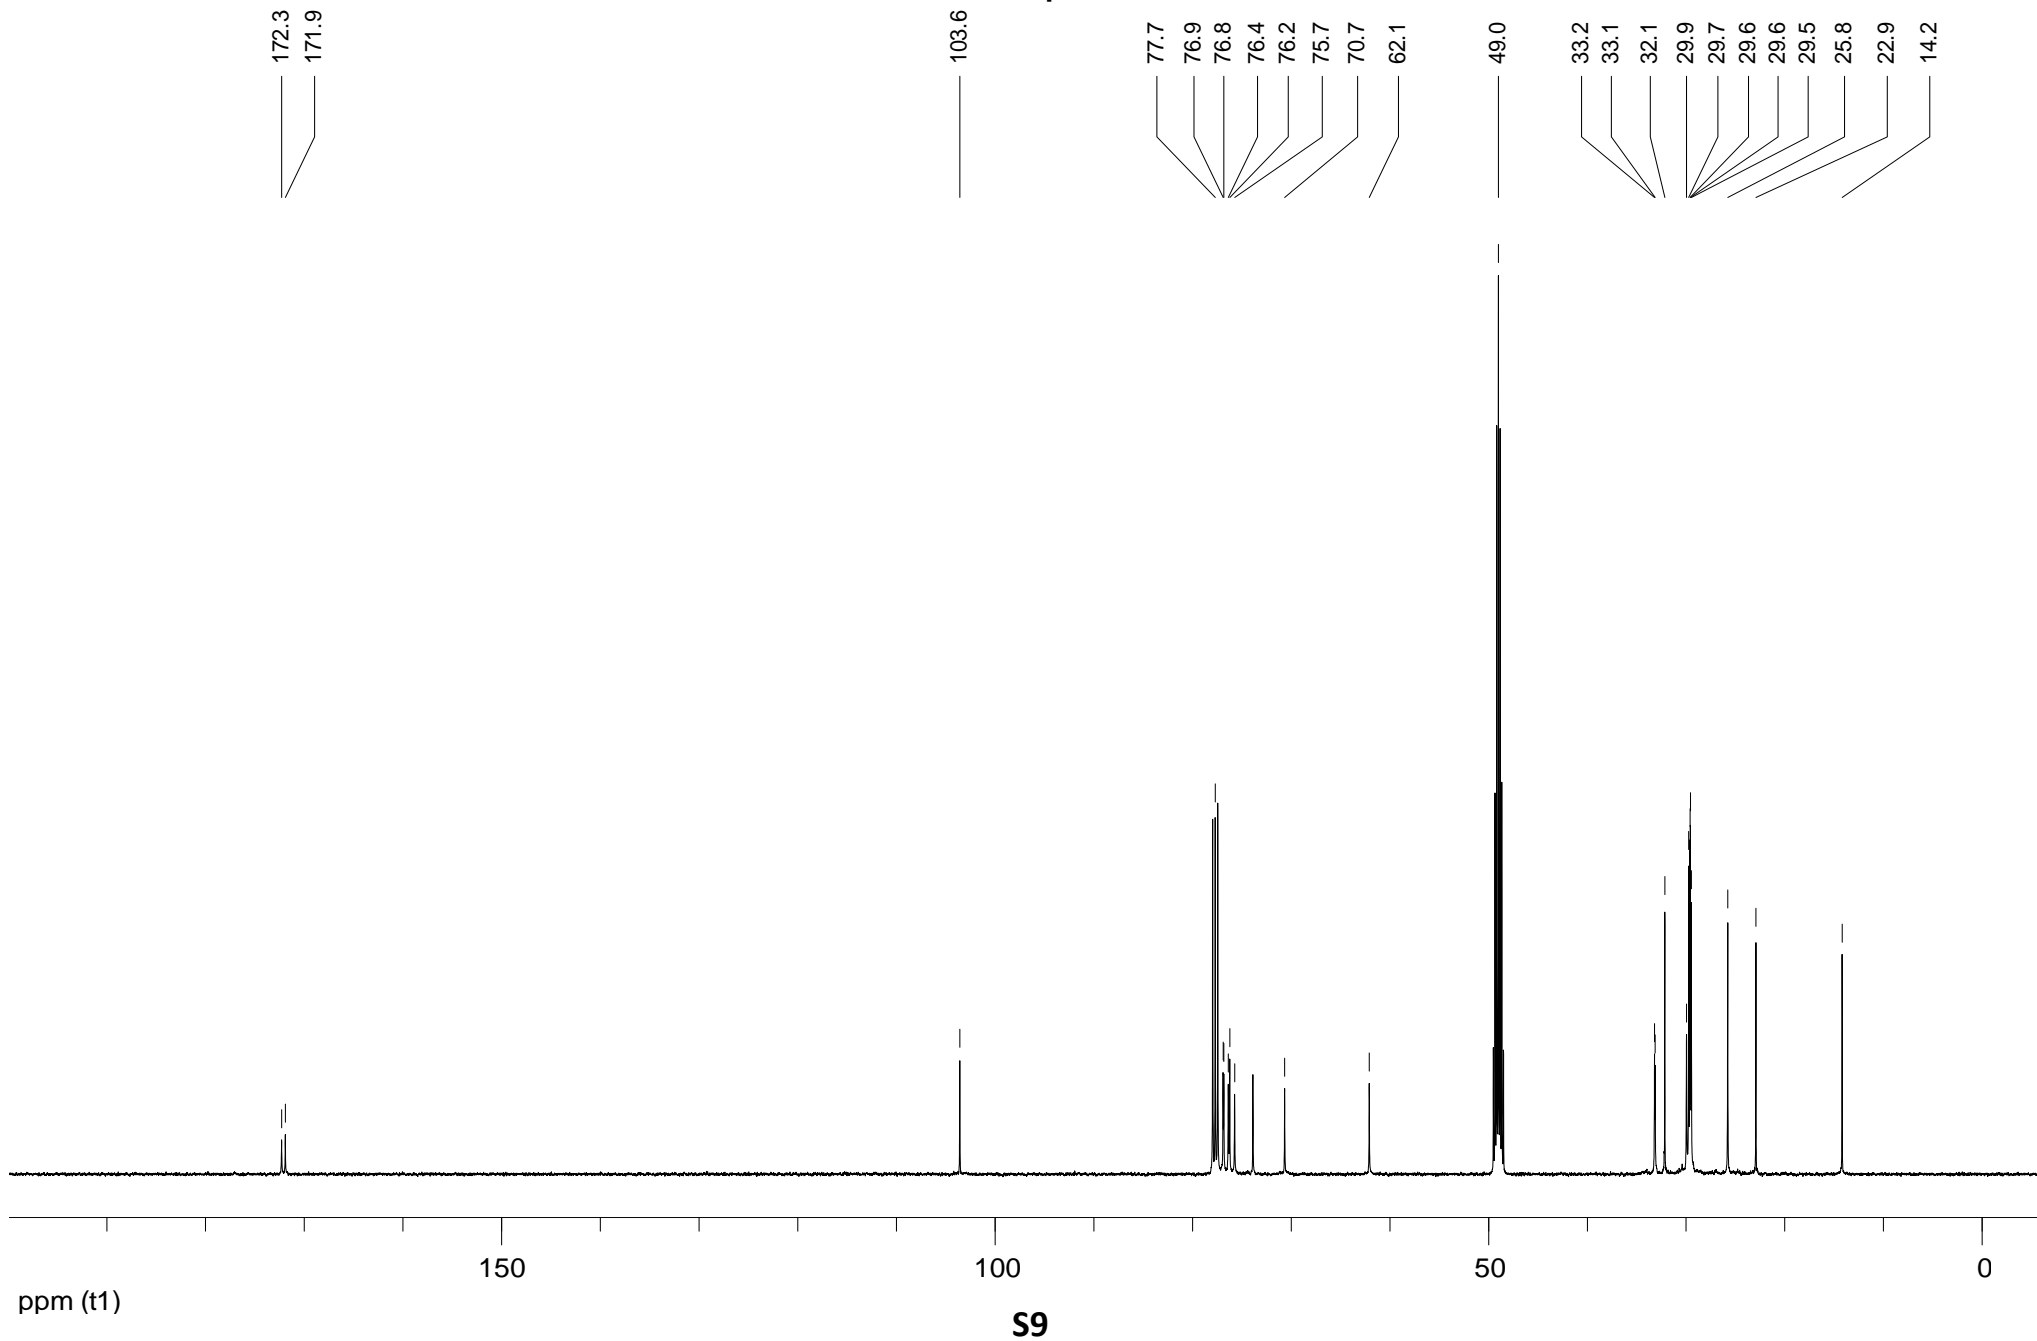

Compound 4a

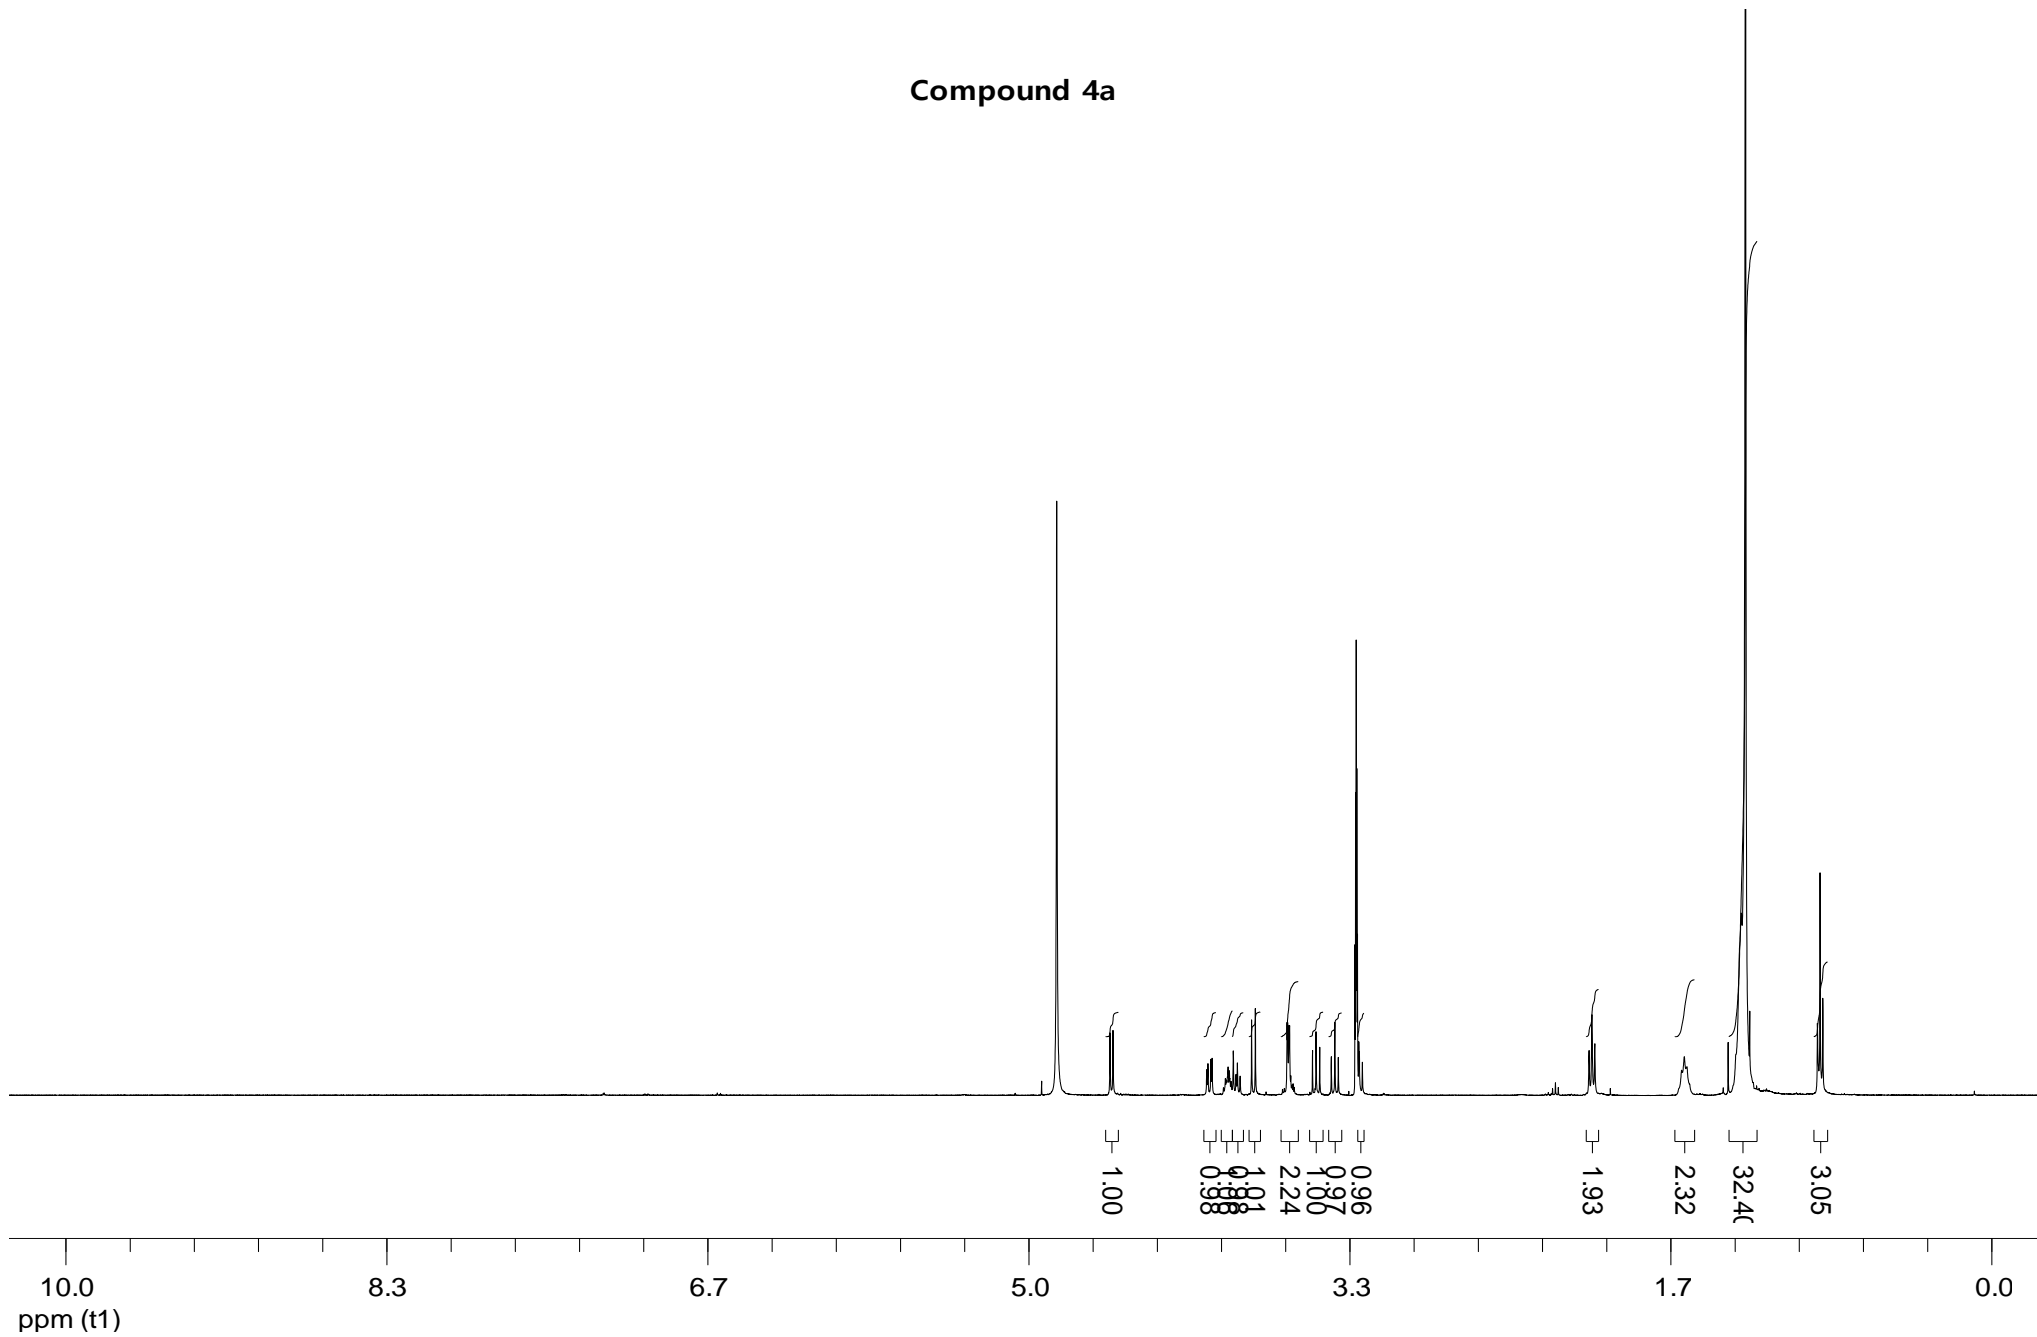

S10

Compound 4a

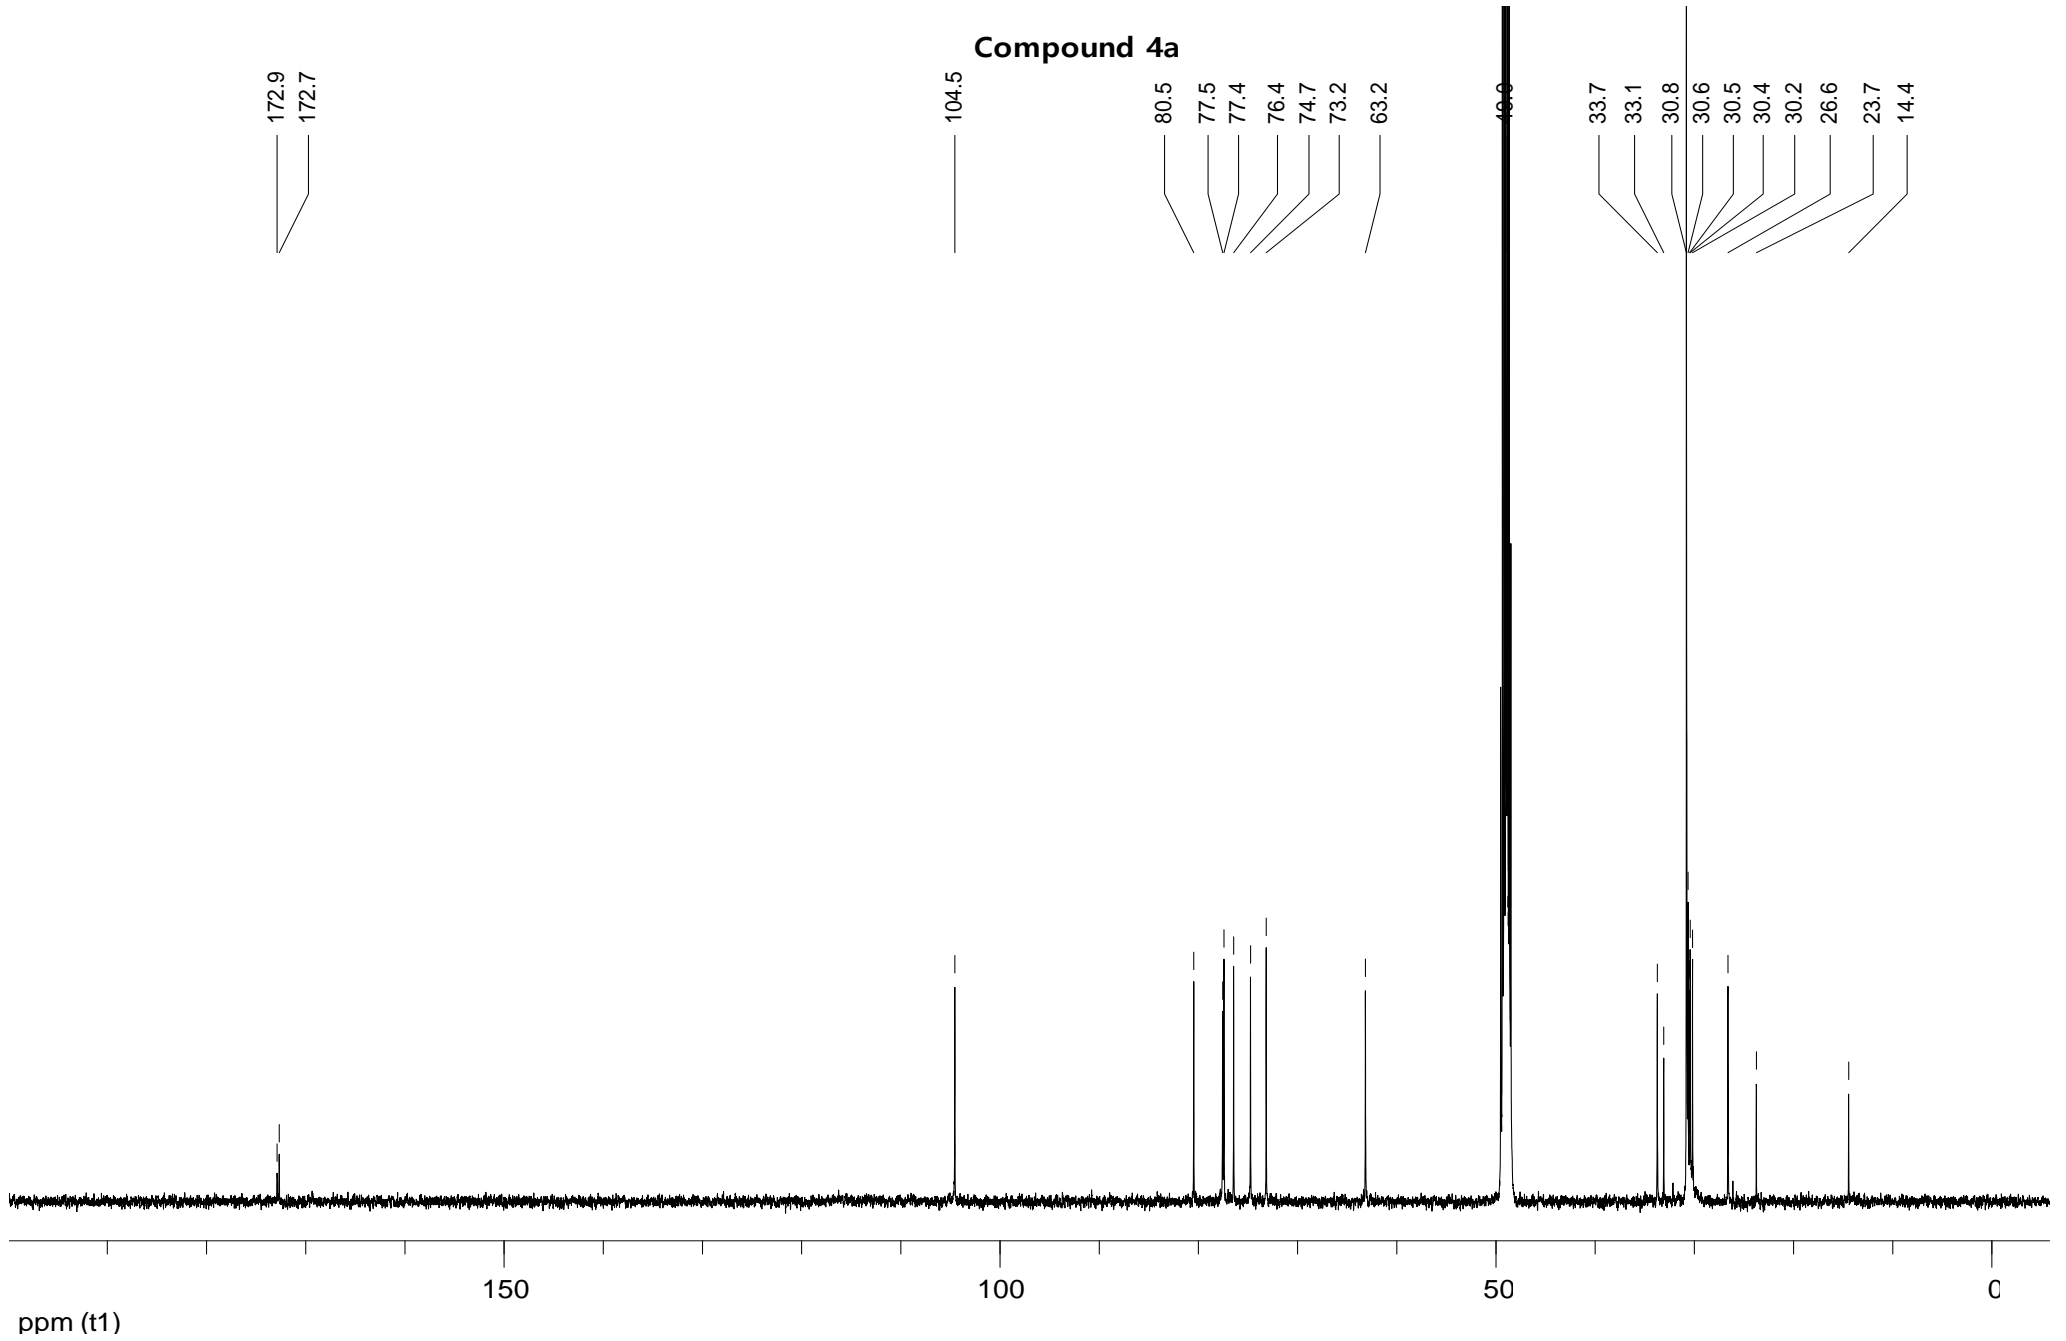

S11

Compound 4b

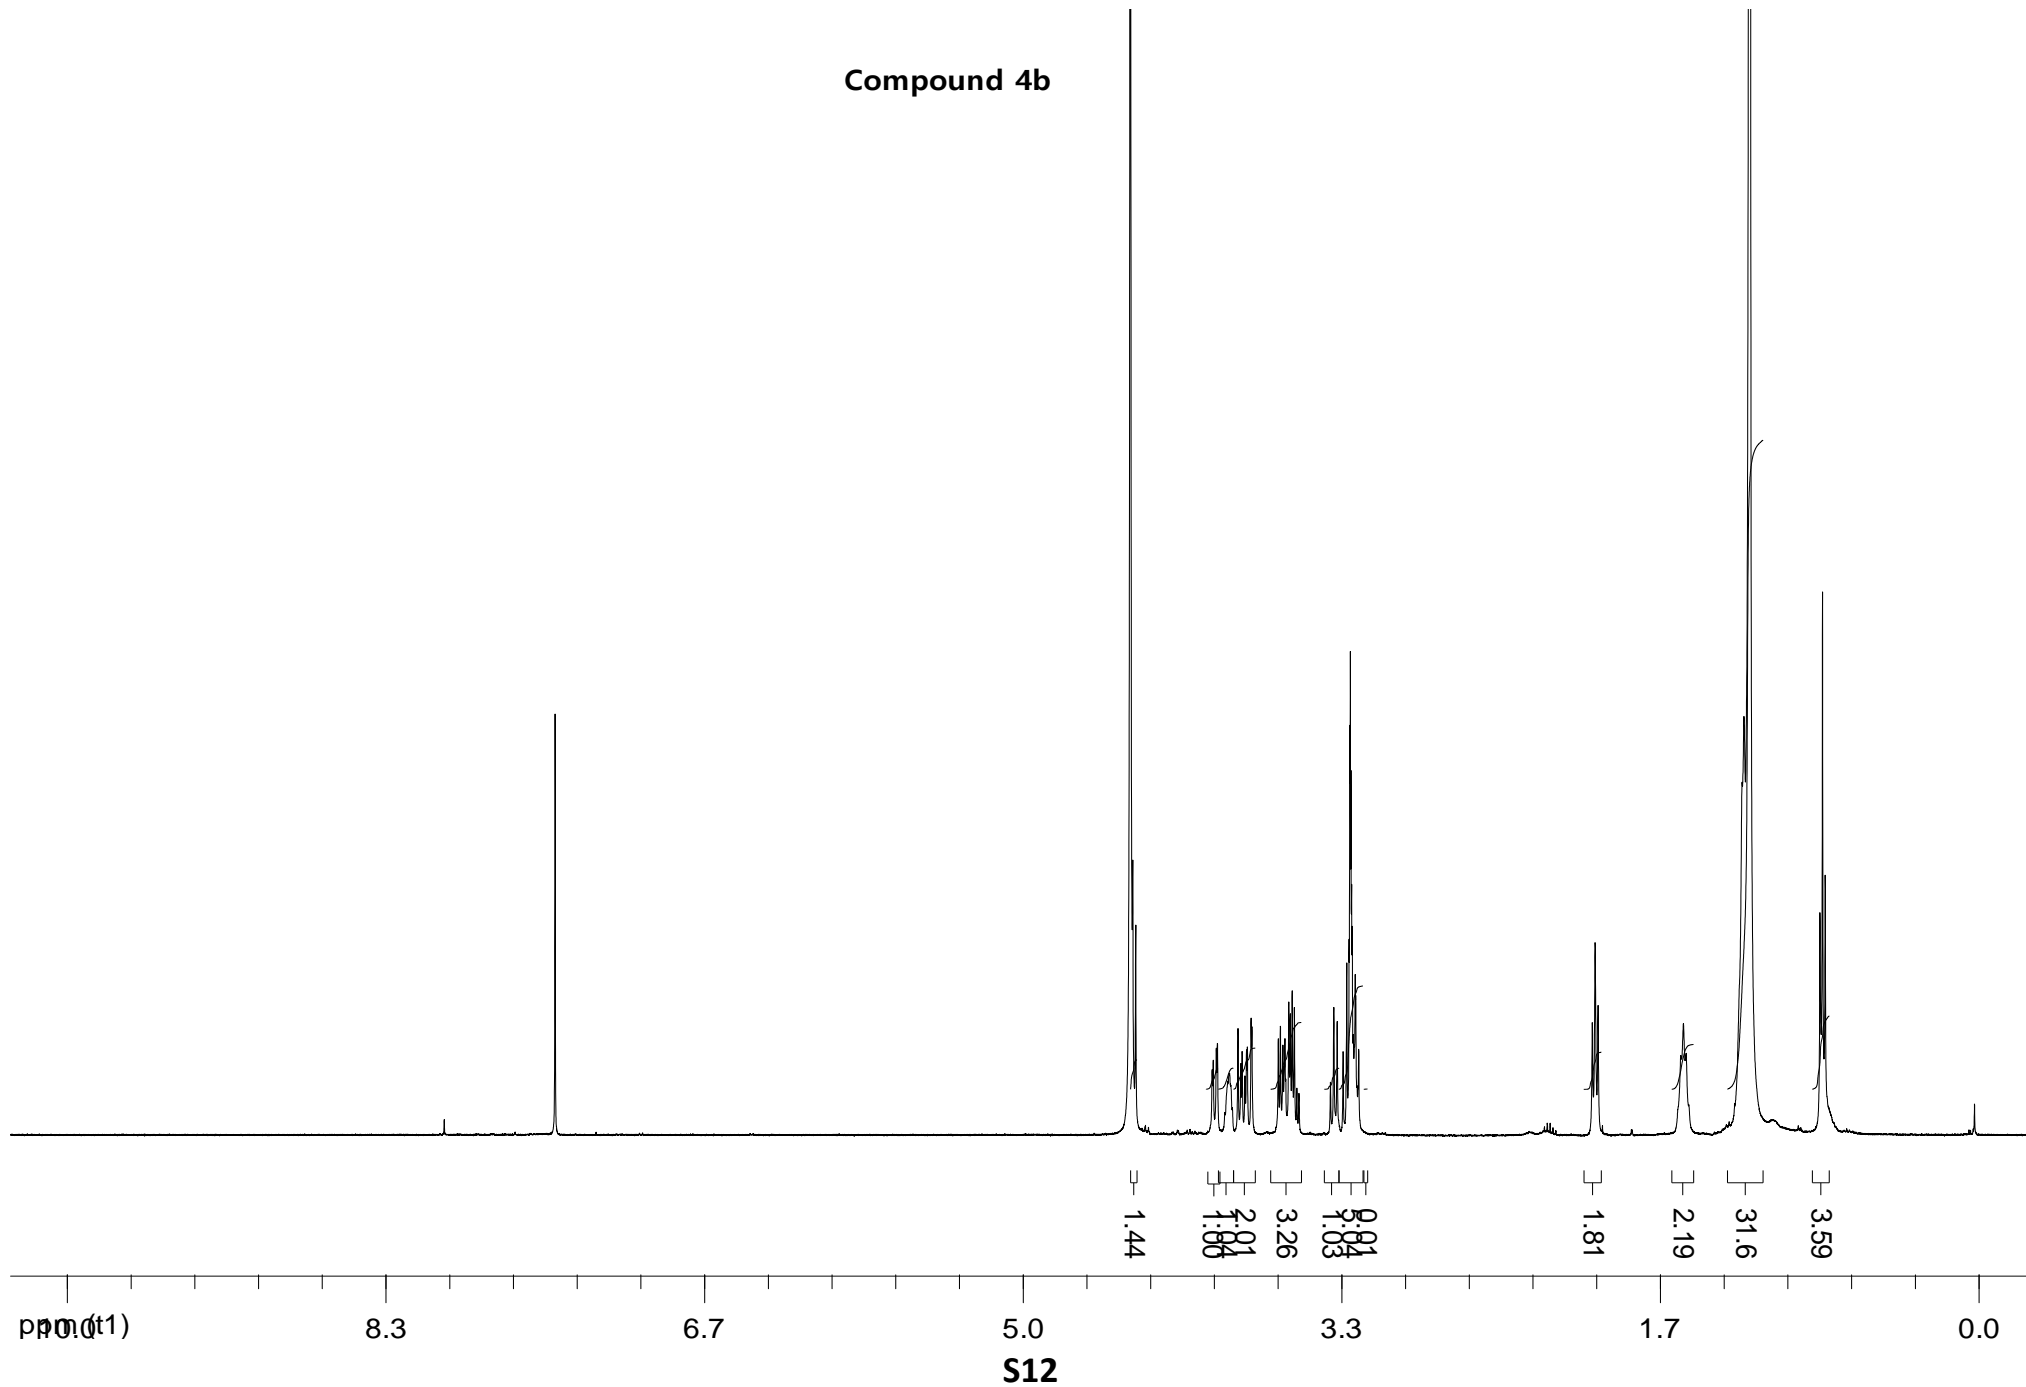

Compound 4b

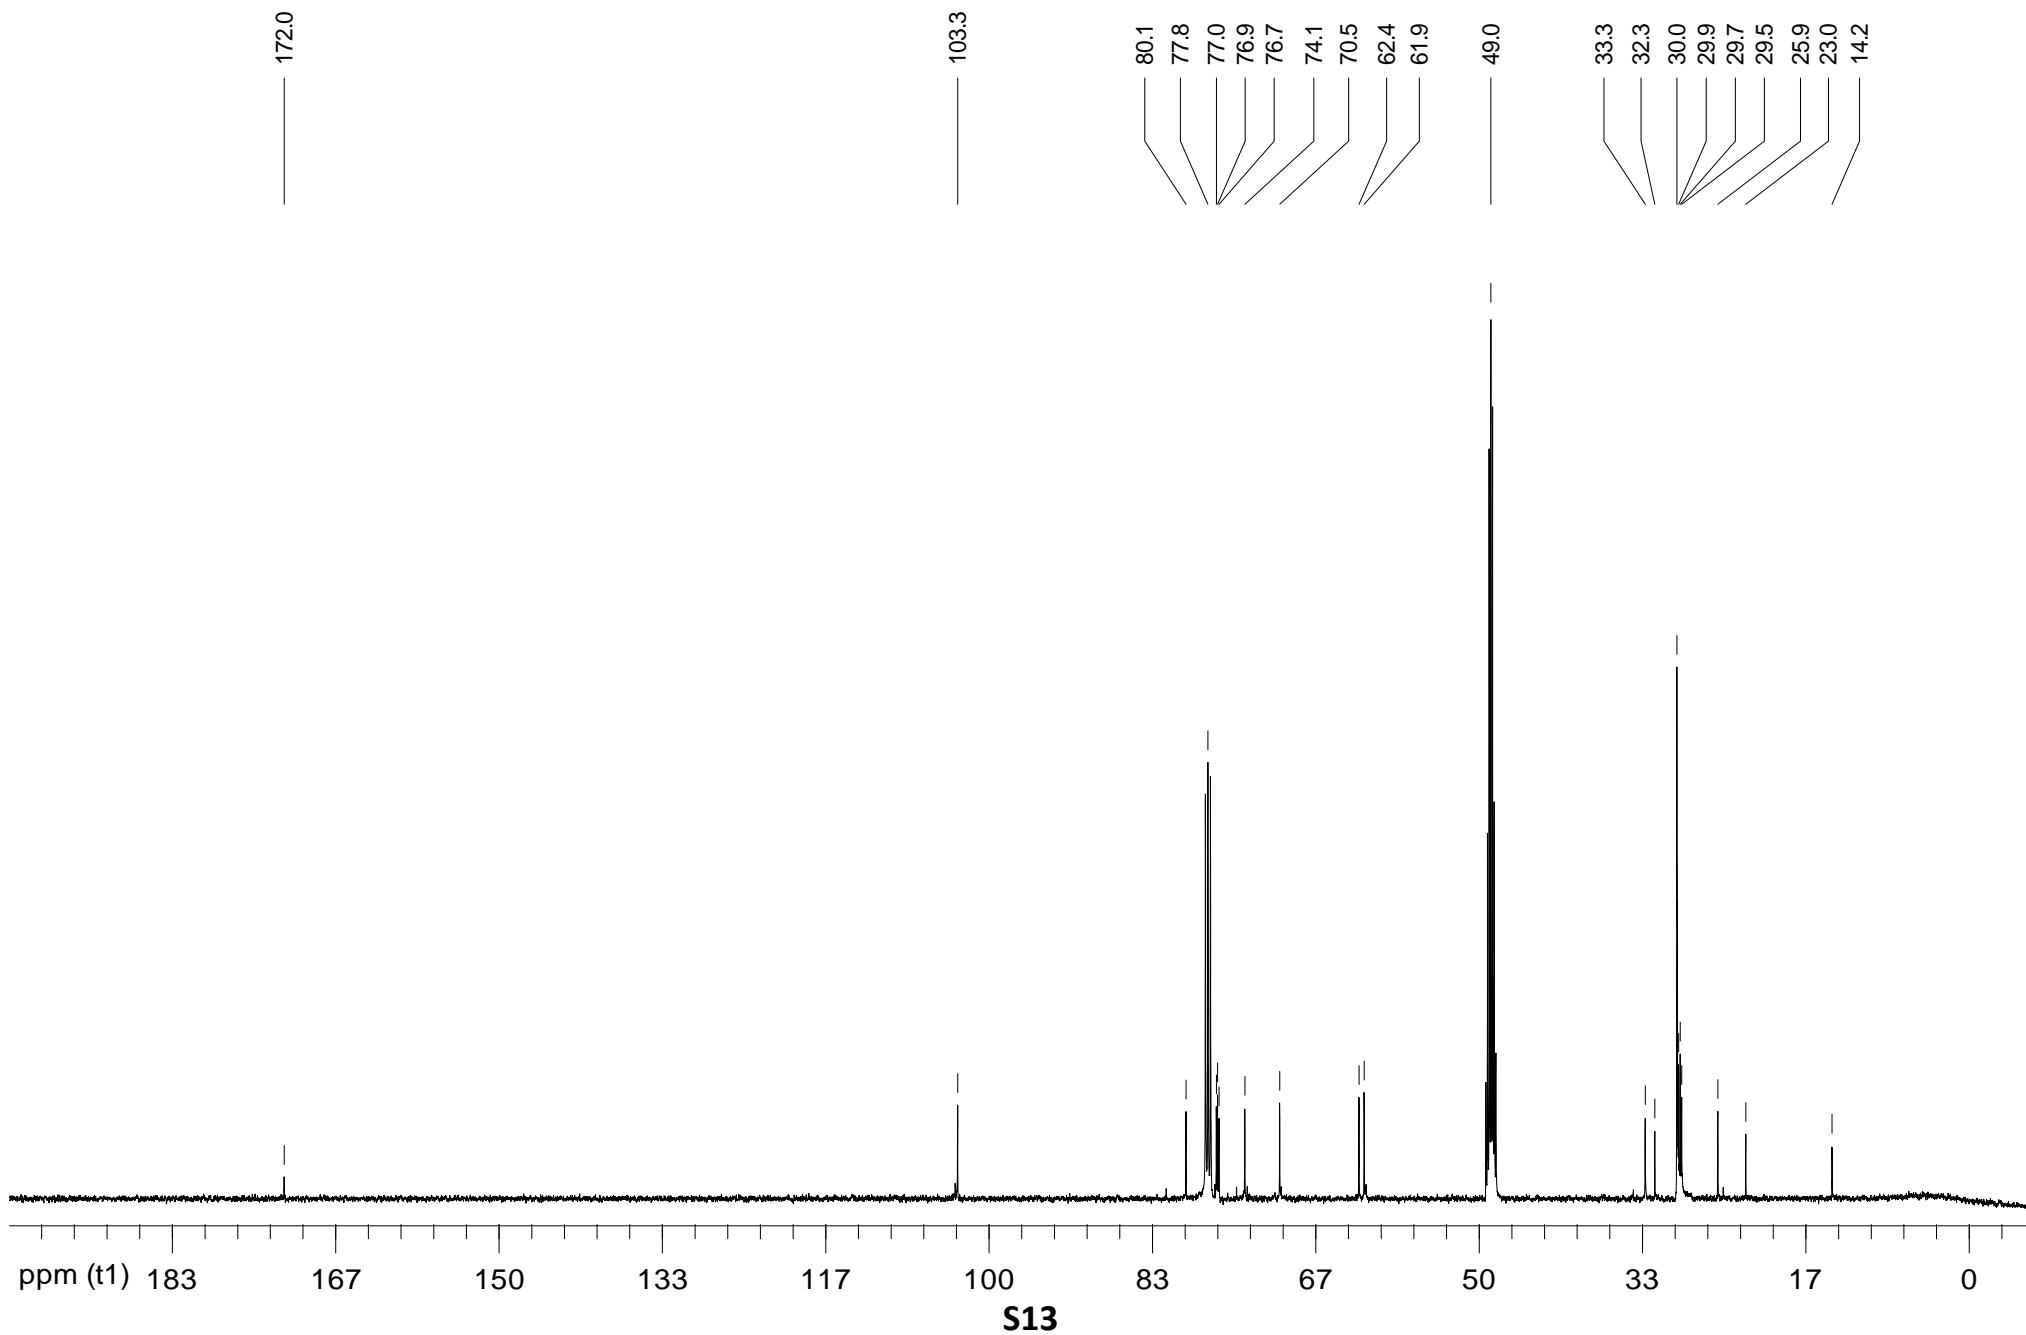

**Compound 5**

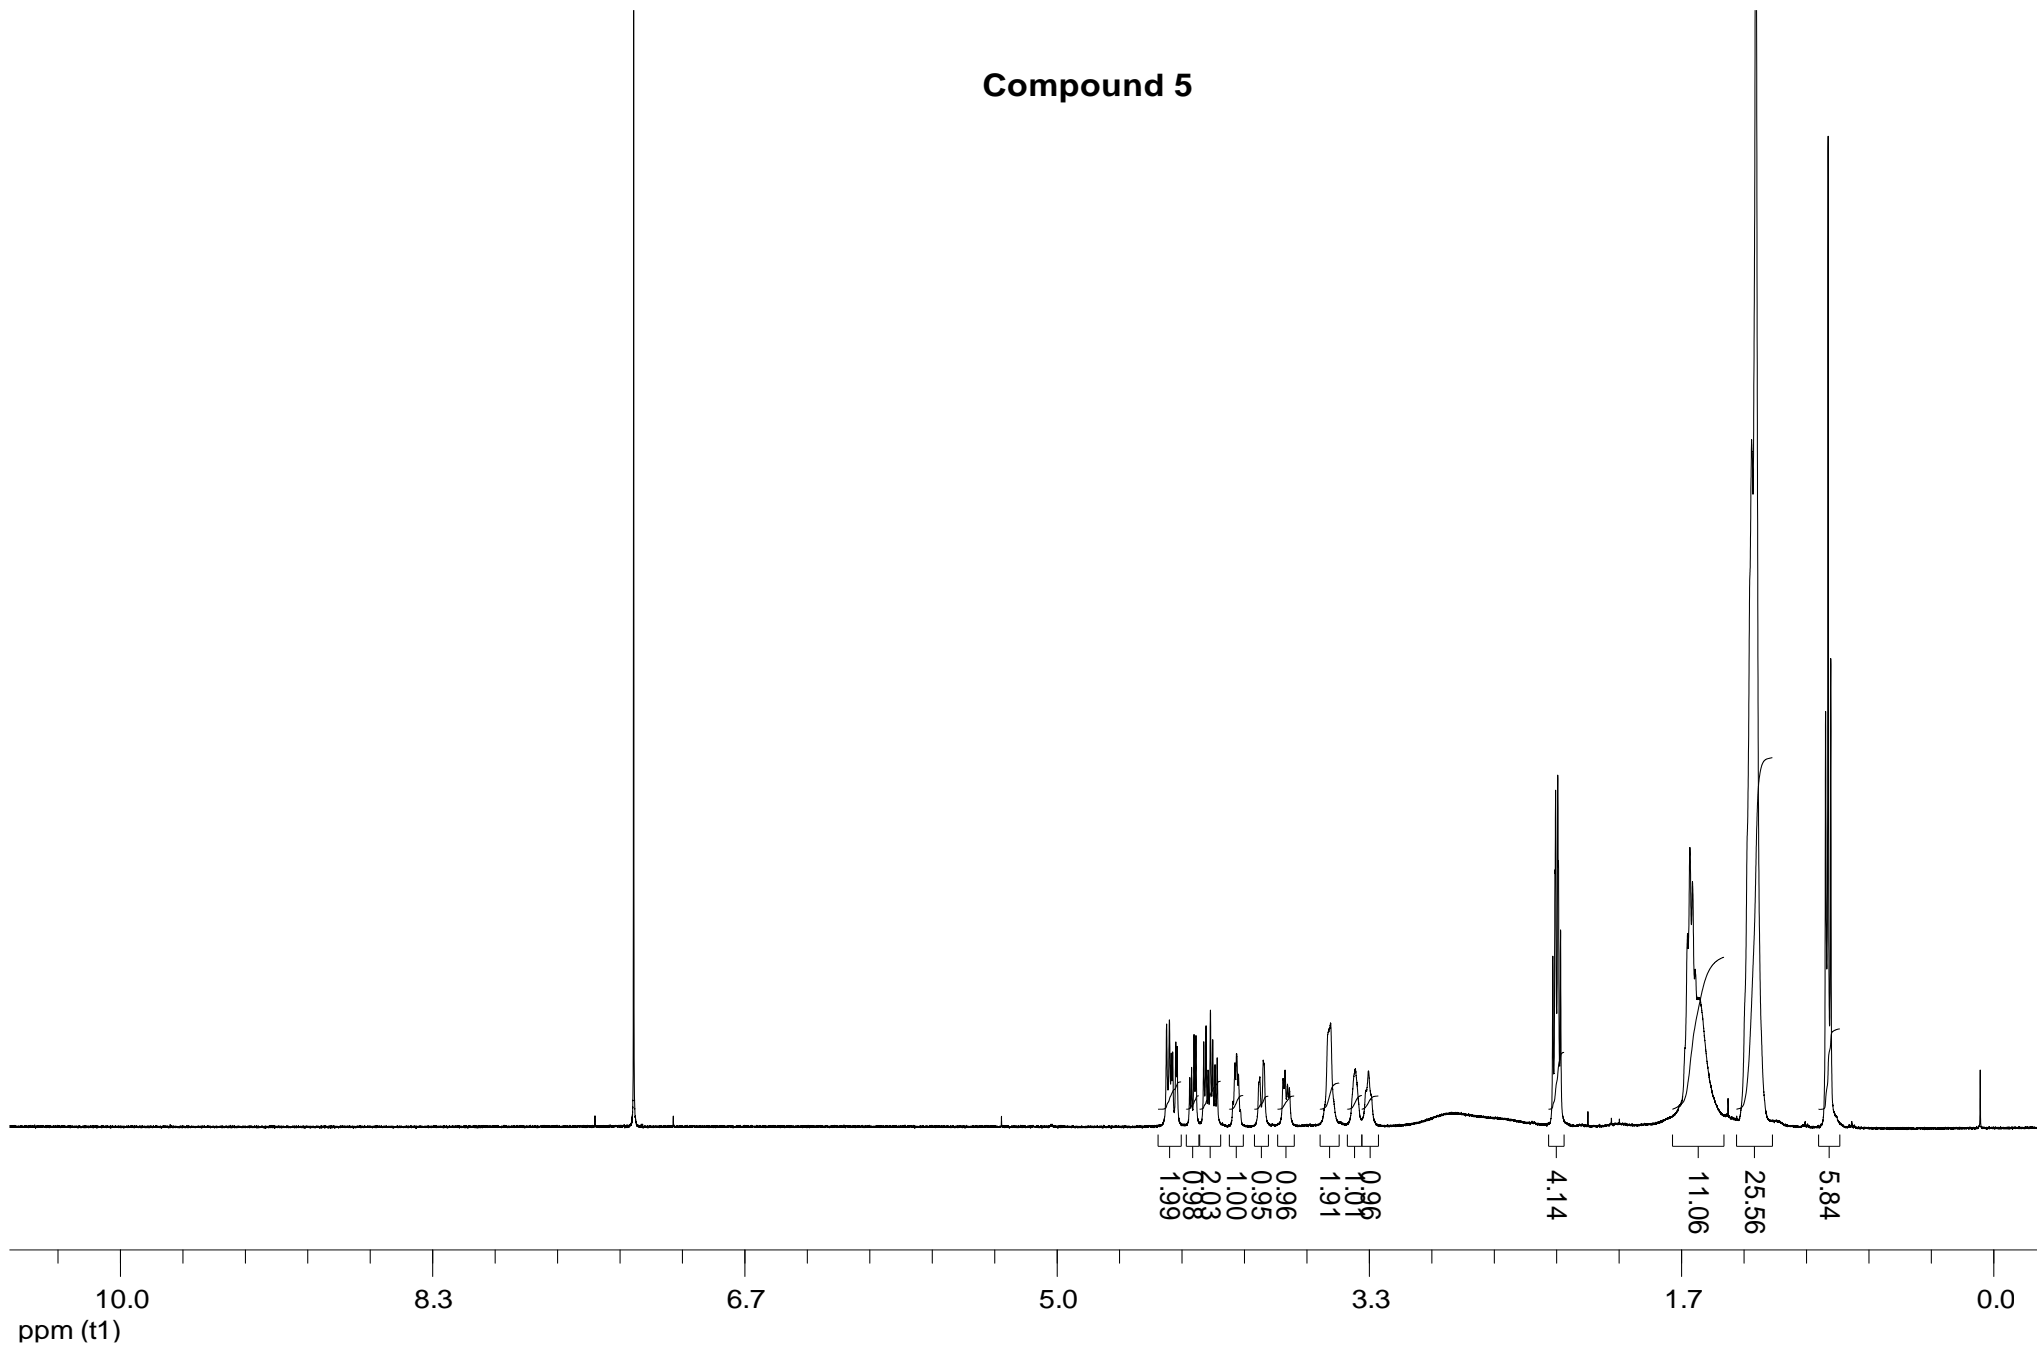

**S14**

**Compound 5**

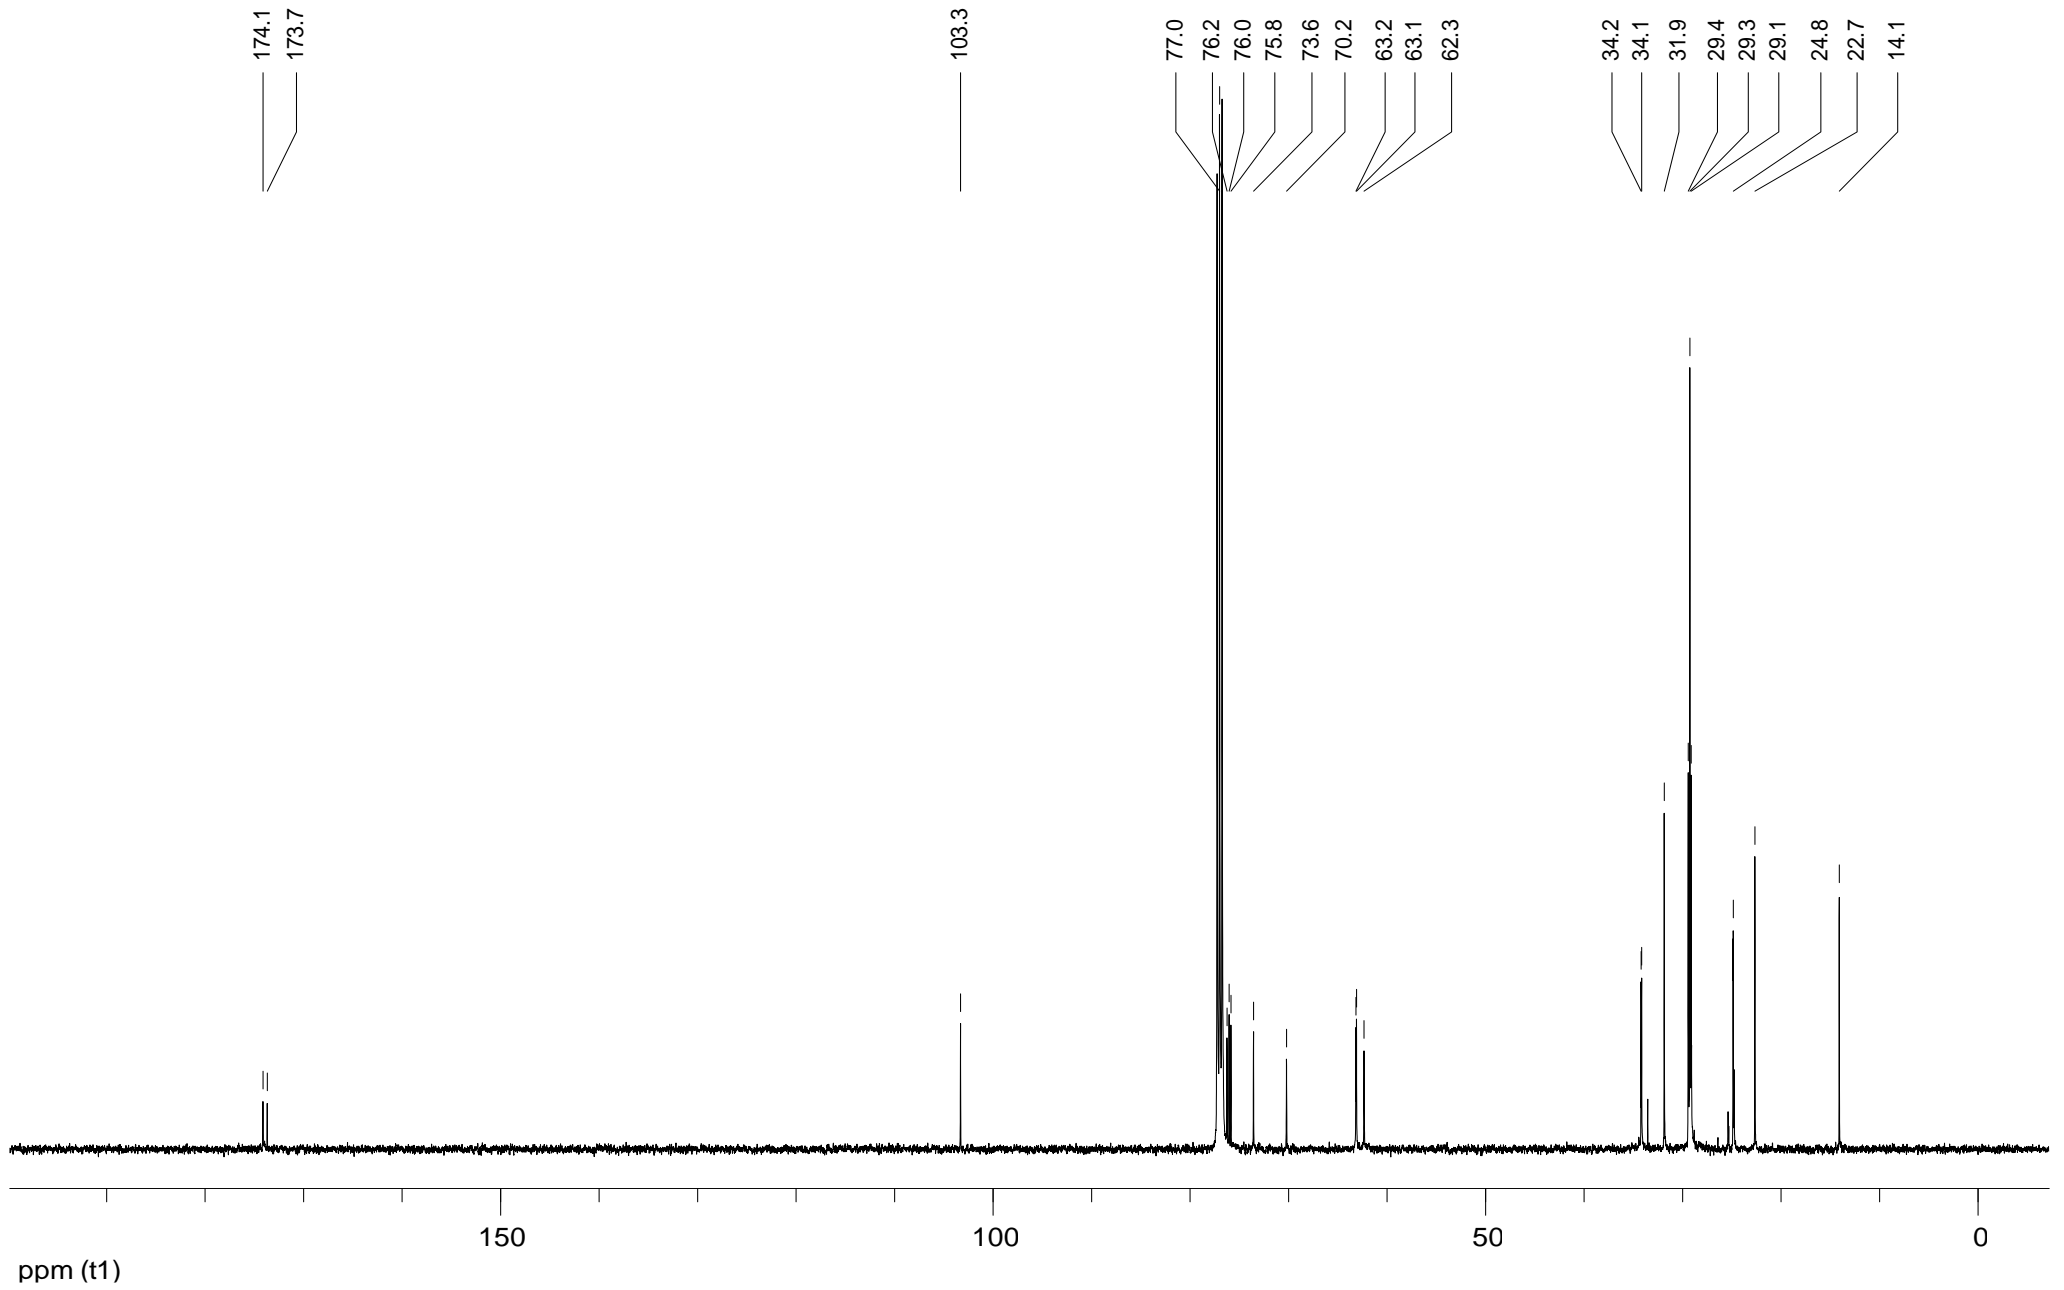

**S15**



# Compound 7

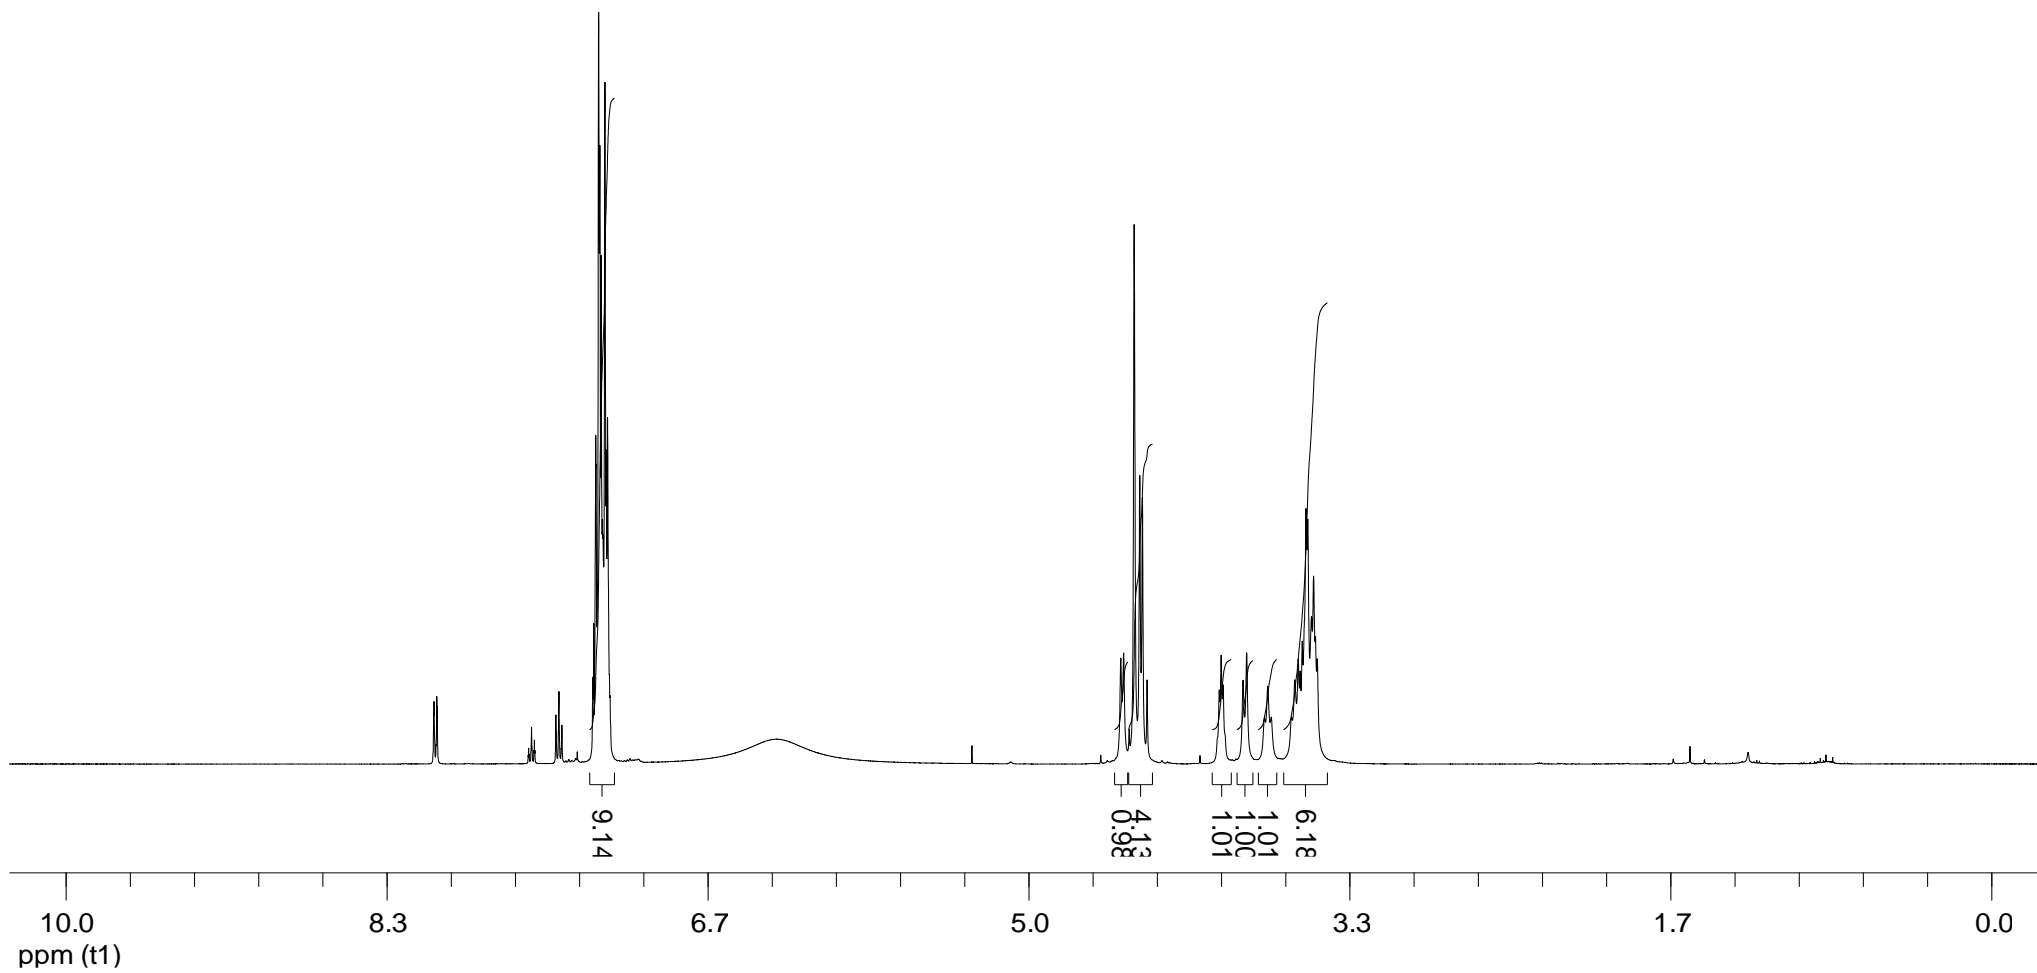

S16

Compound 7

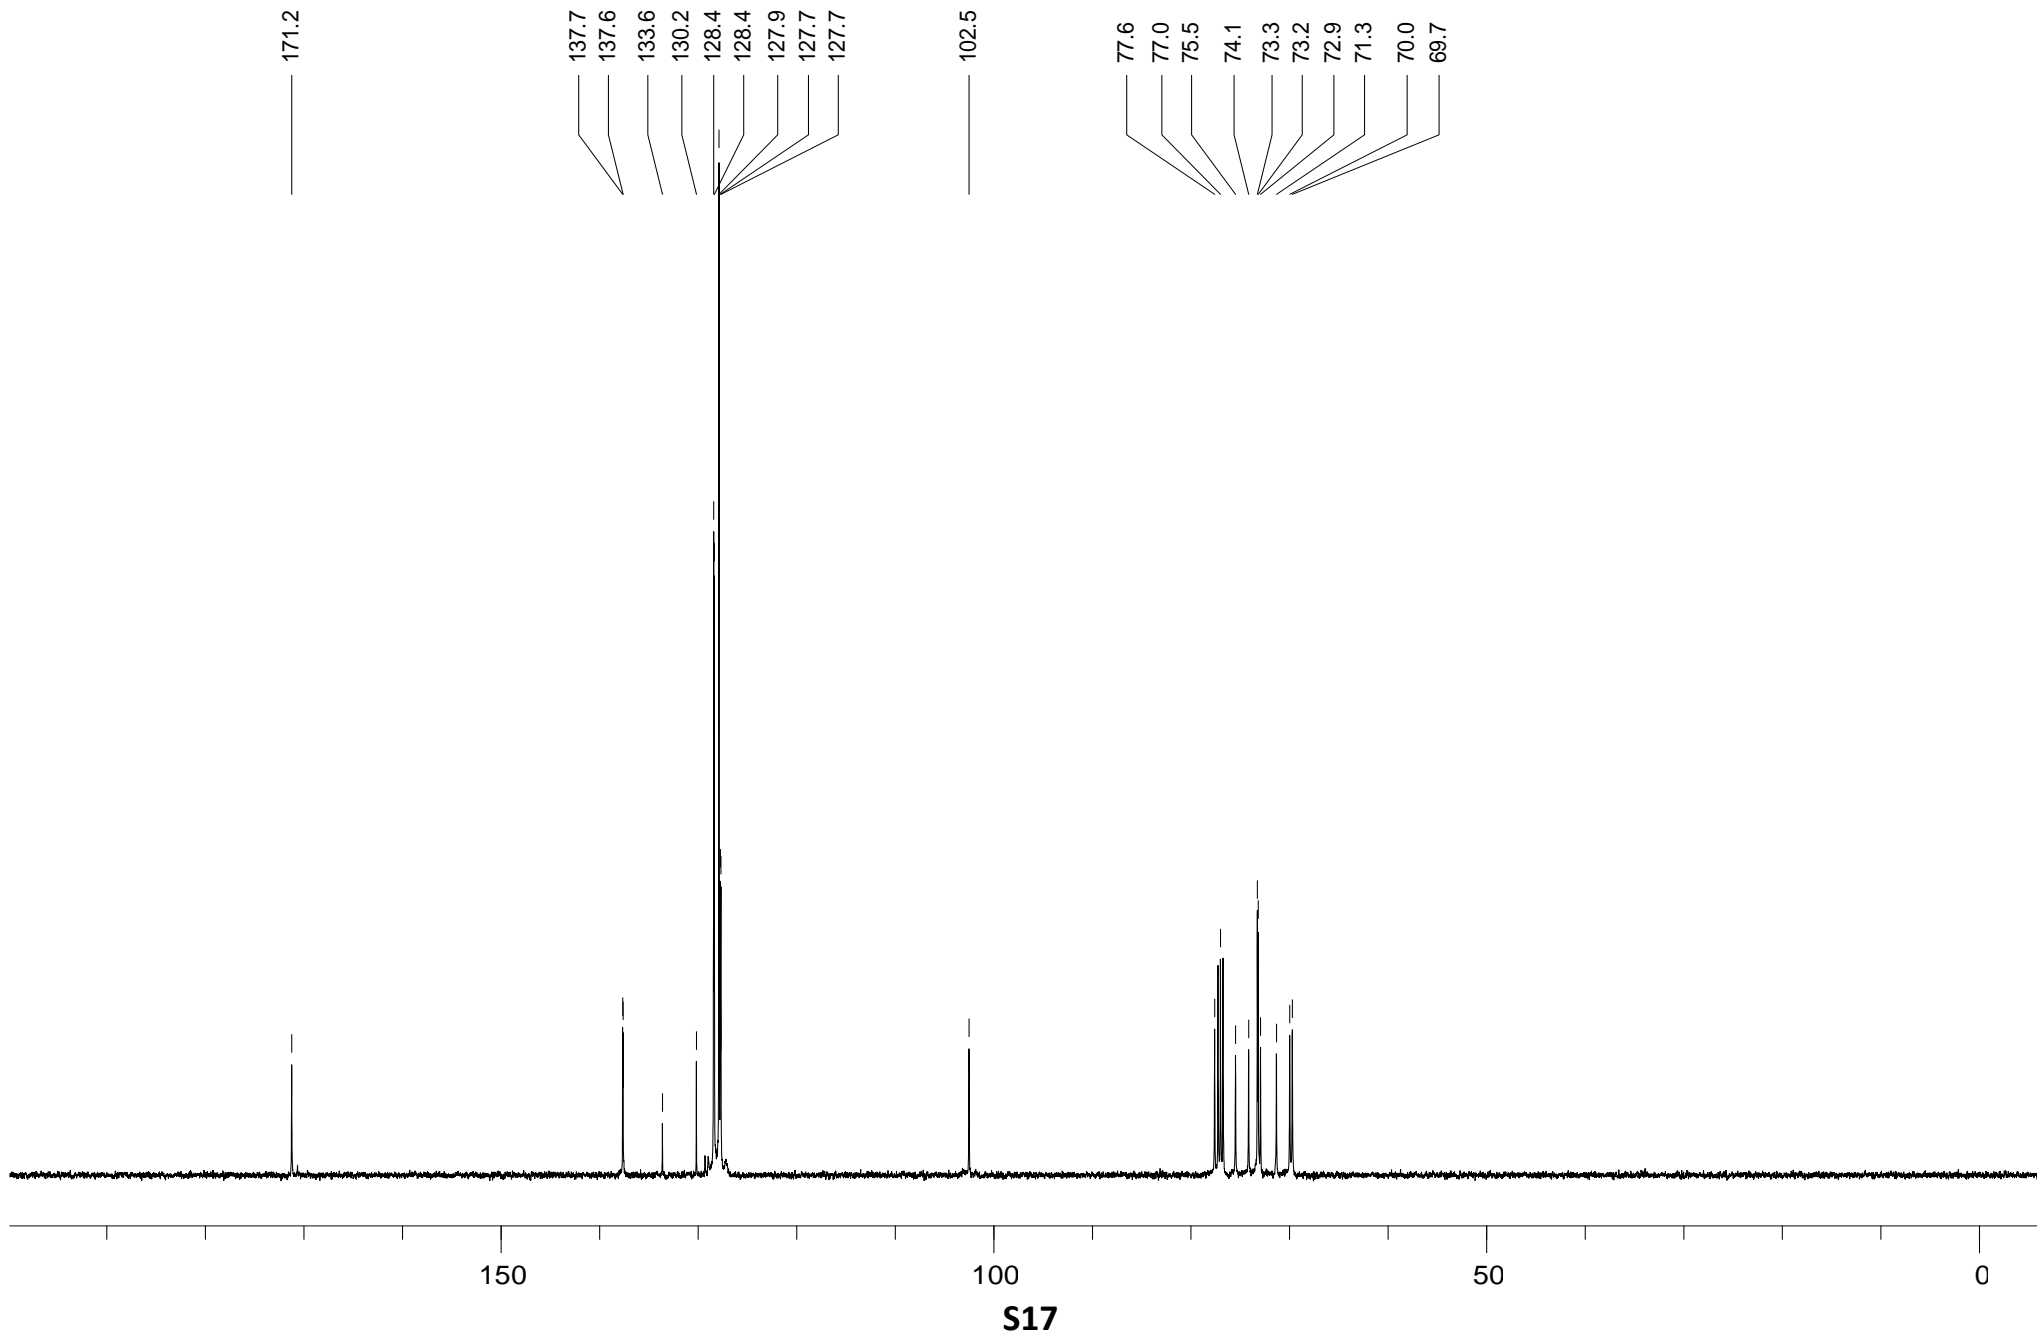

**Compound 8**

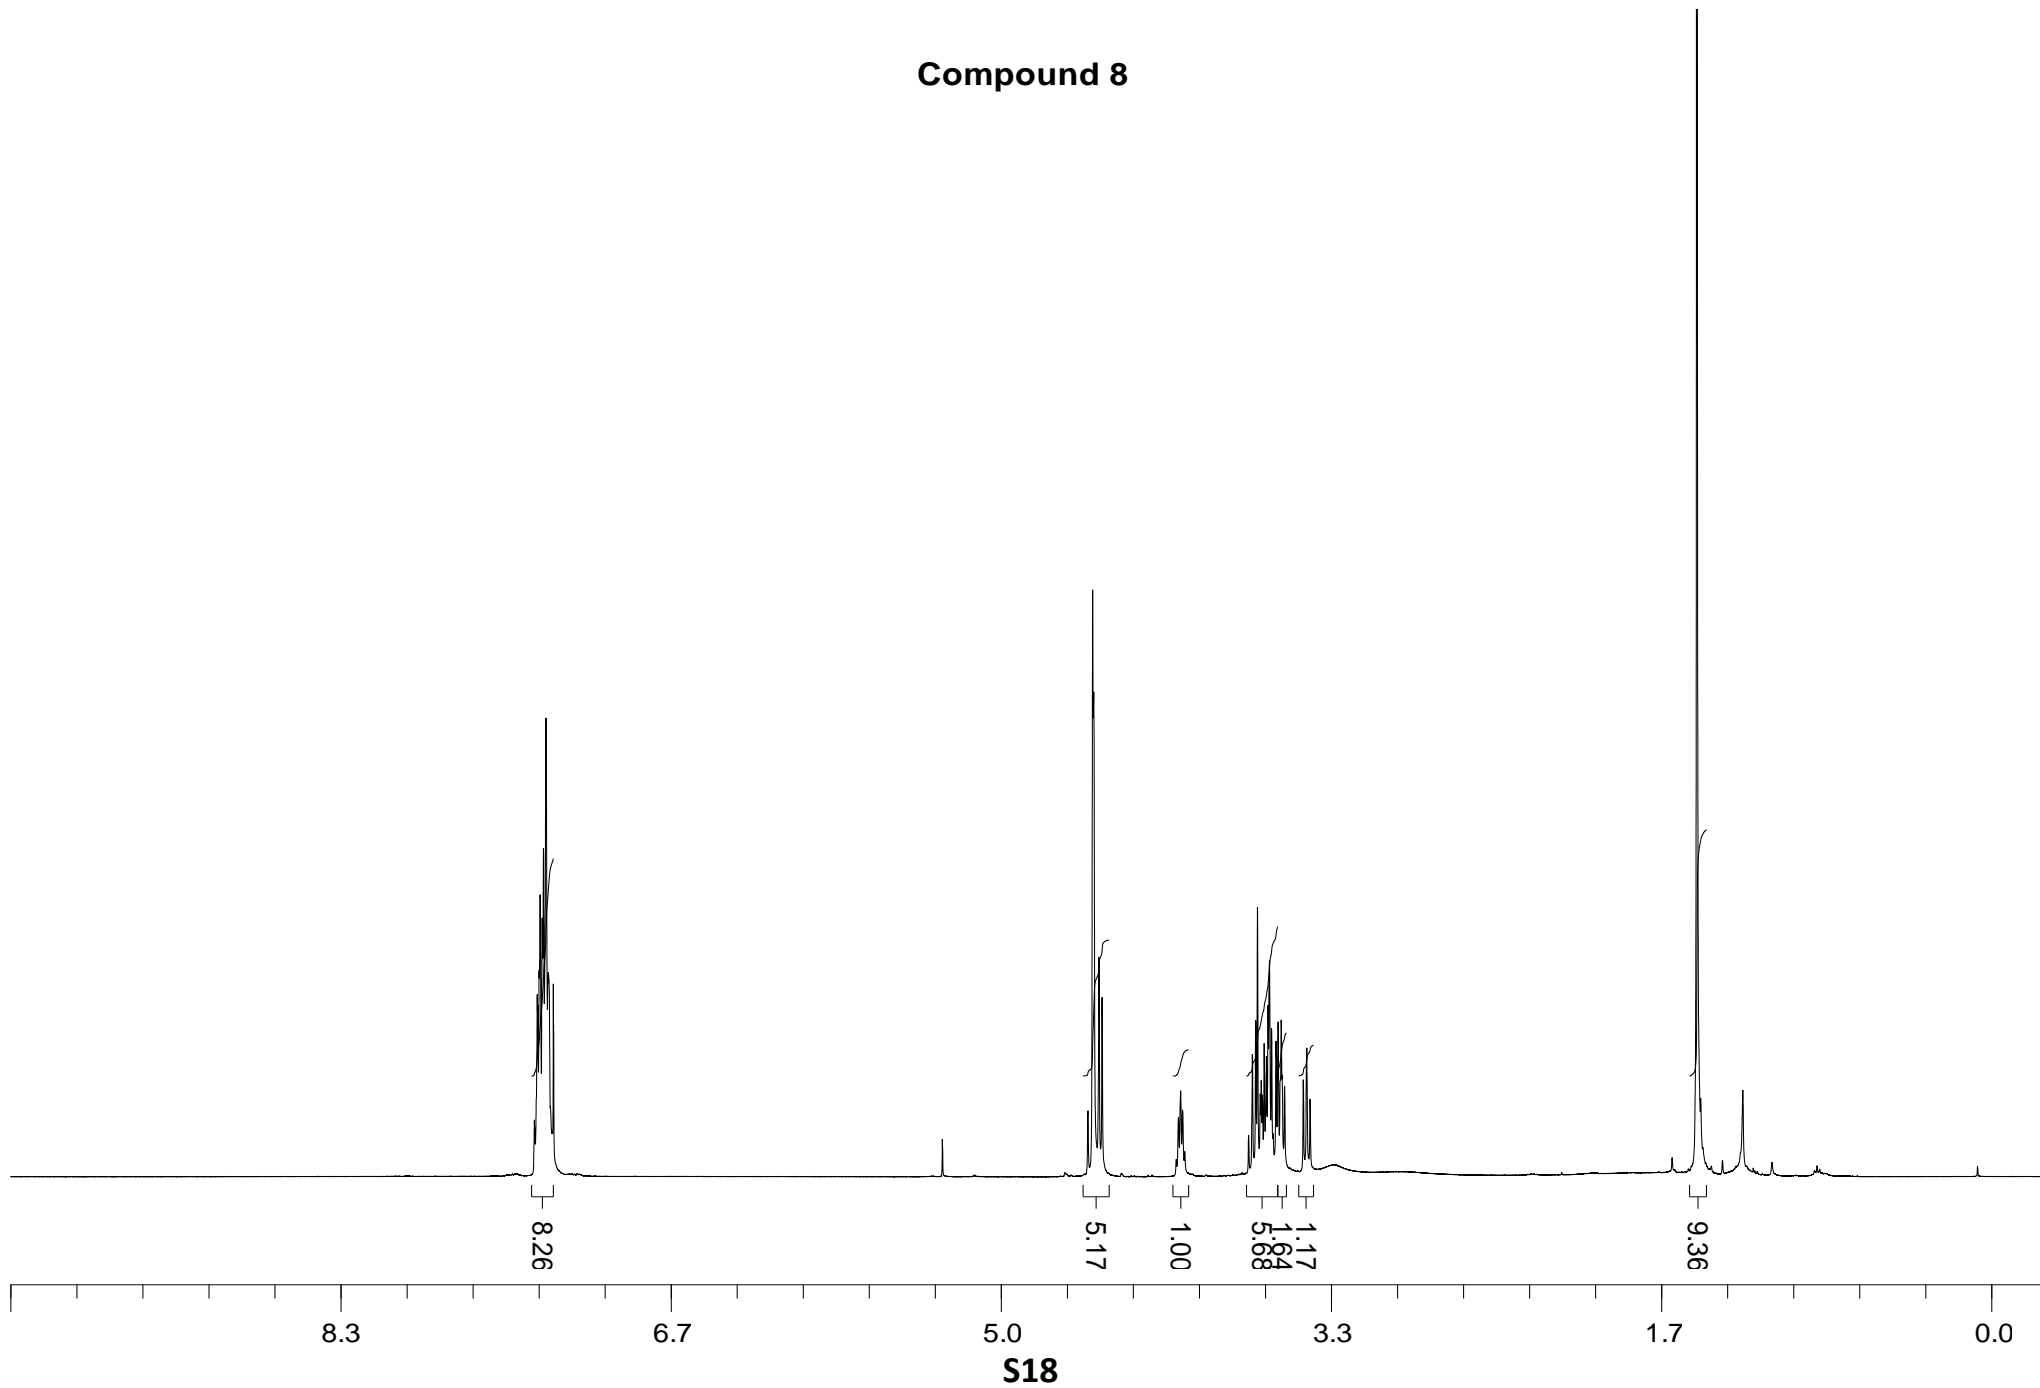

Compound 8

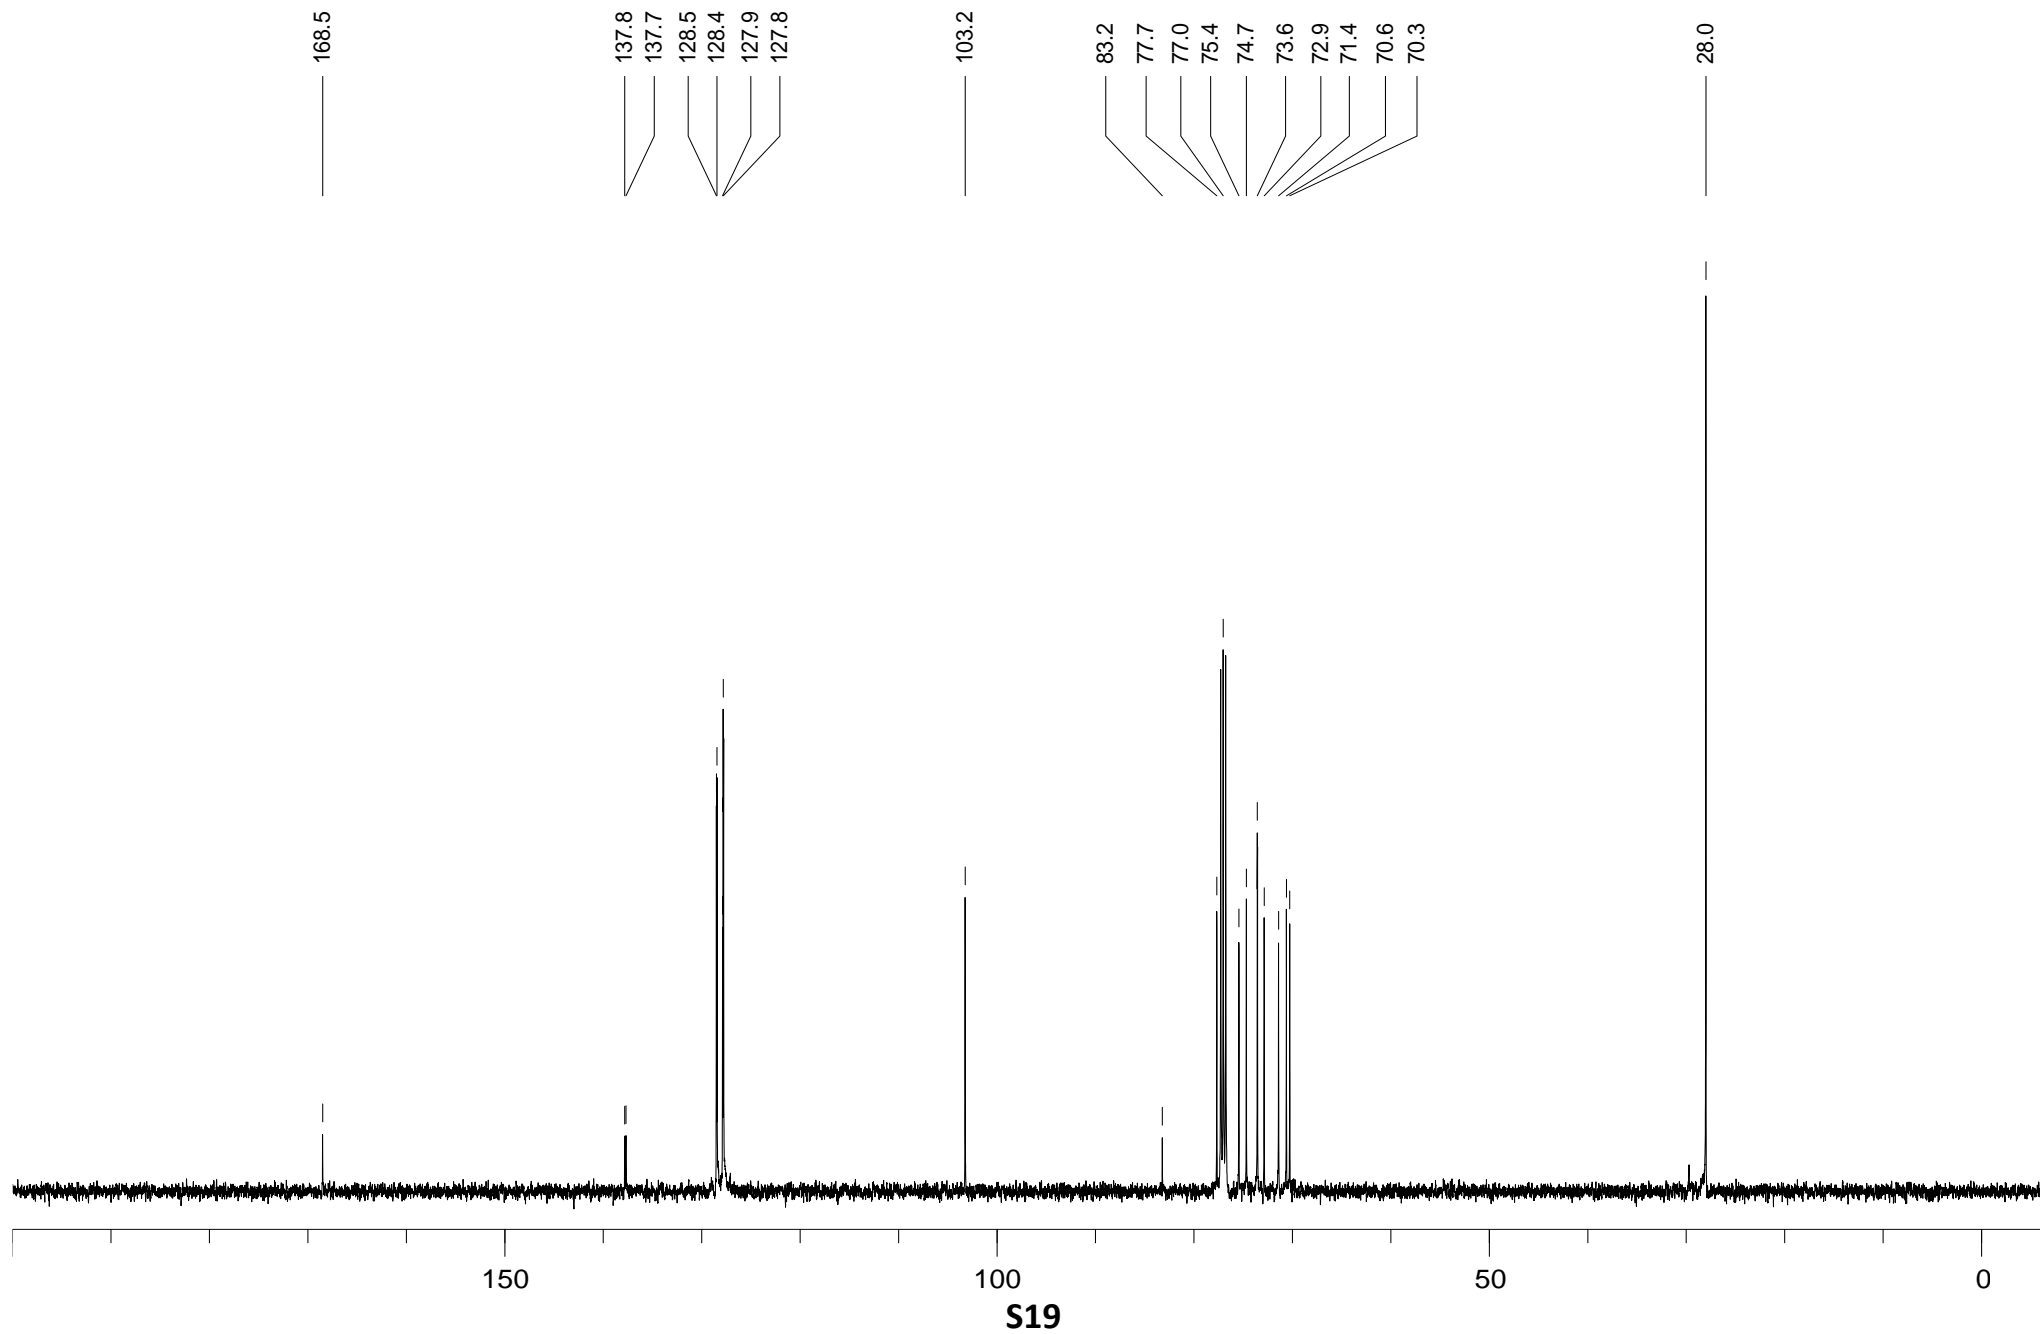

Compound 9

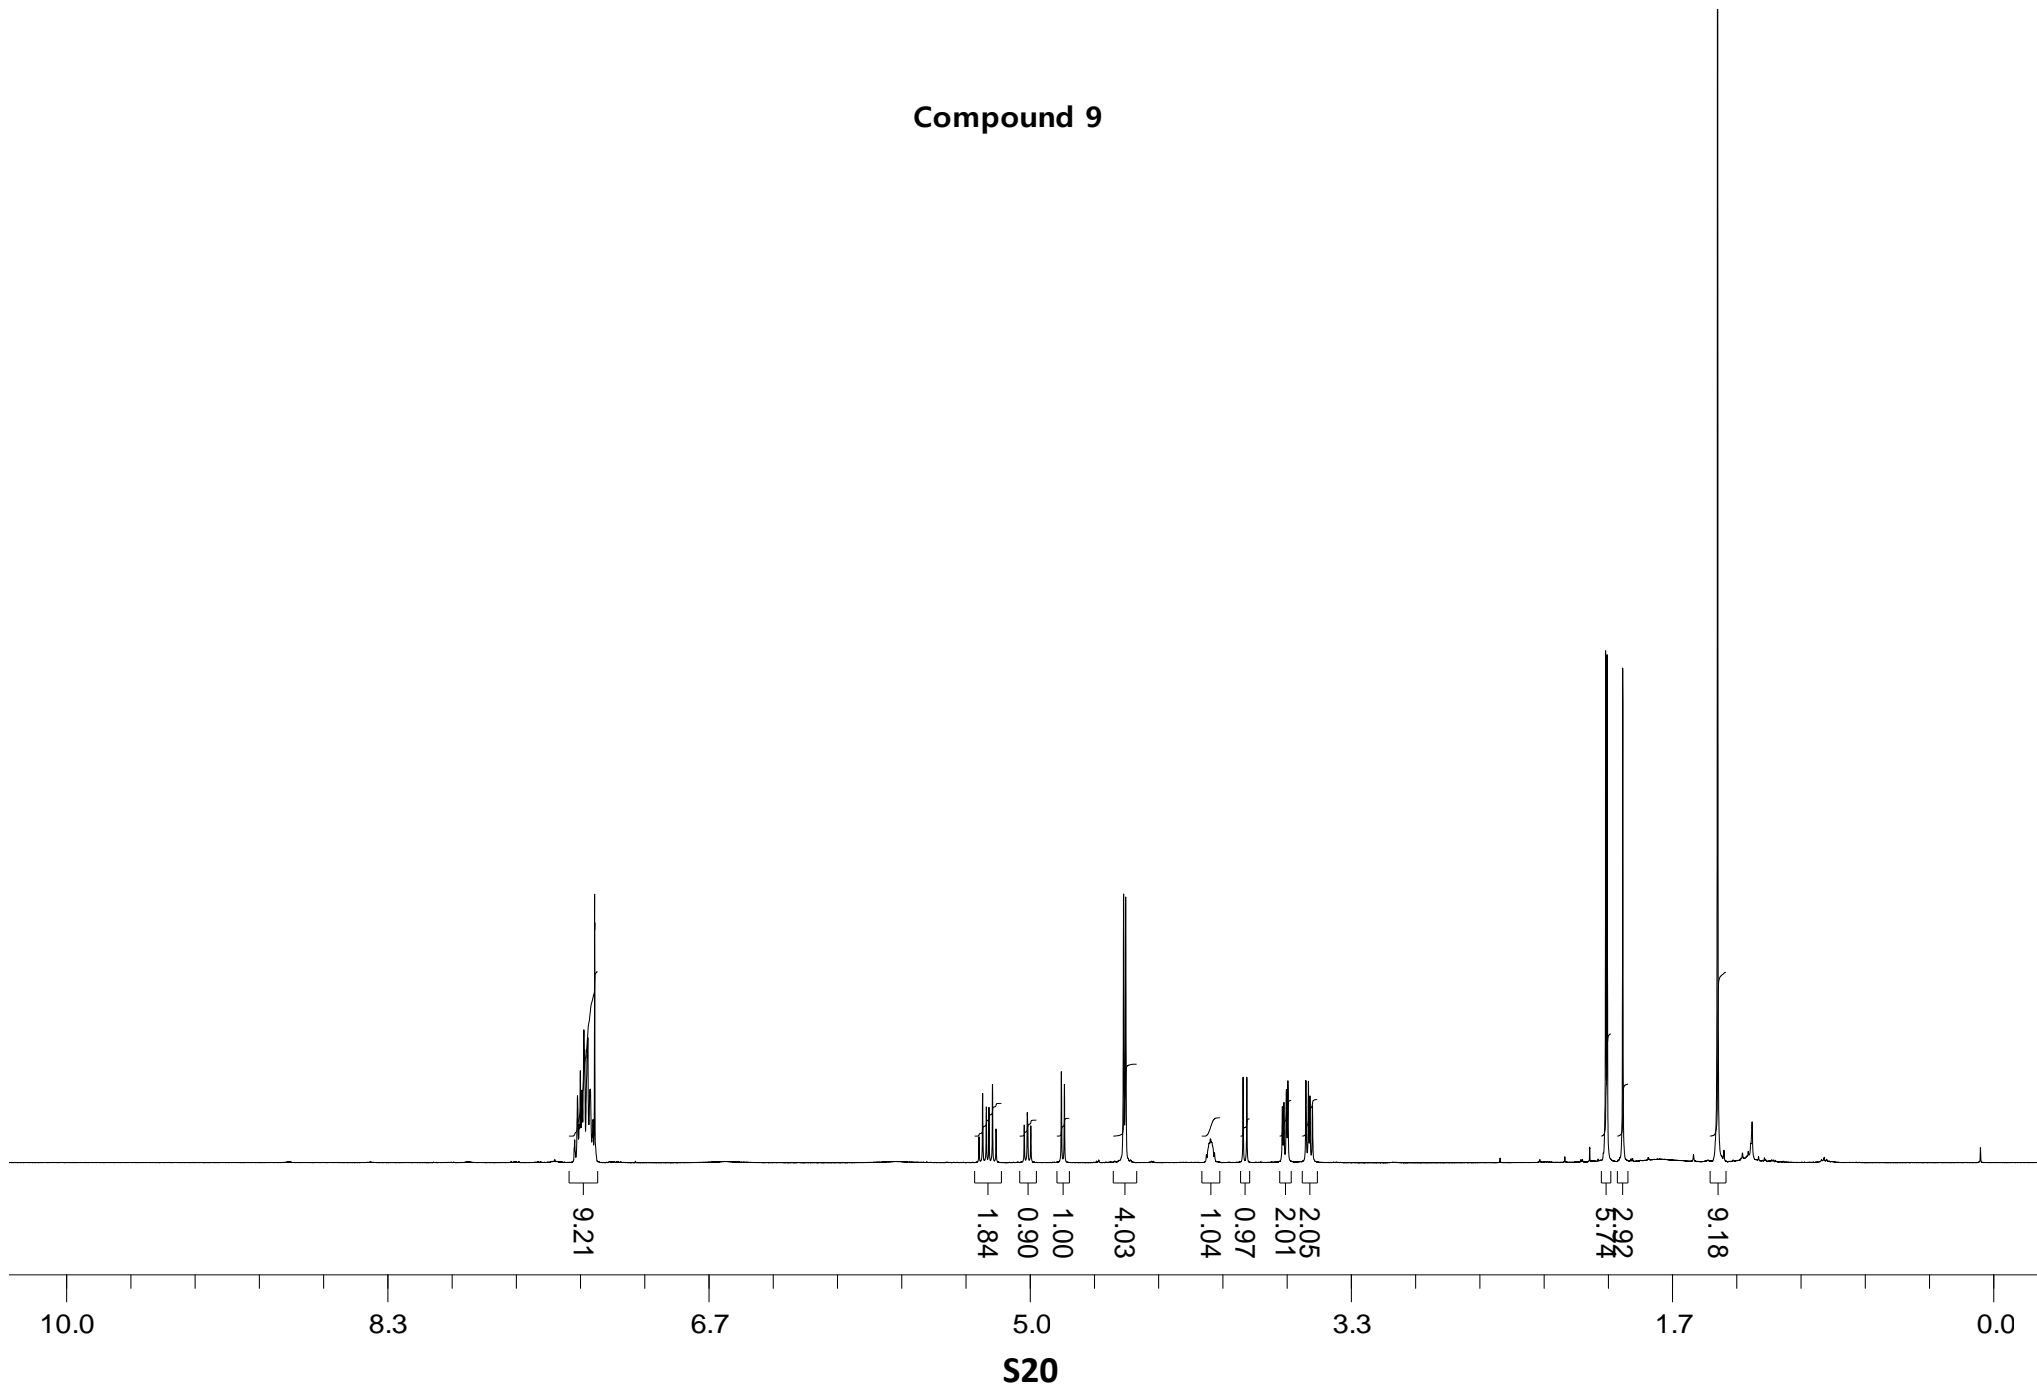

**Compound 9**

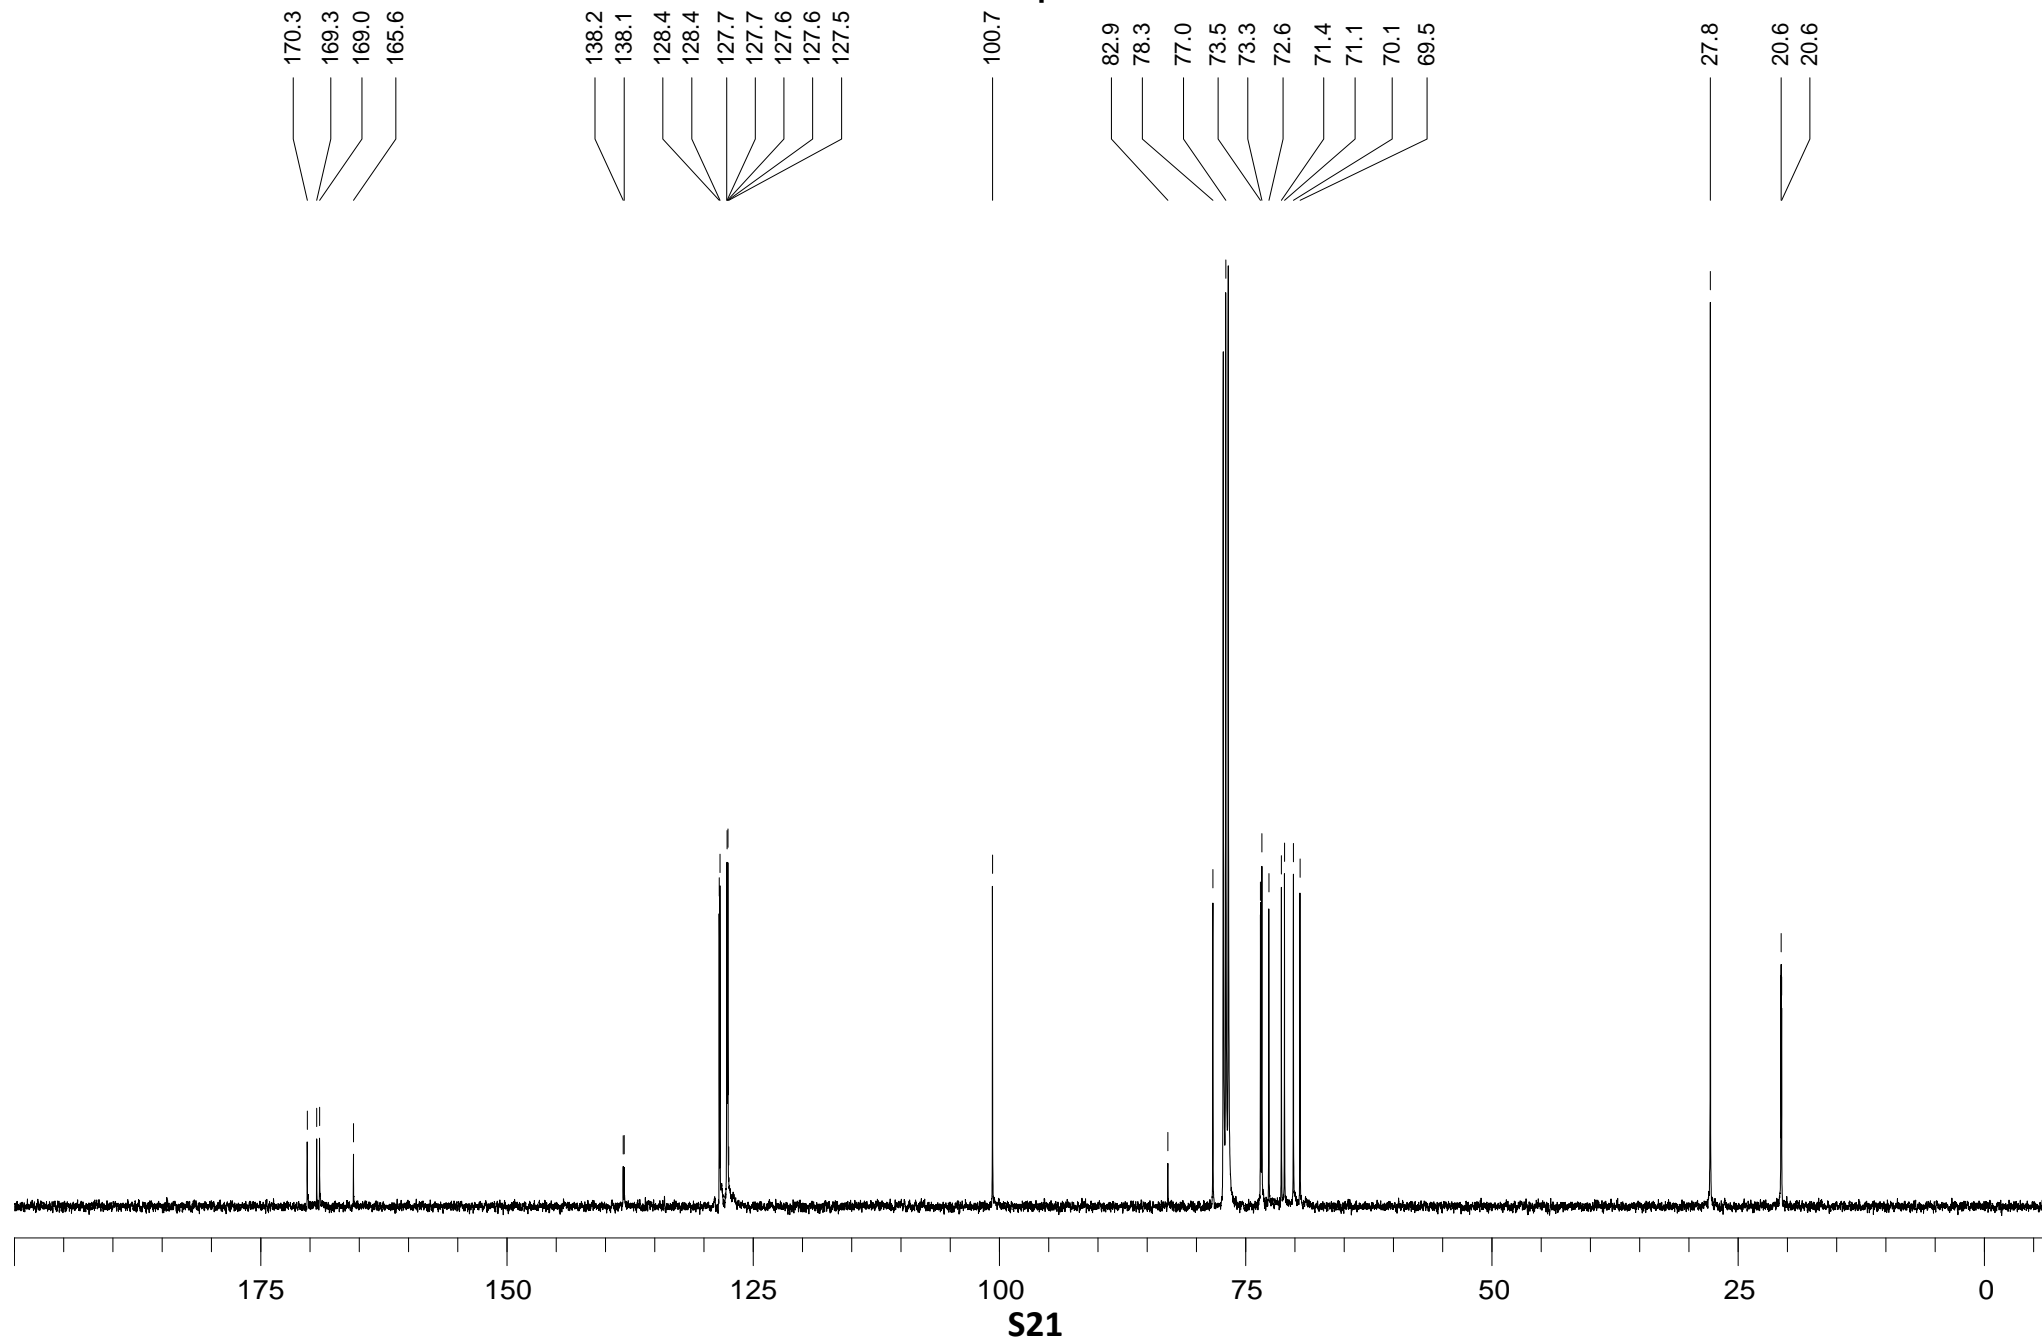

Compound 10

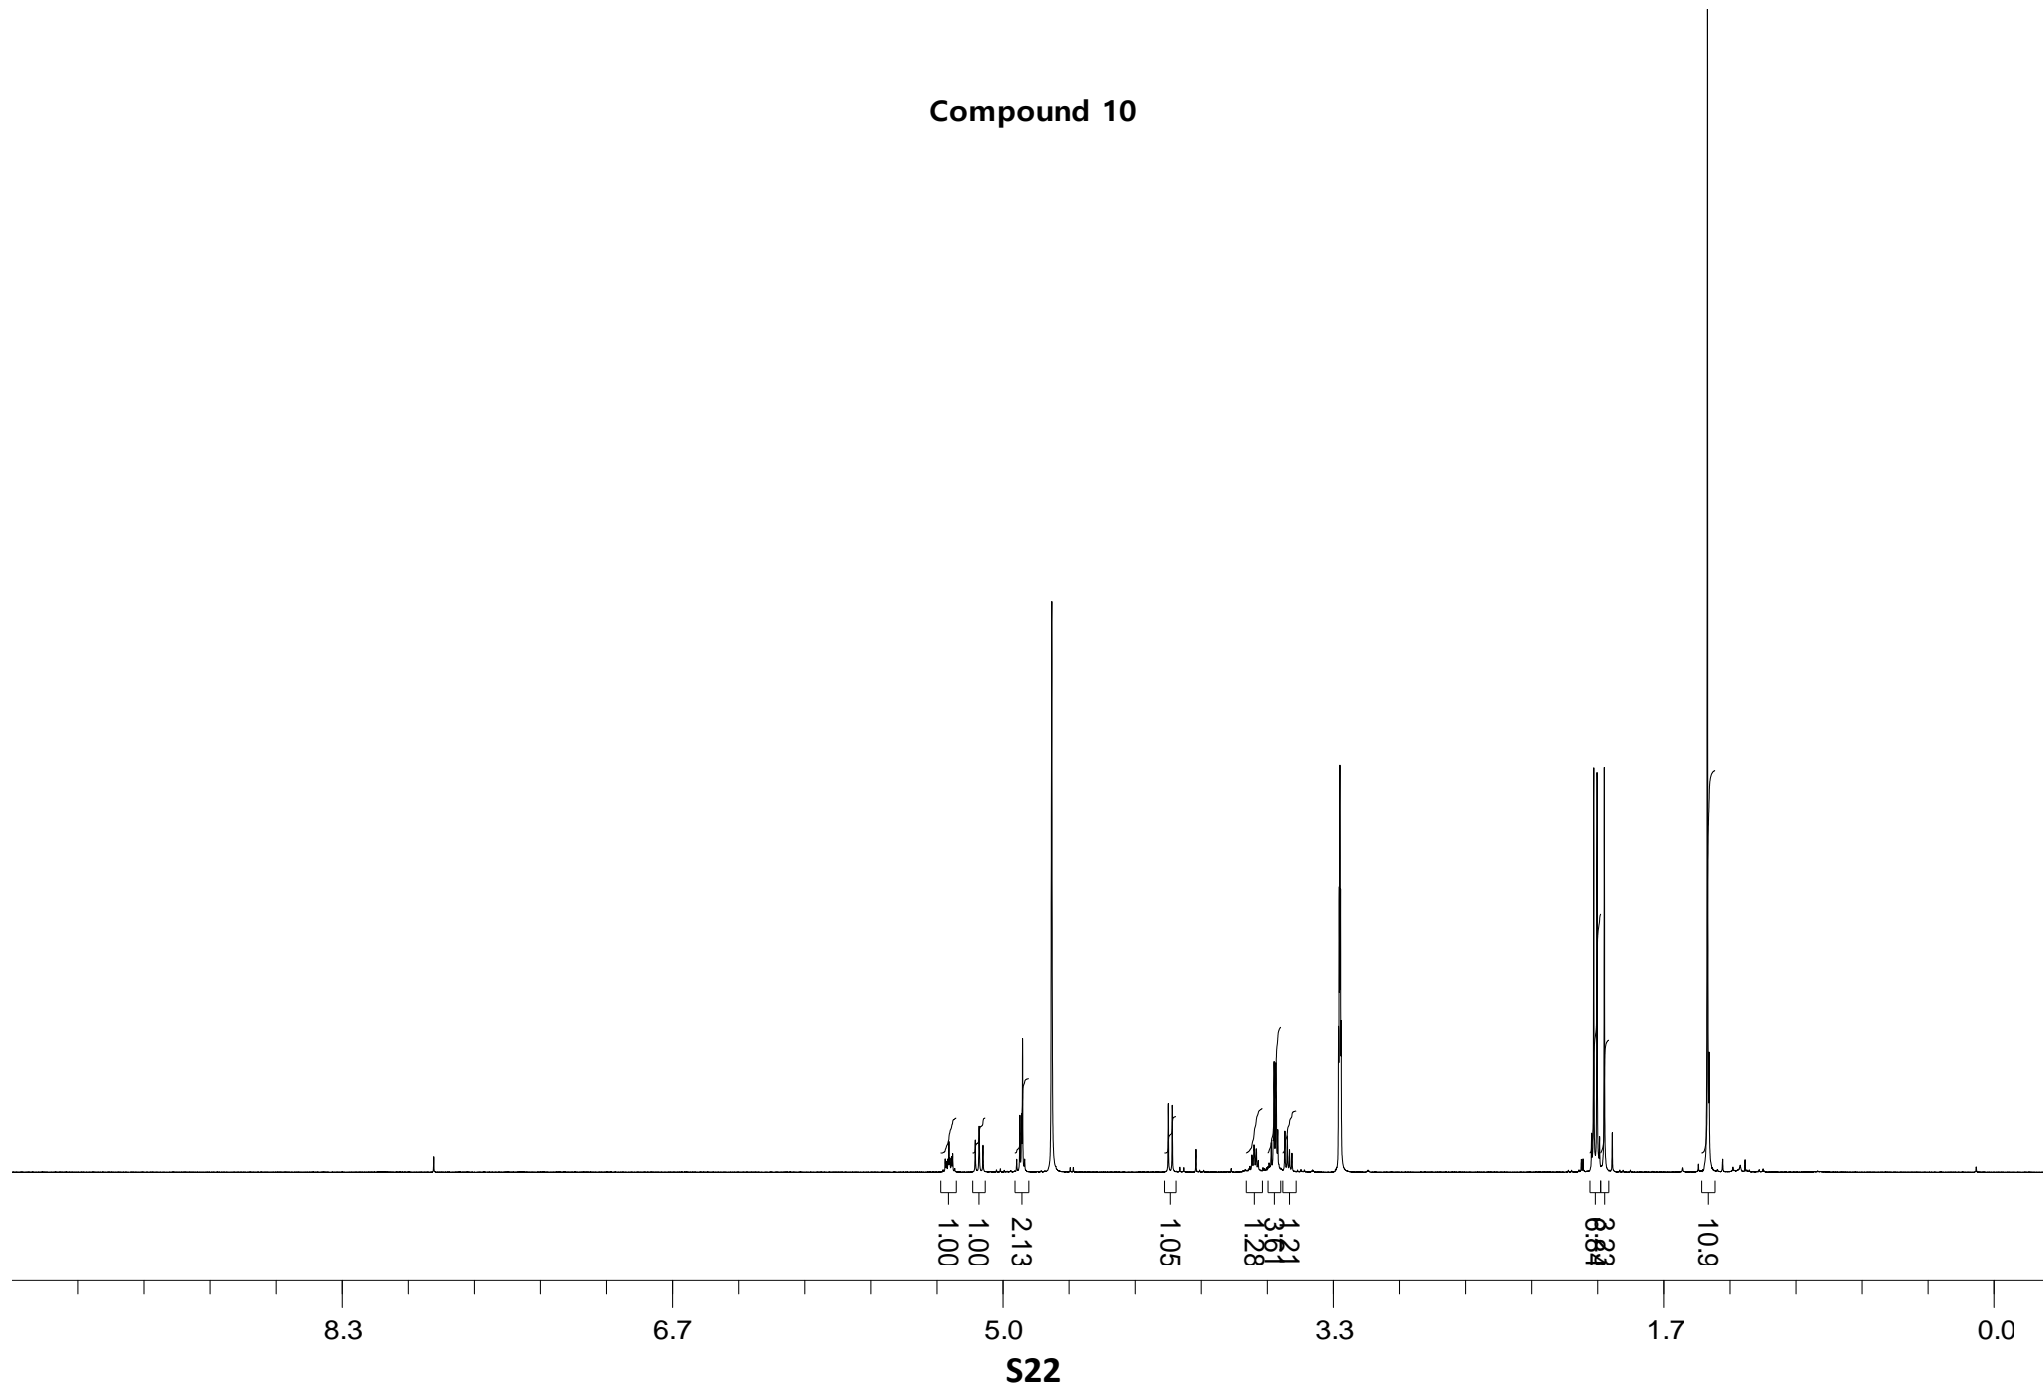

Compound 10

171.5  
171.3  
170.8  
167.9

101.8

84.4  
83.8

73.9  
73.8

72.8  
70.8

63.1  
62.6

49.0

28.1

20.6  
20.5

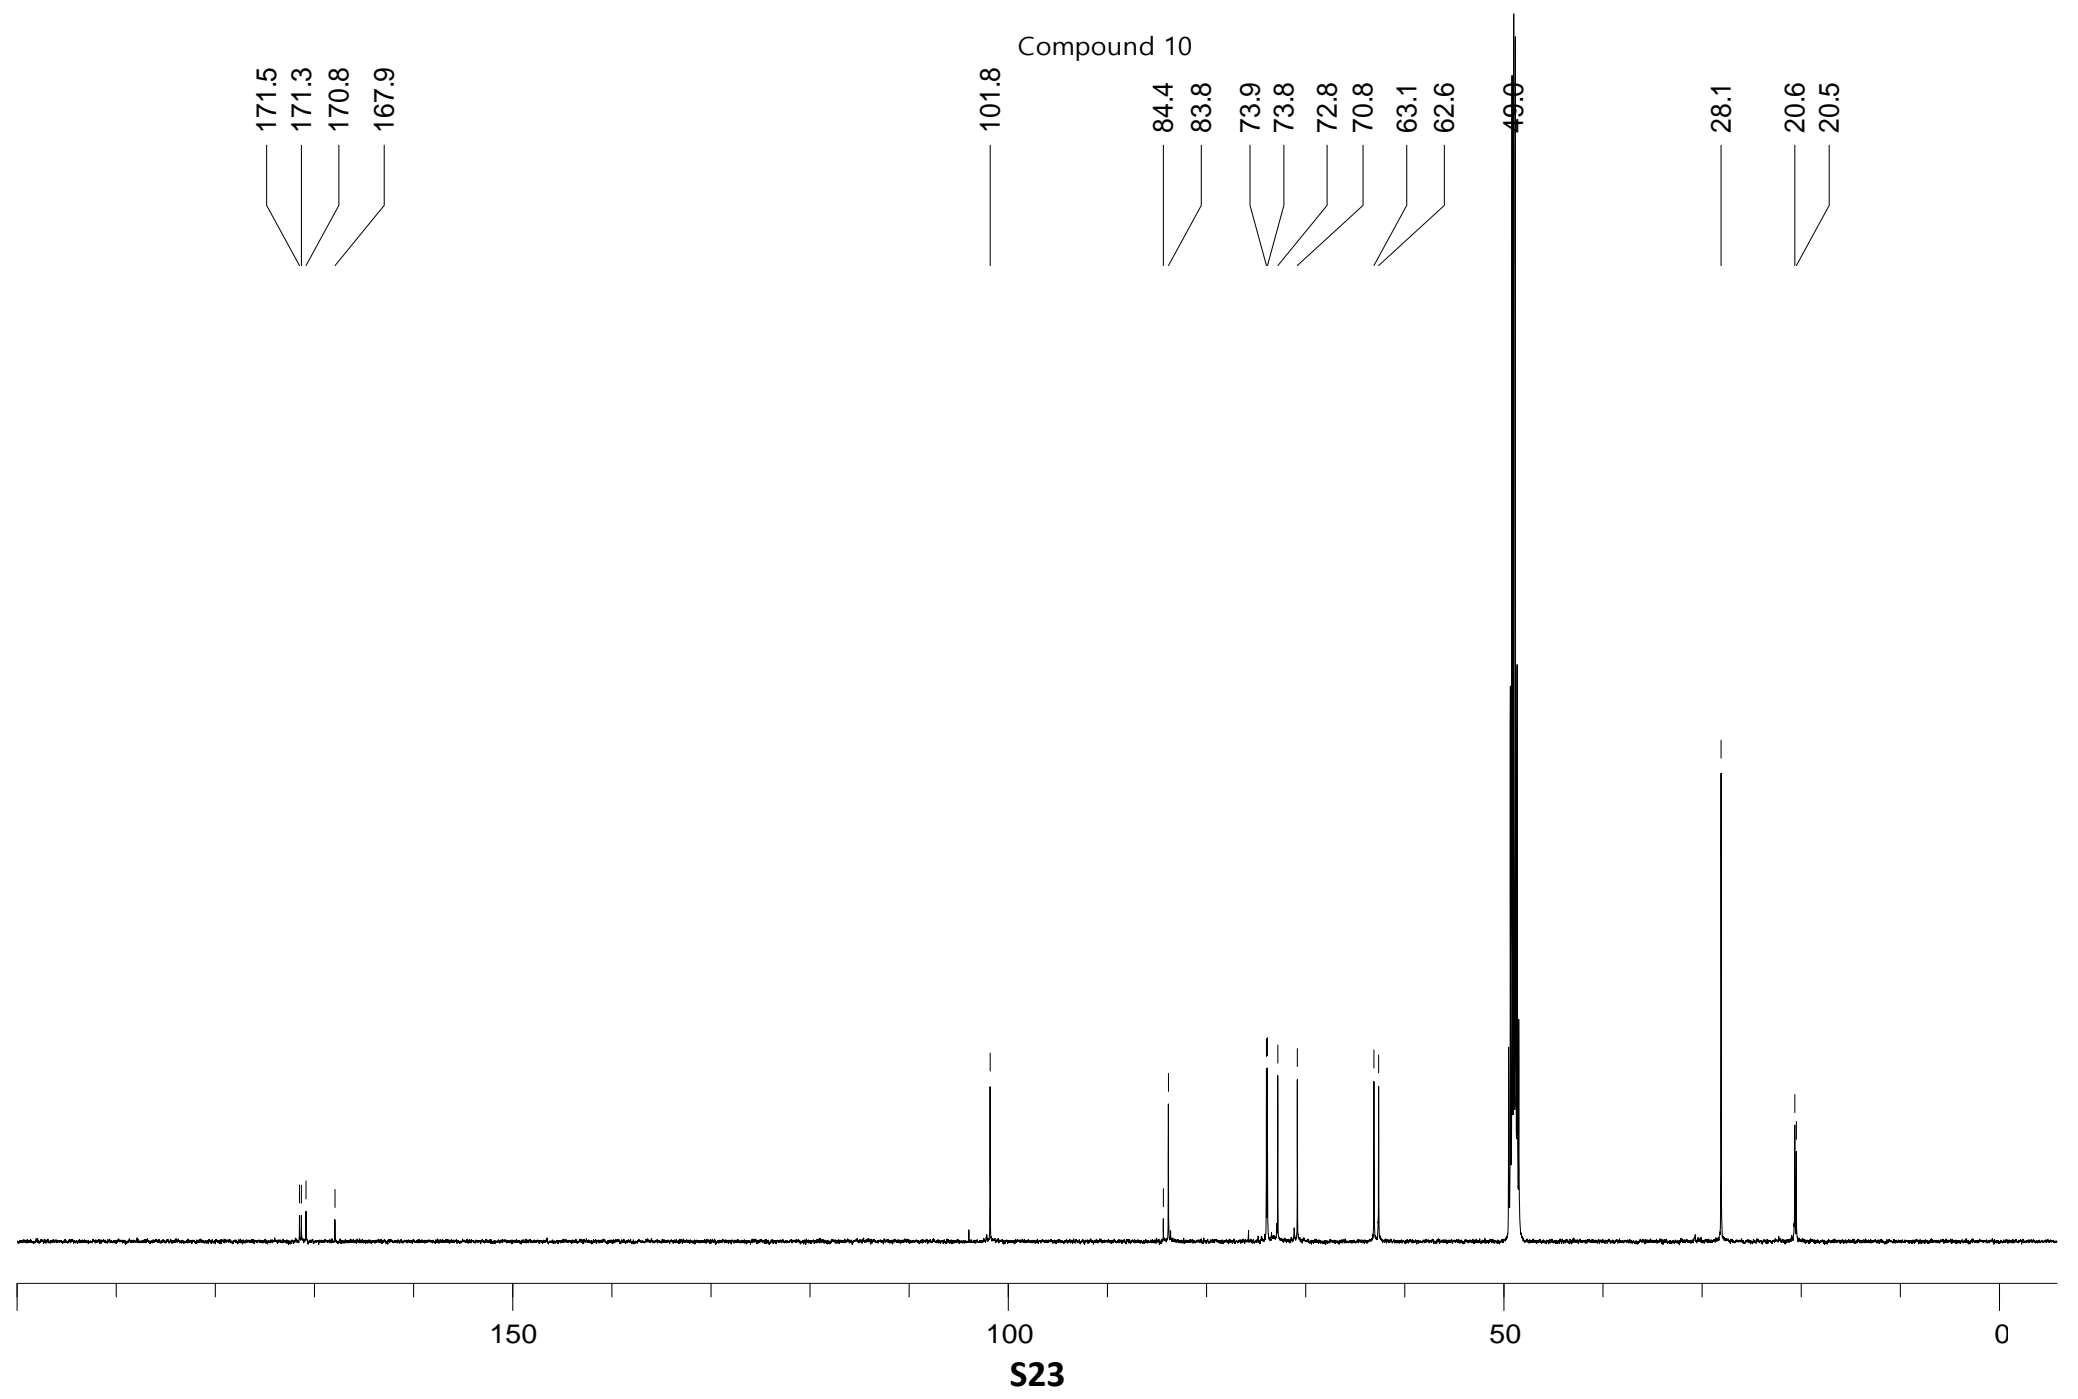



Compound 11

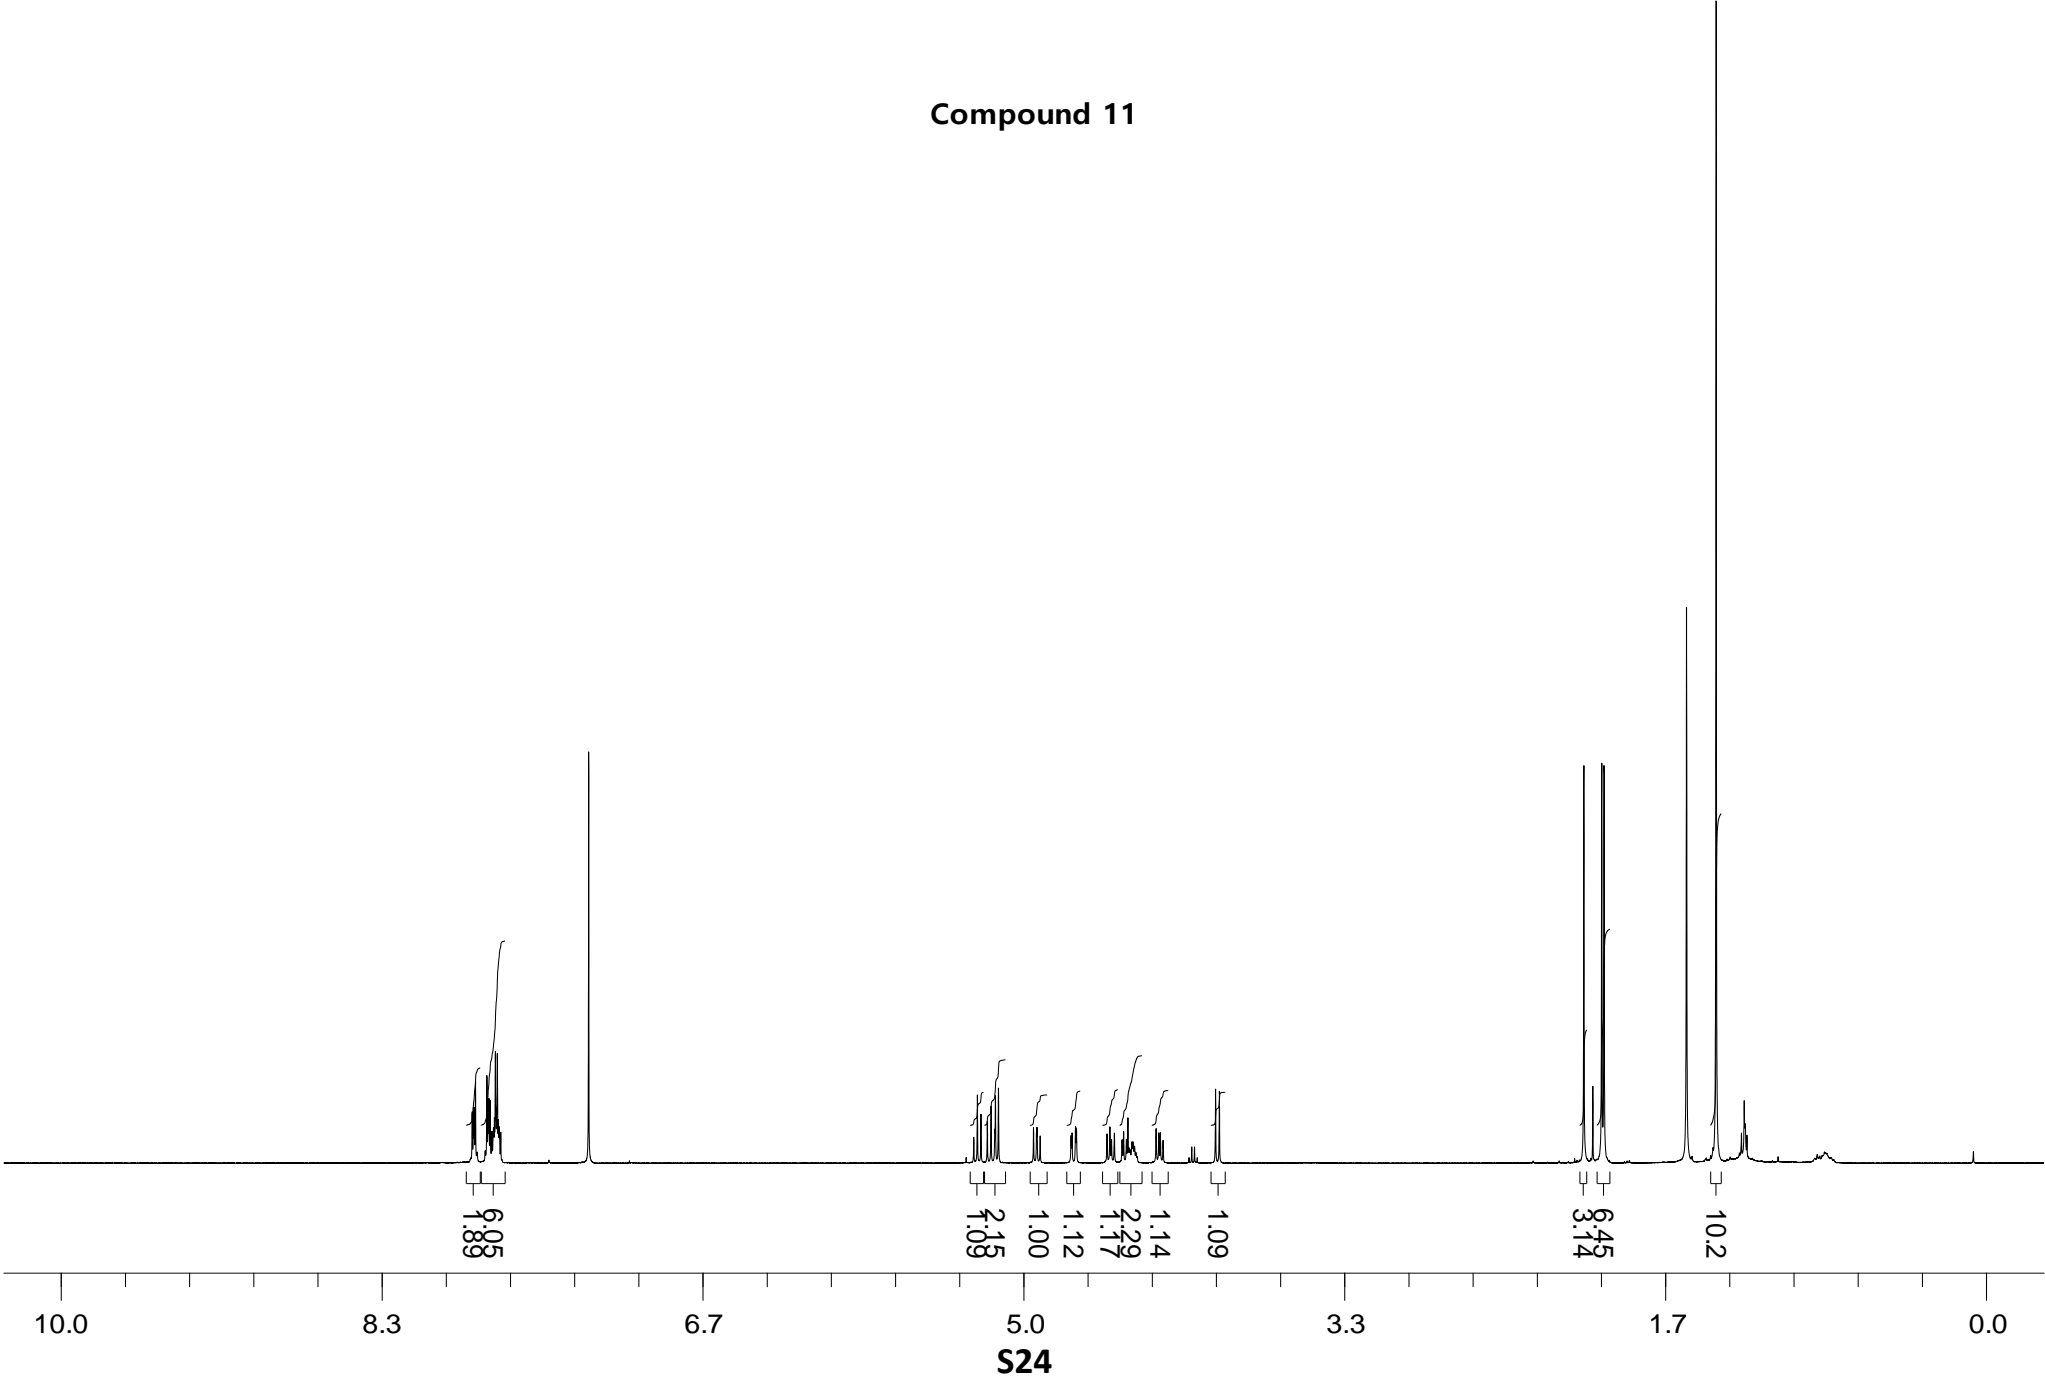

Compound 11

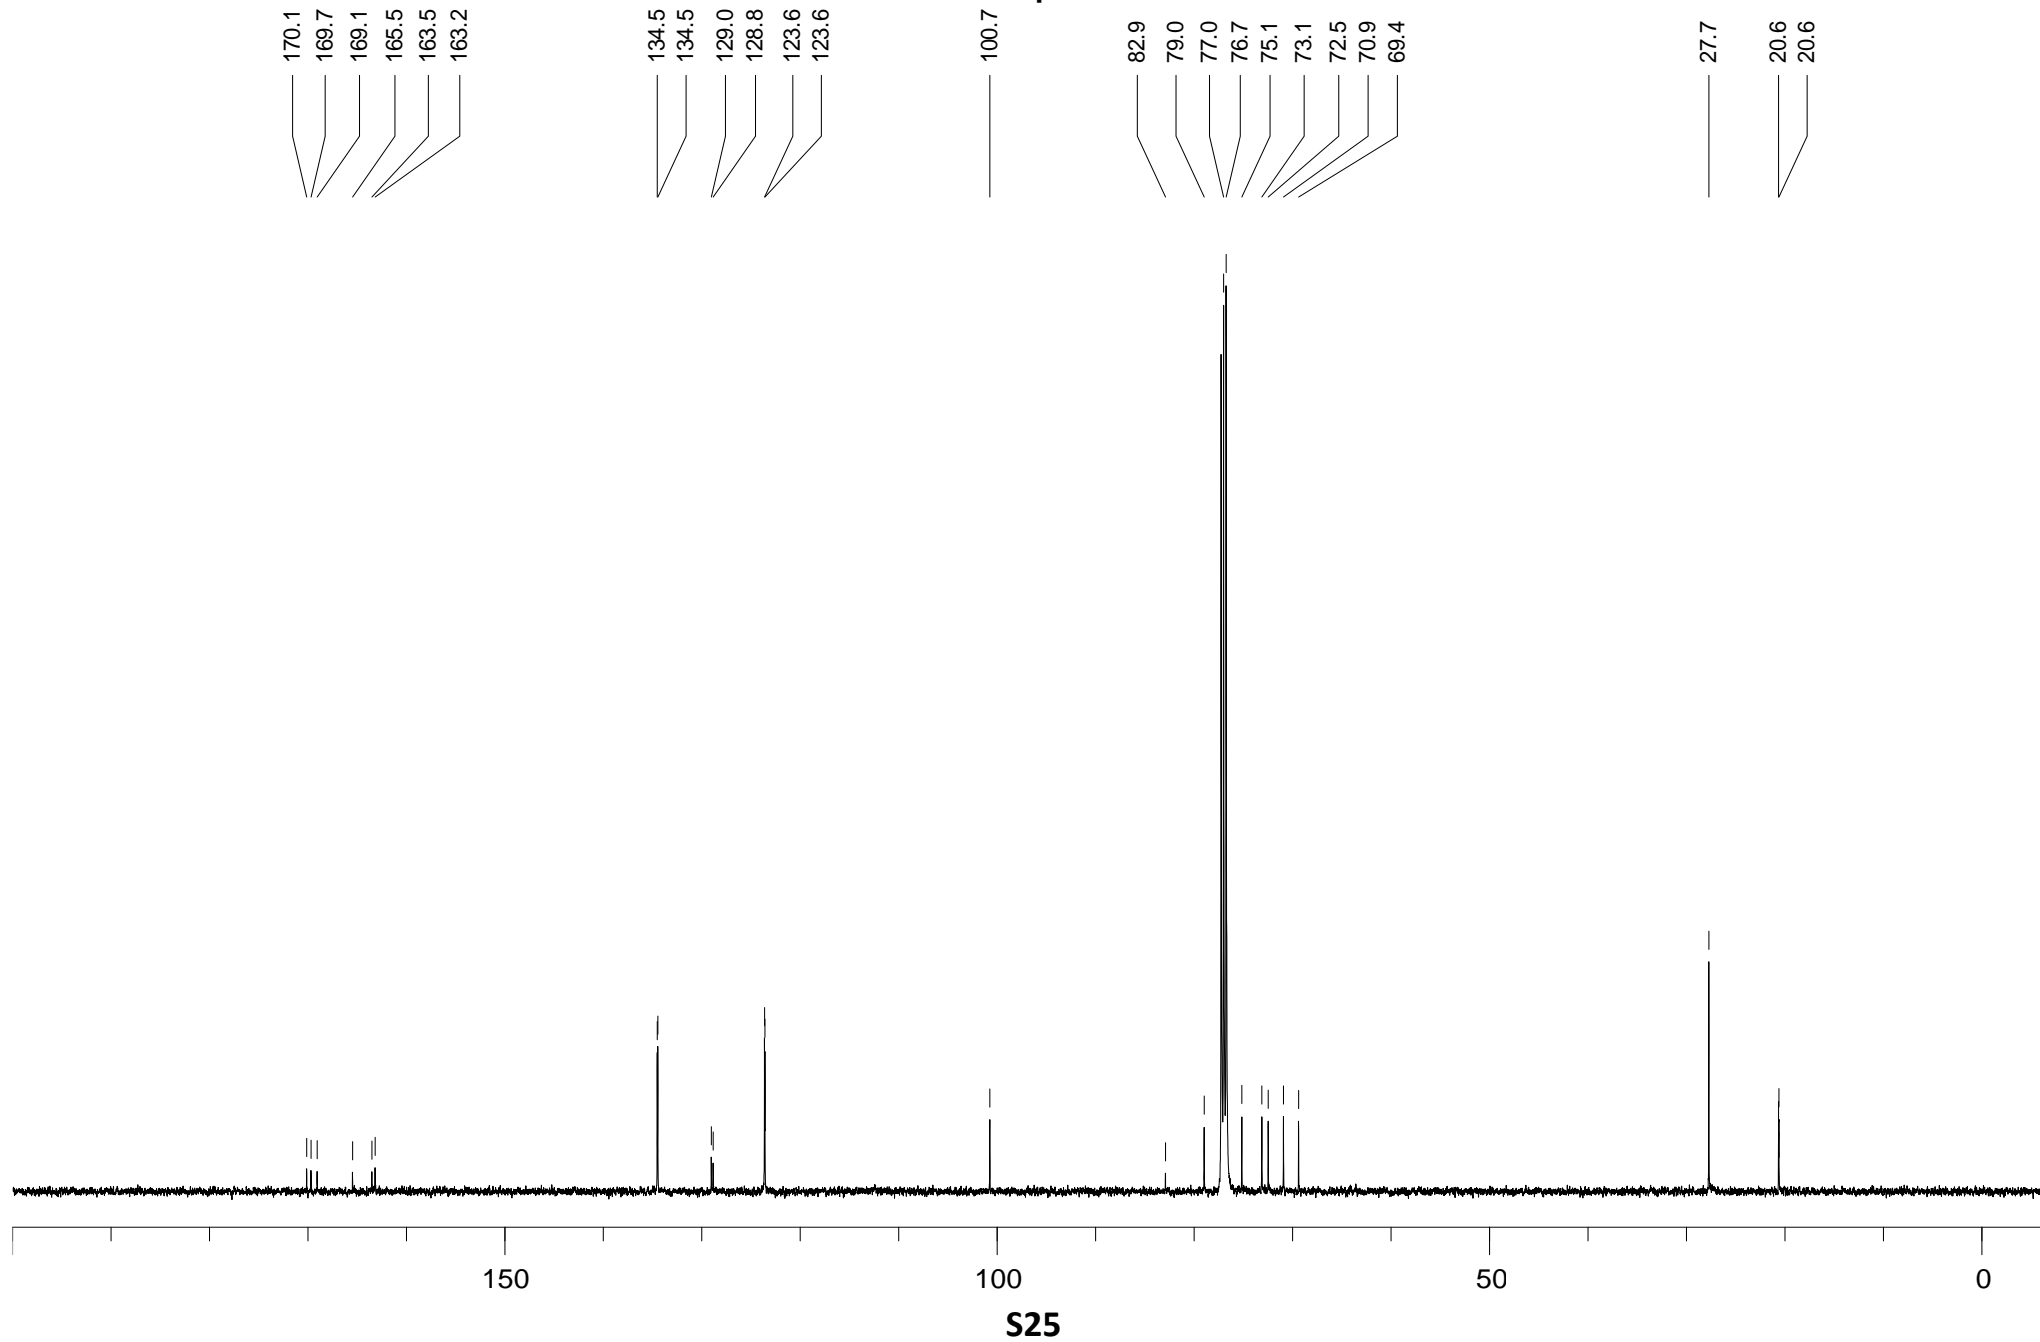

Compound 12

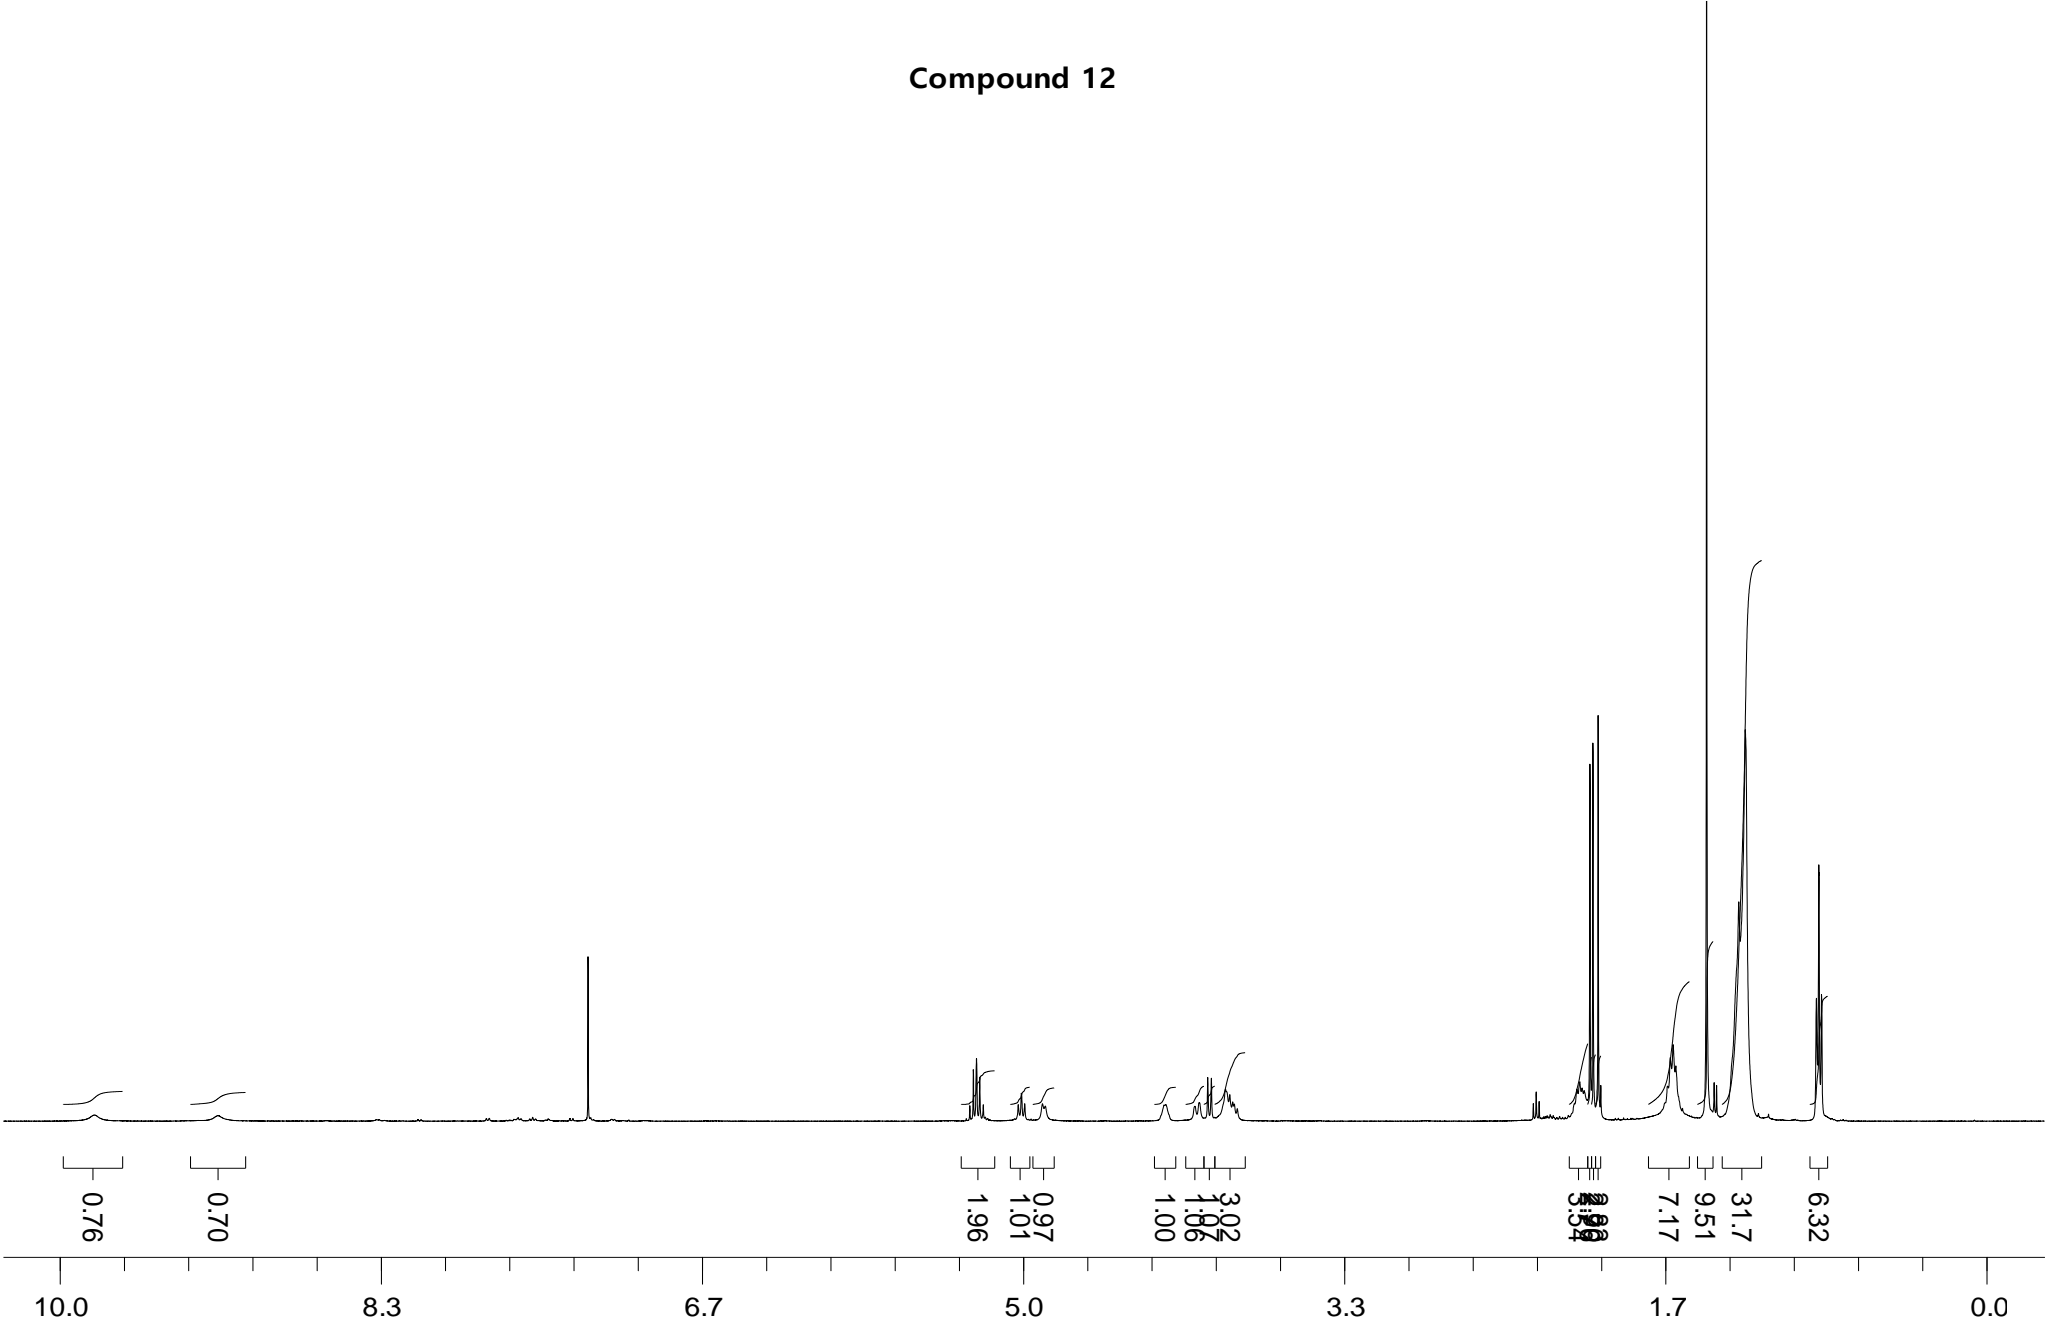

S26

Compound 12

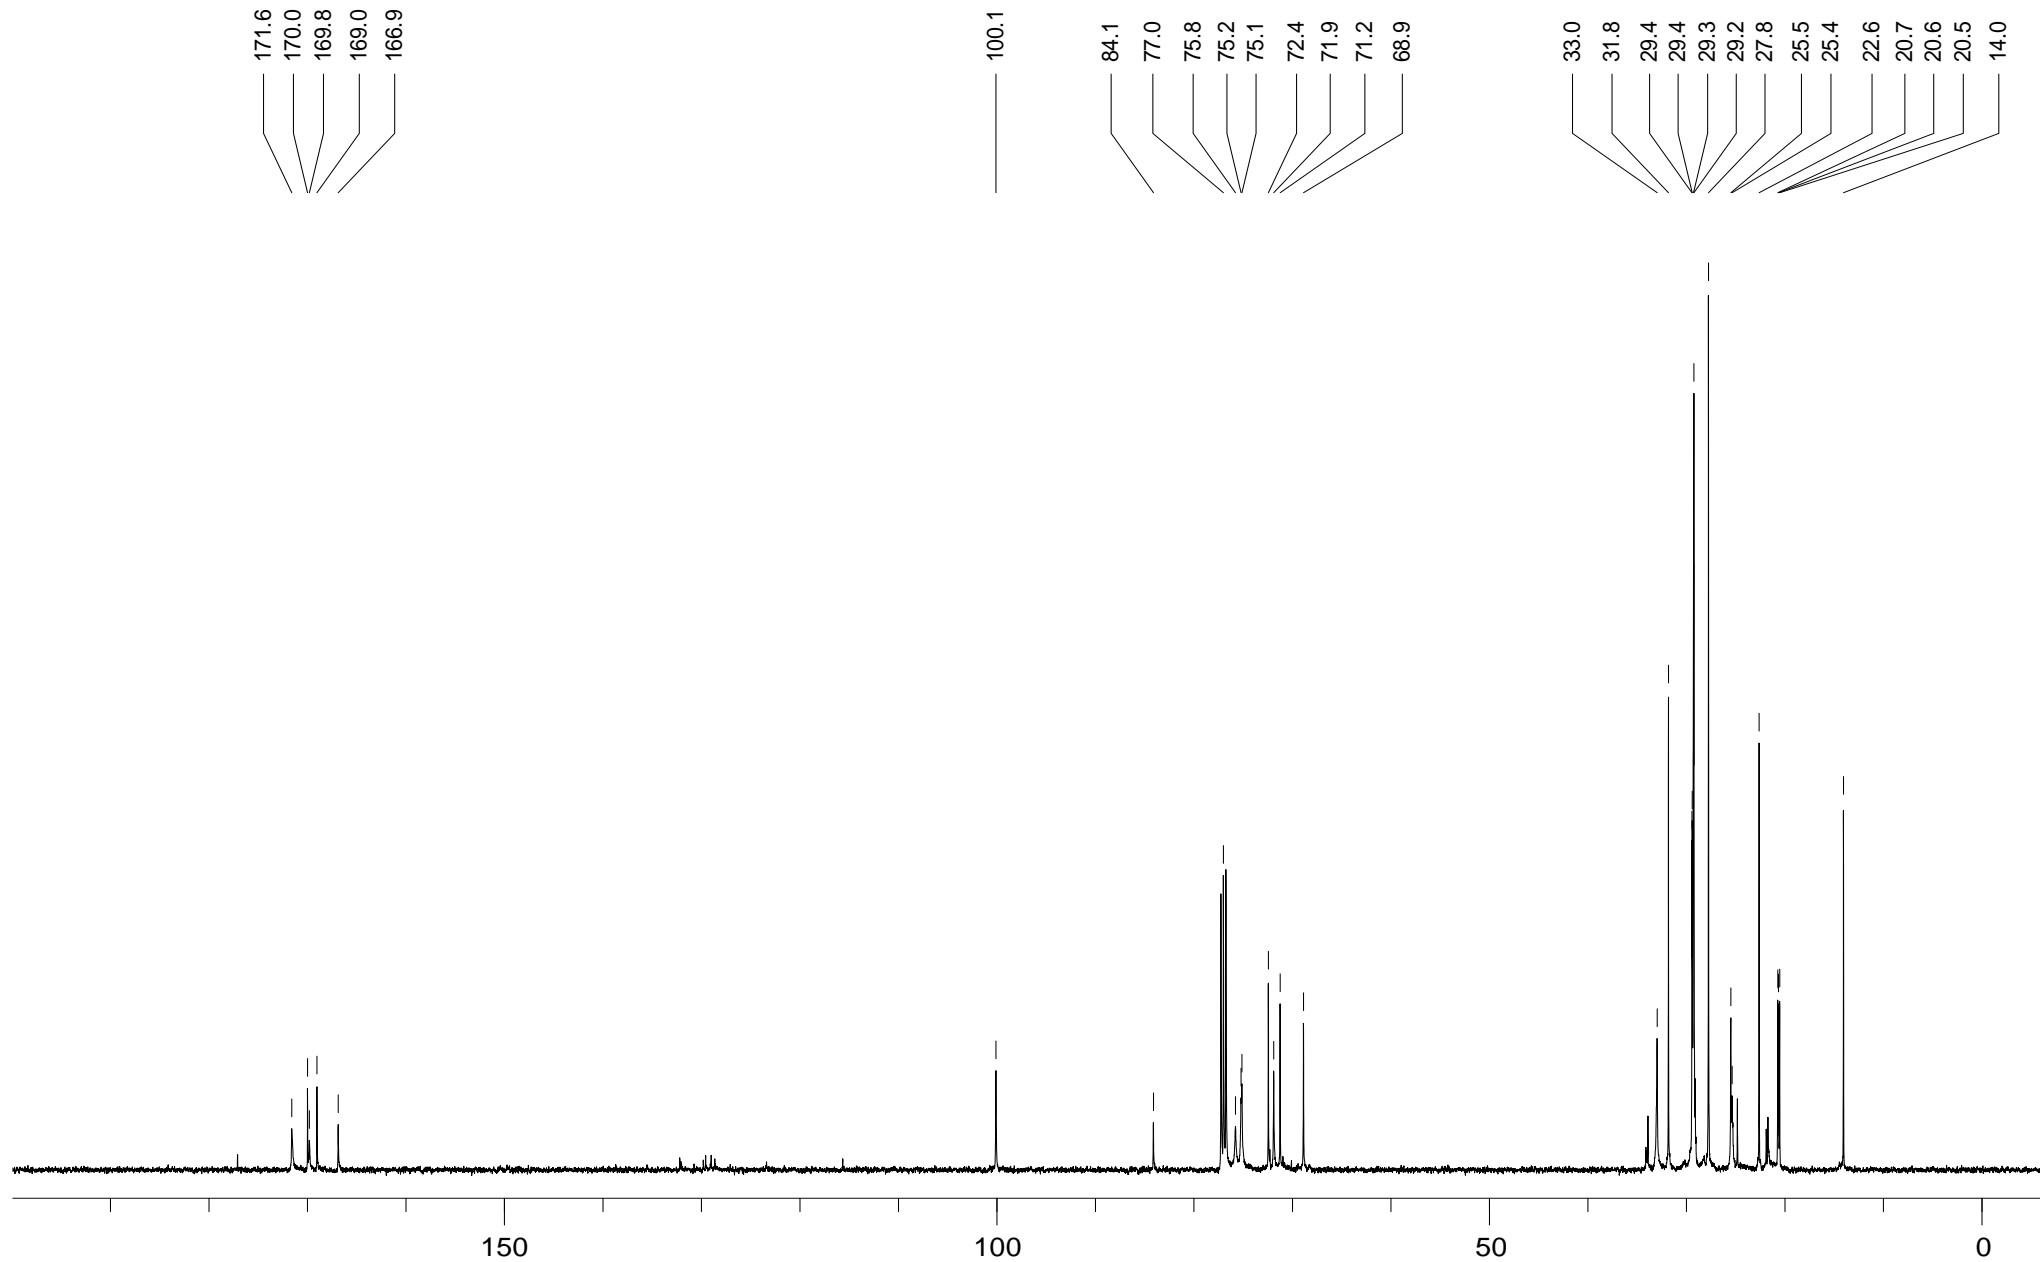

S27

Compound 13

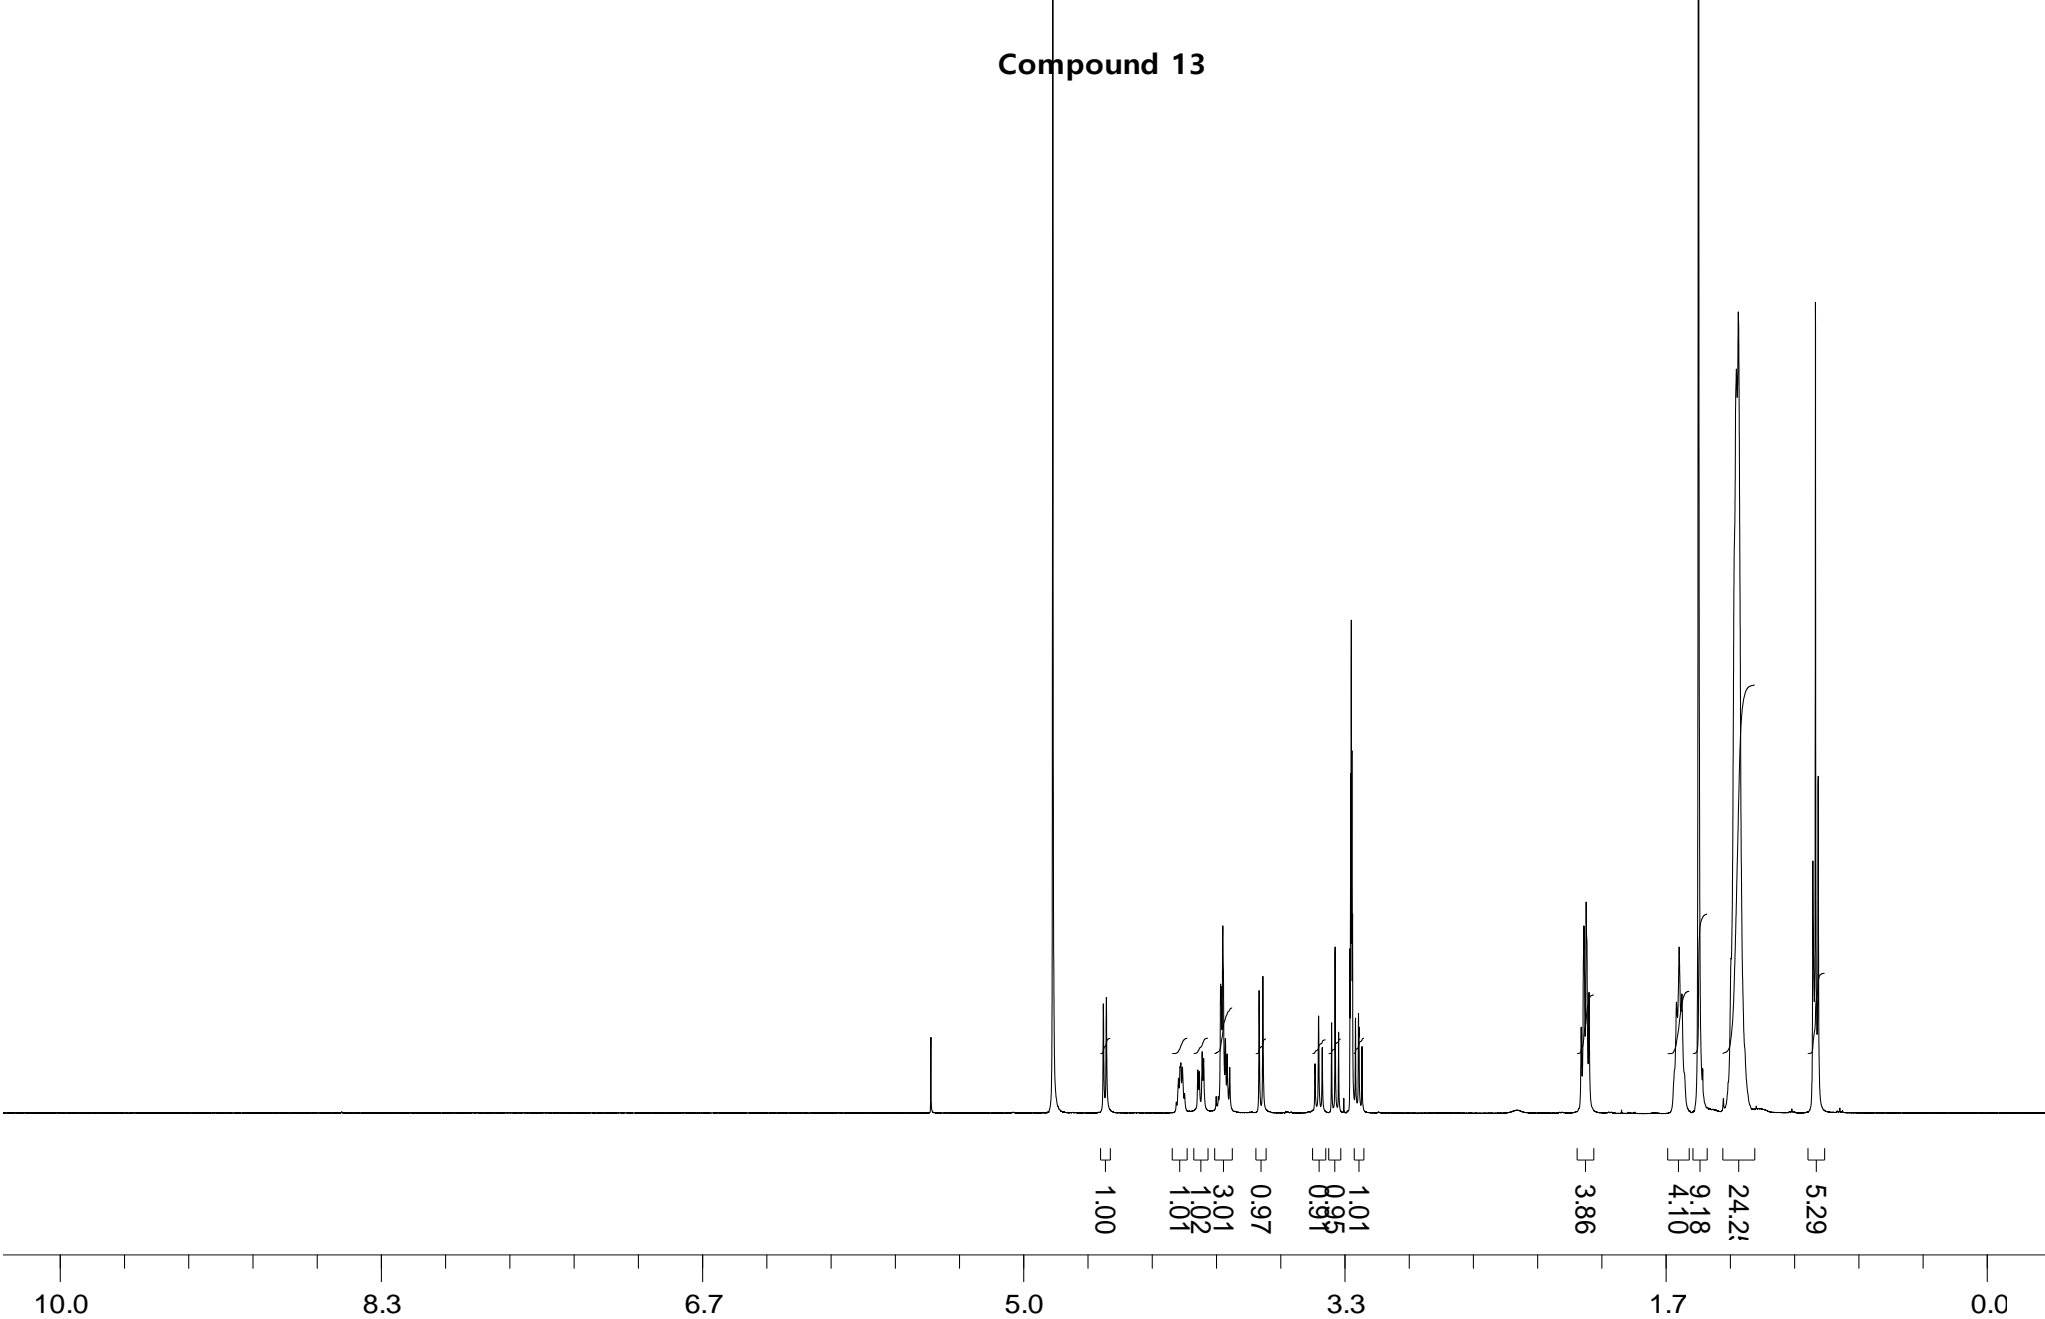

S28

Compound 13

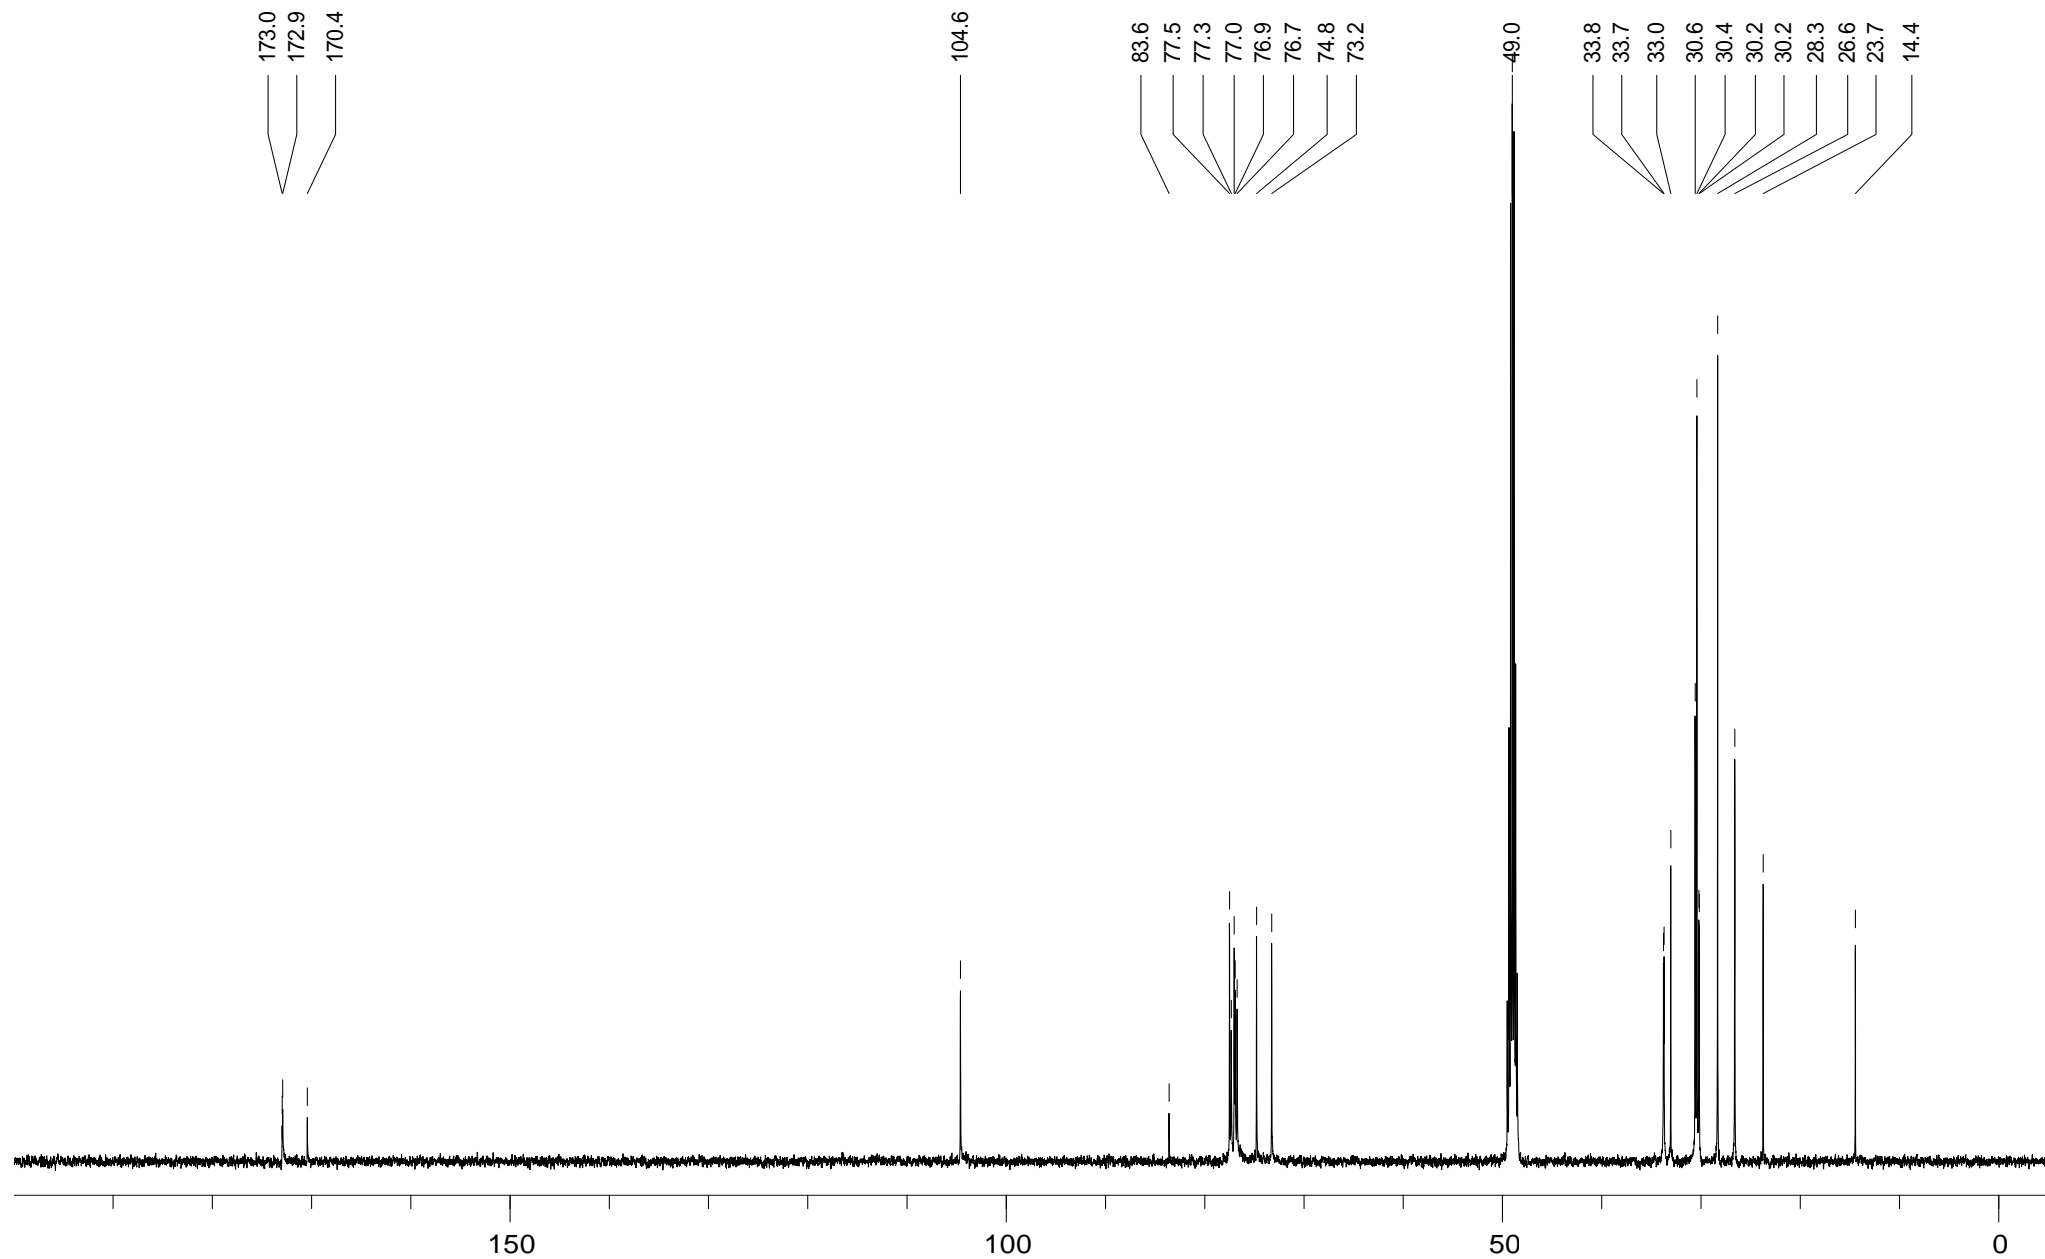

S29

Compound 15

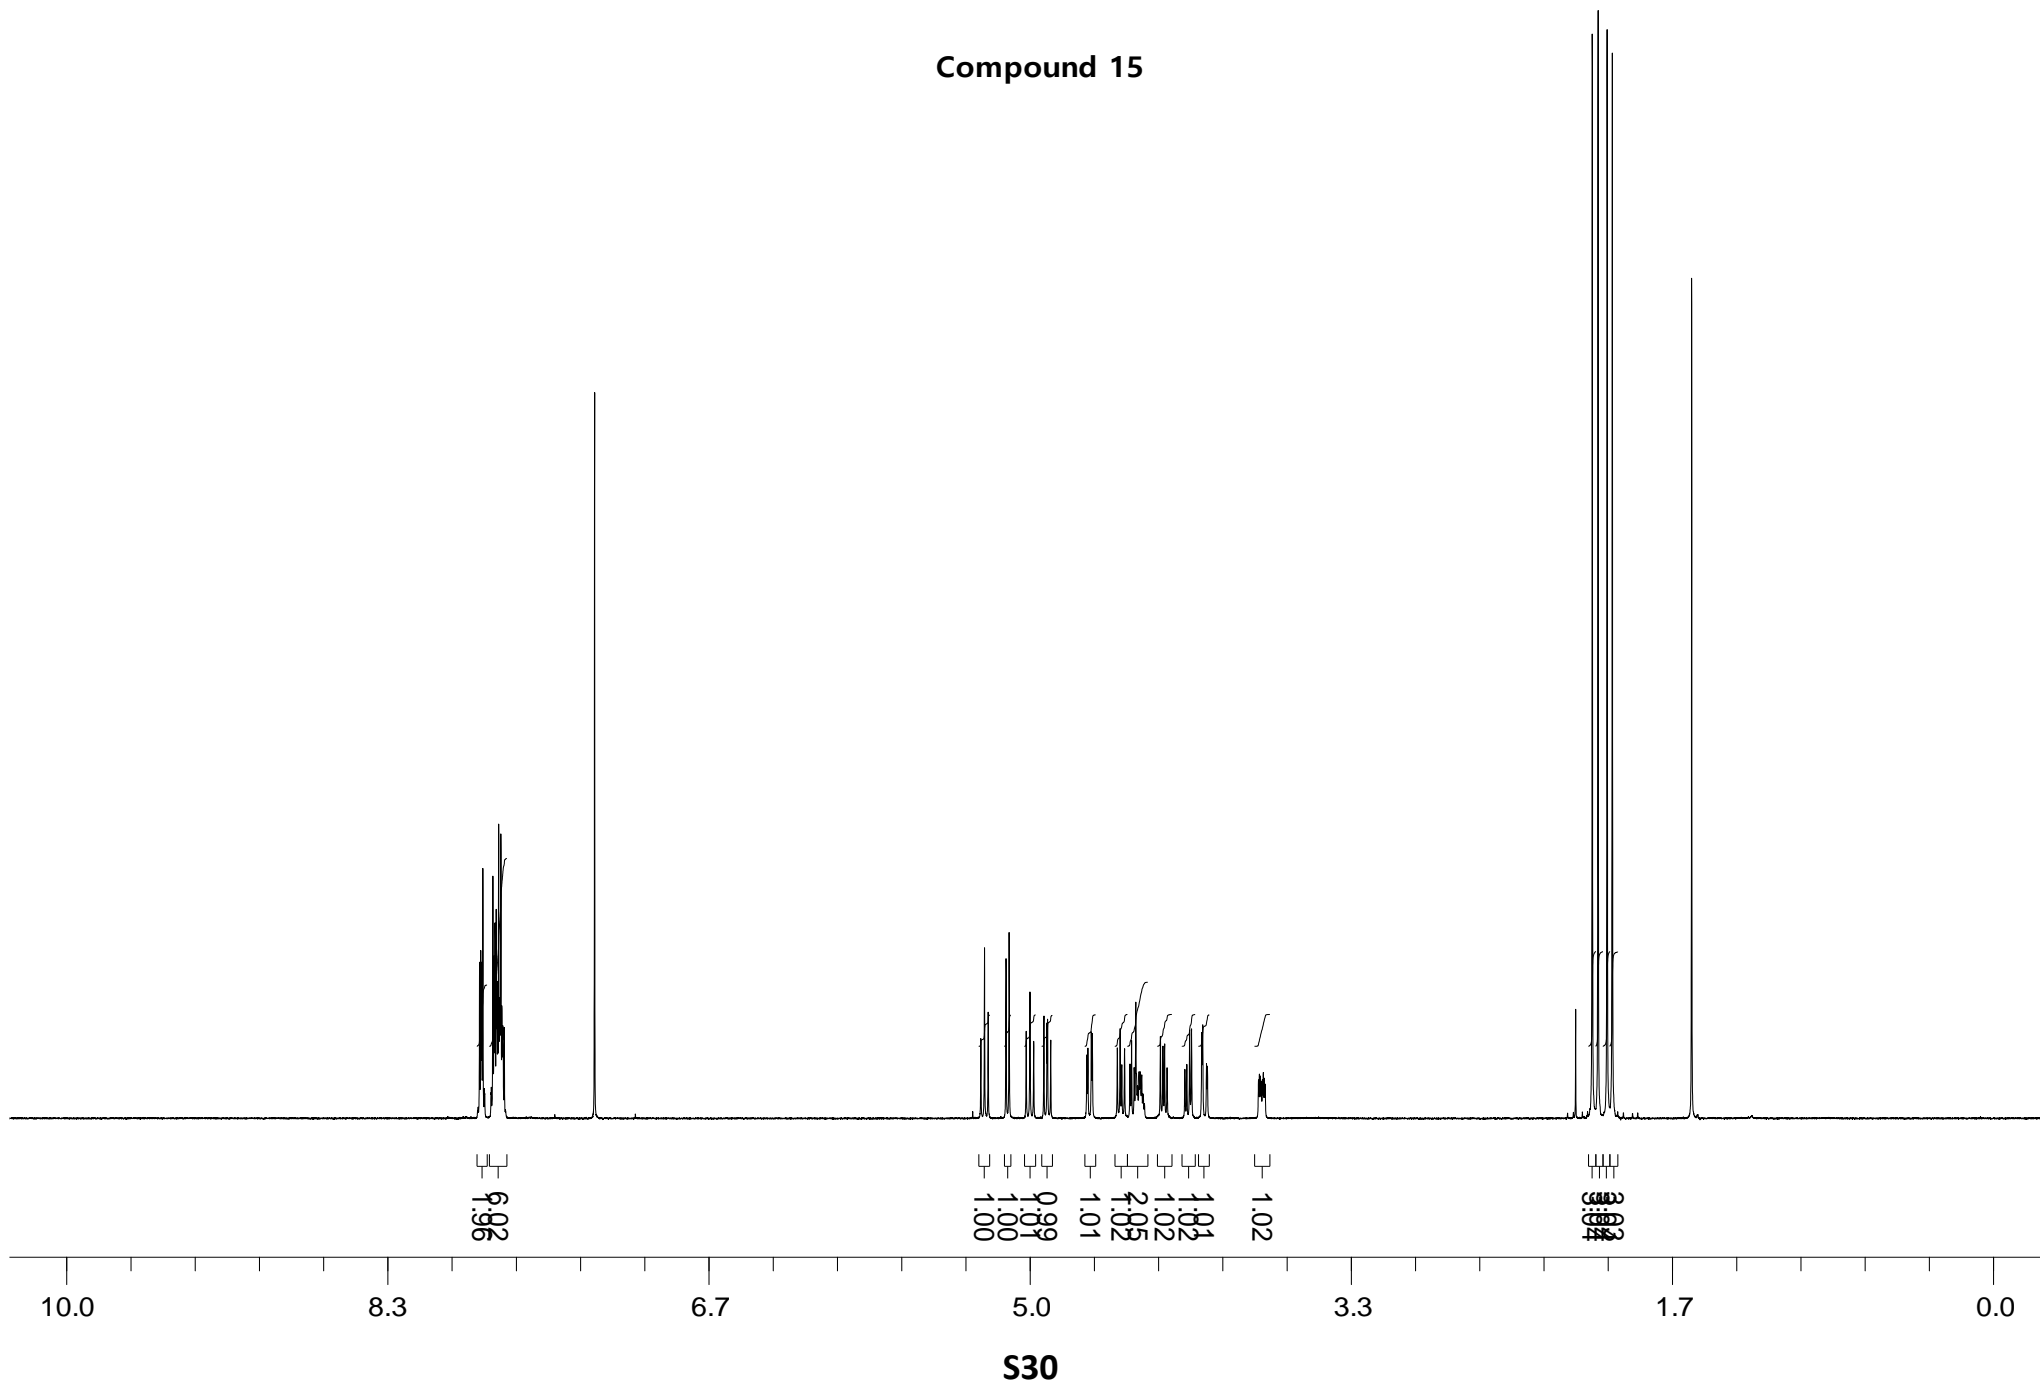

Compound 15

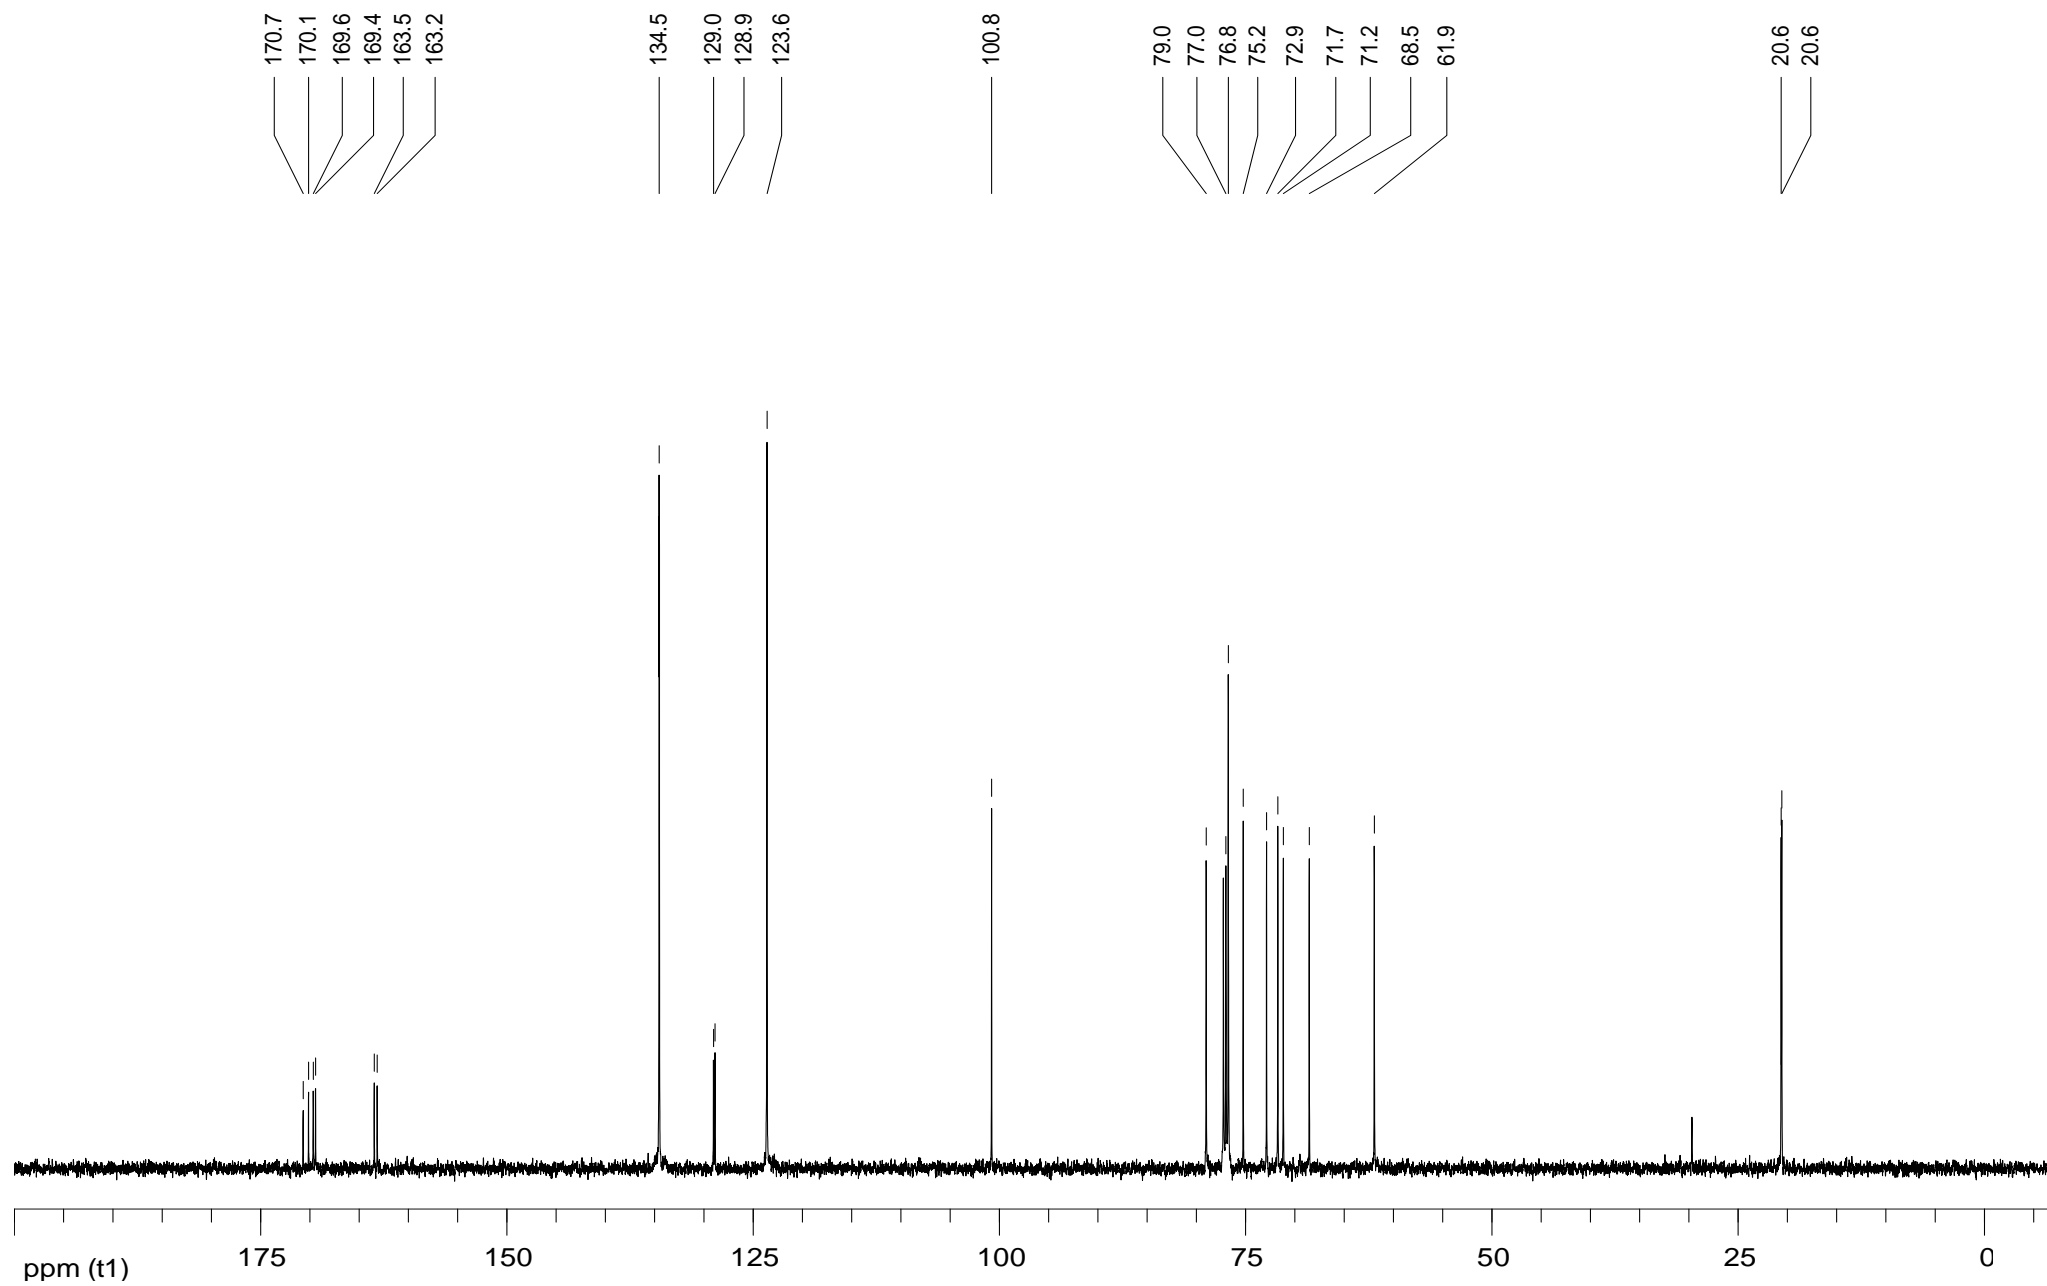

S31



Compound 16

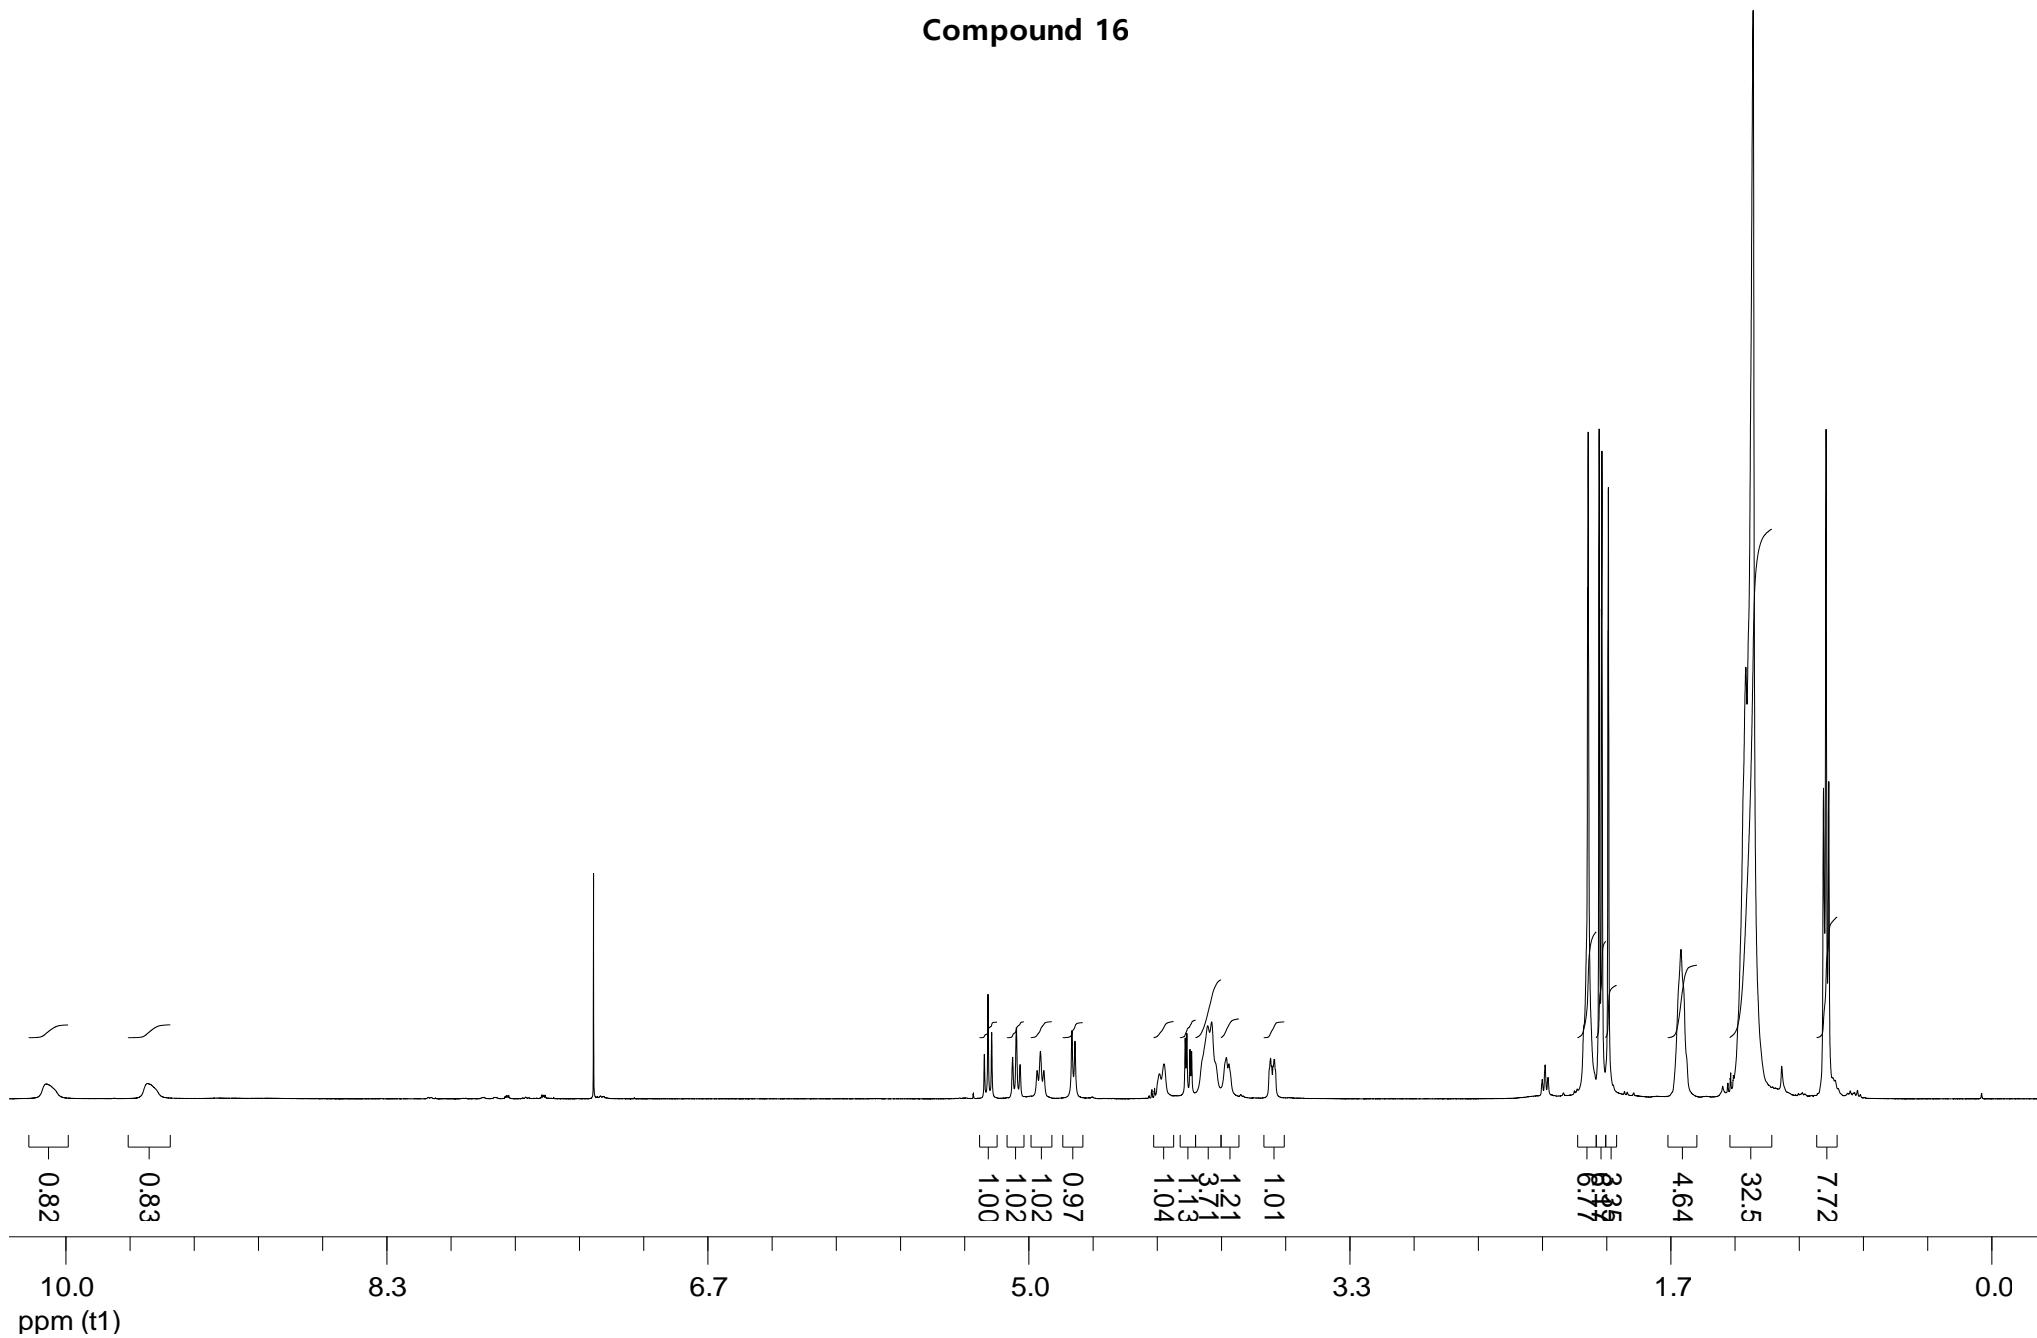

S32

Compound 16

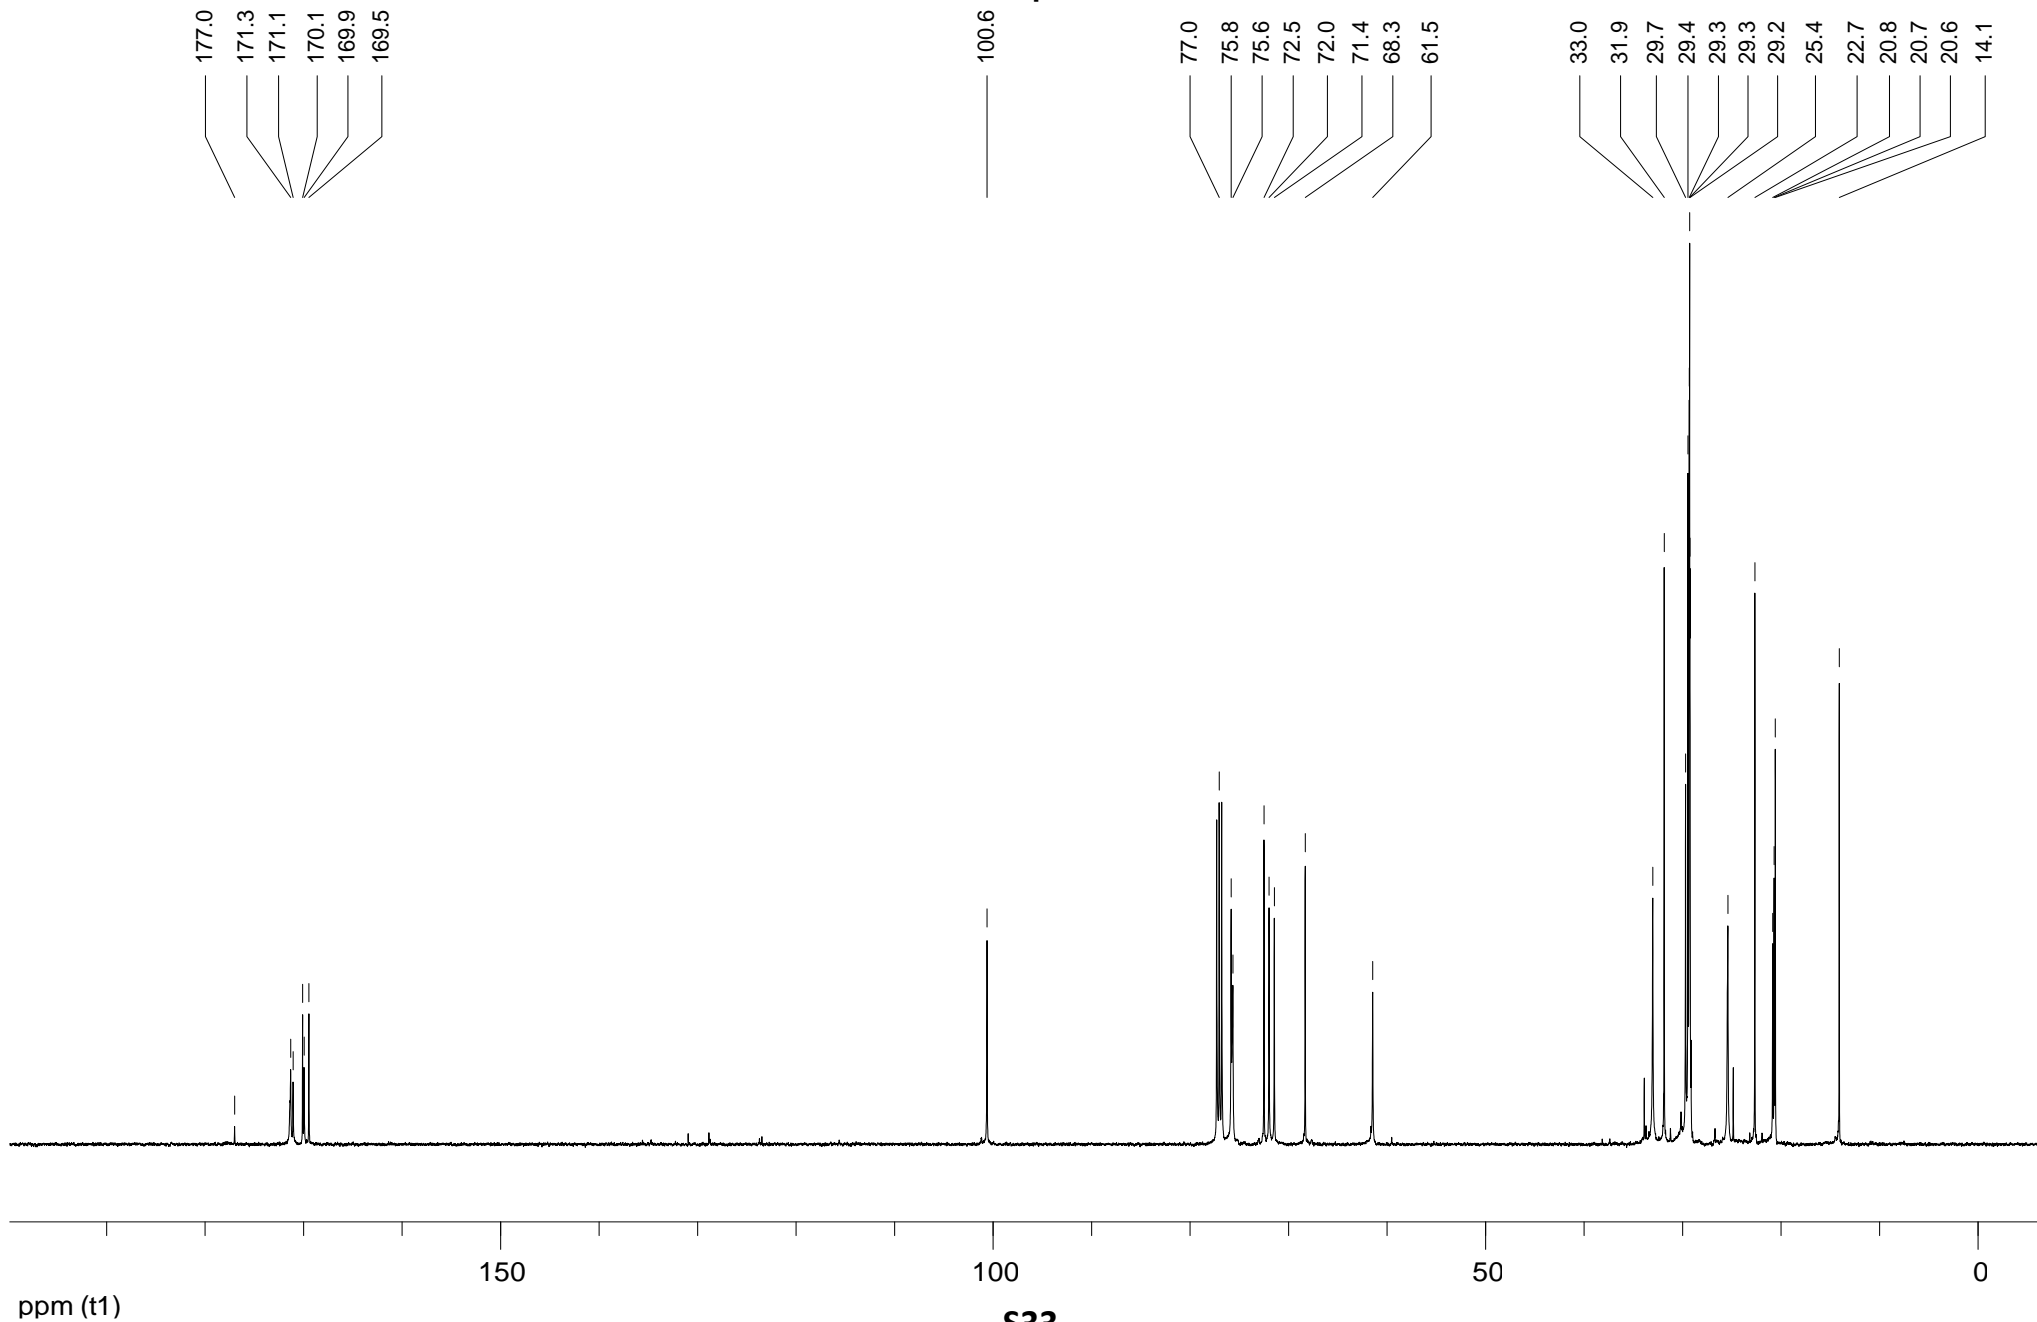

S33

Compound 17a

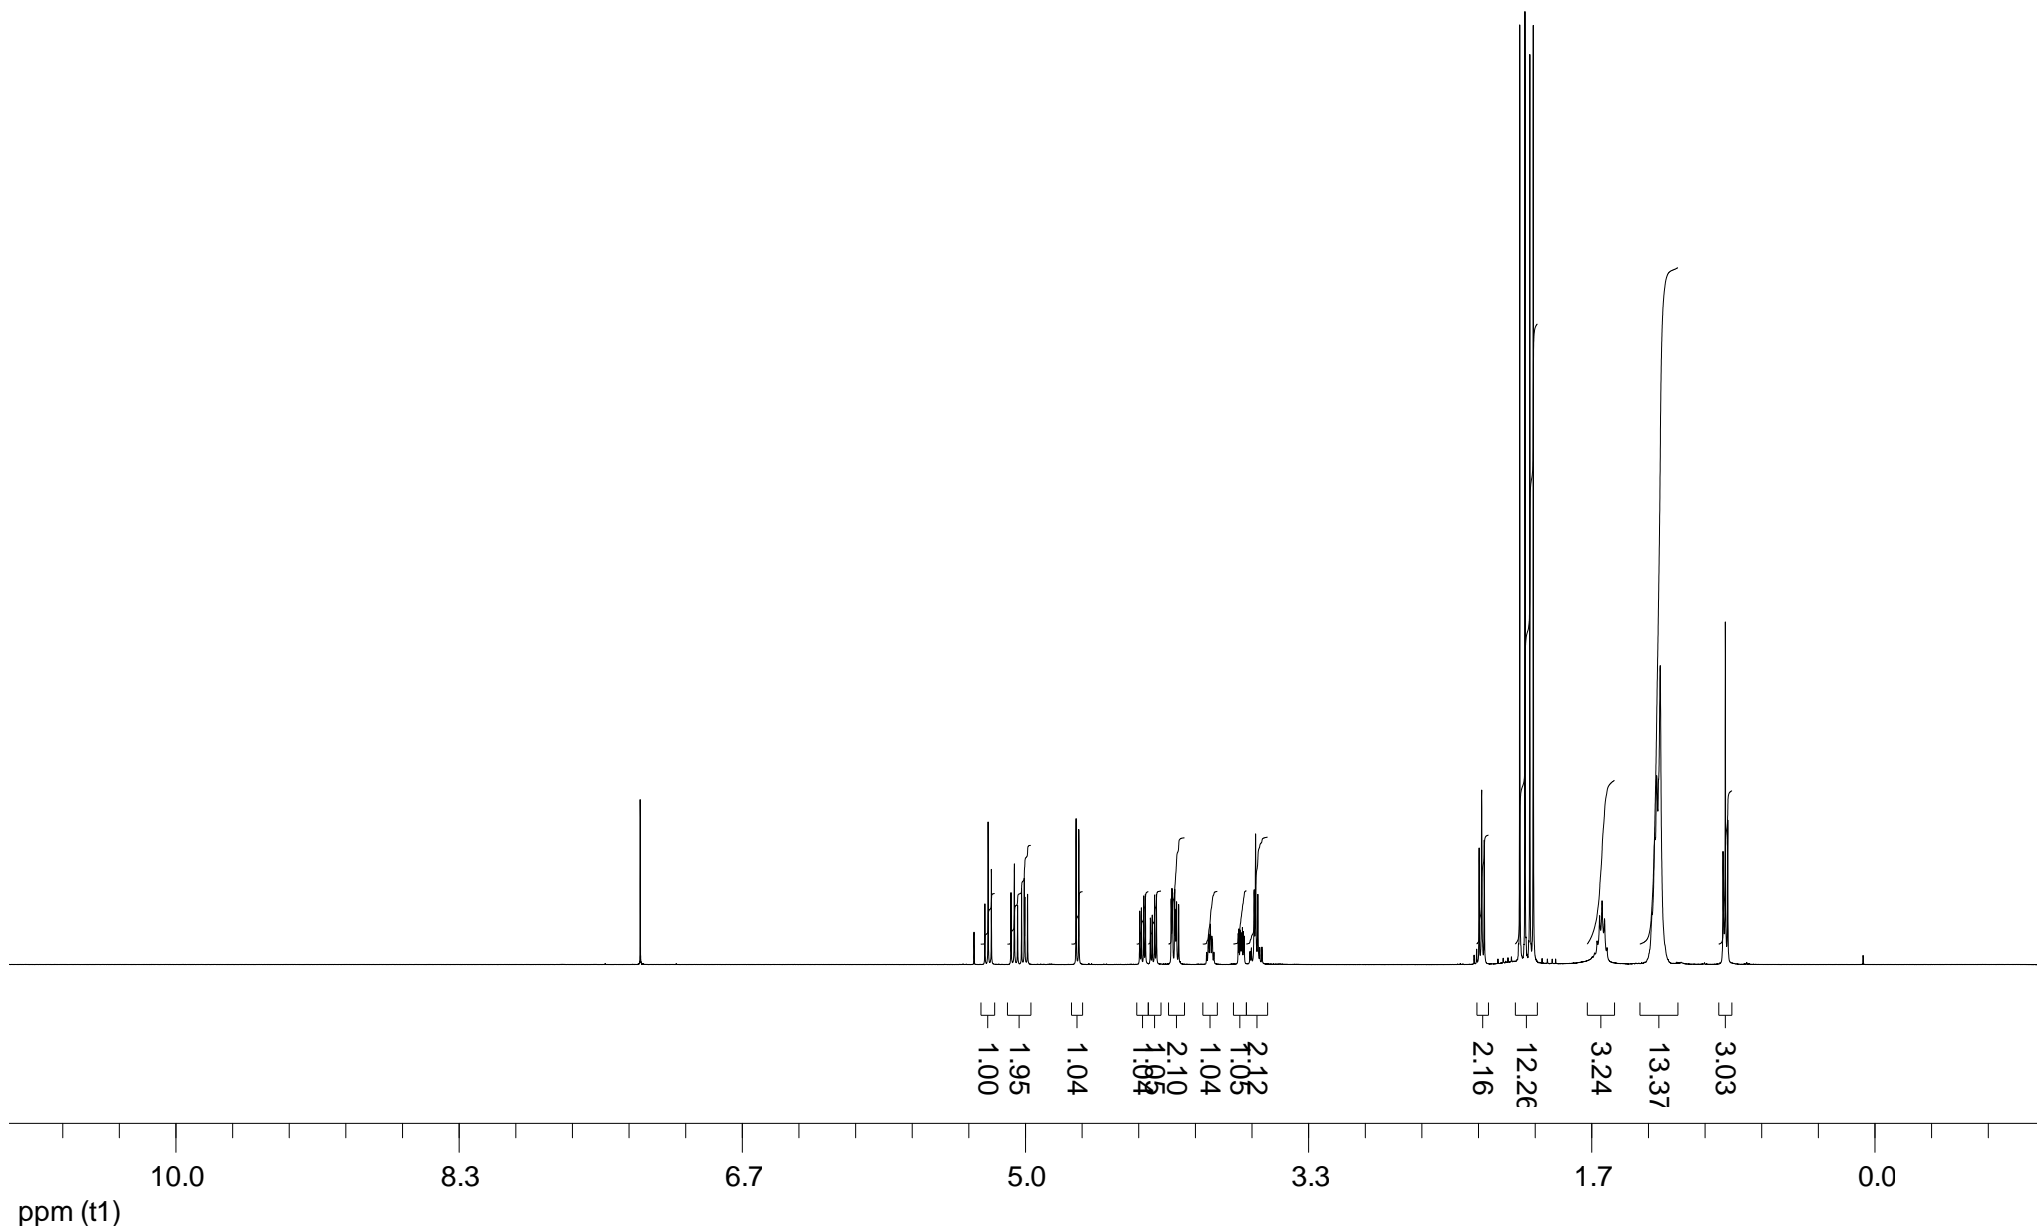

S34

Compound 17a

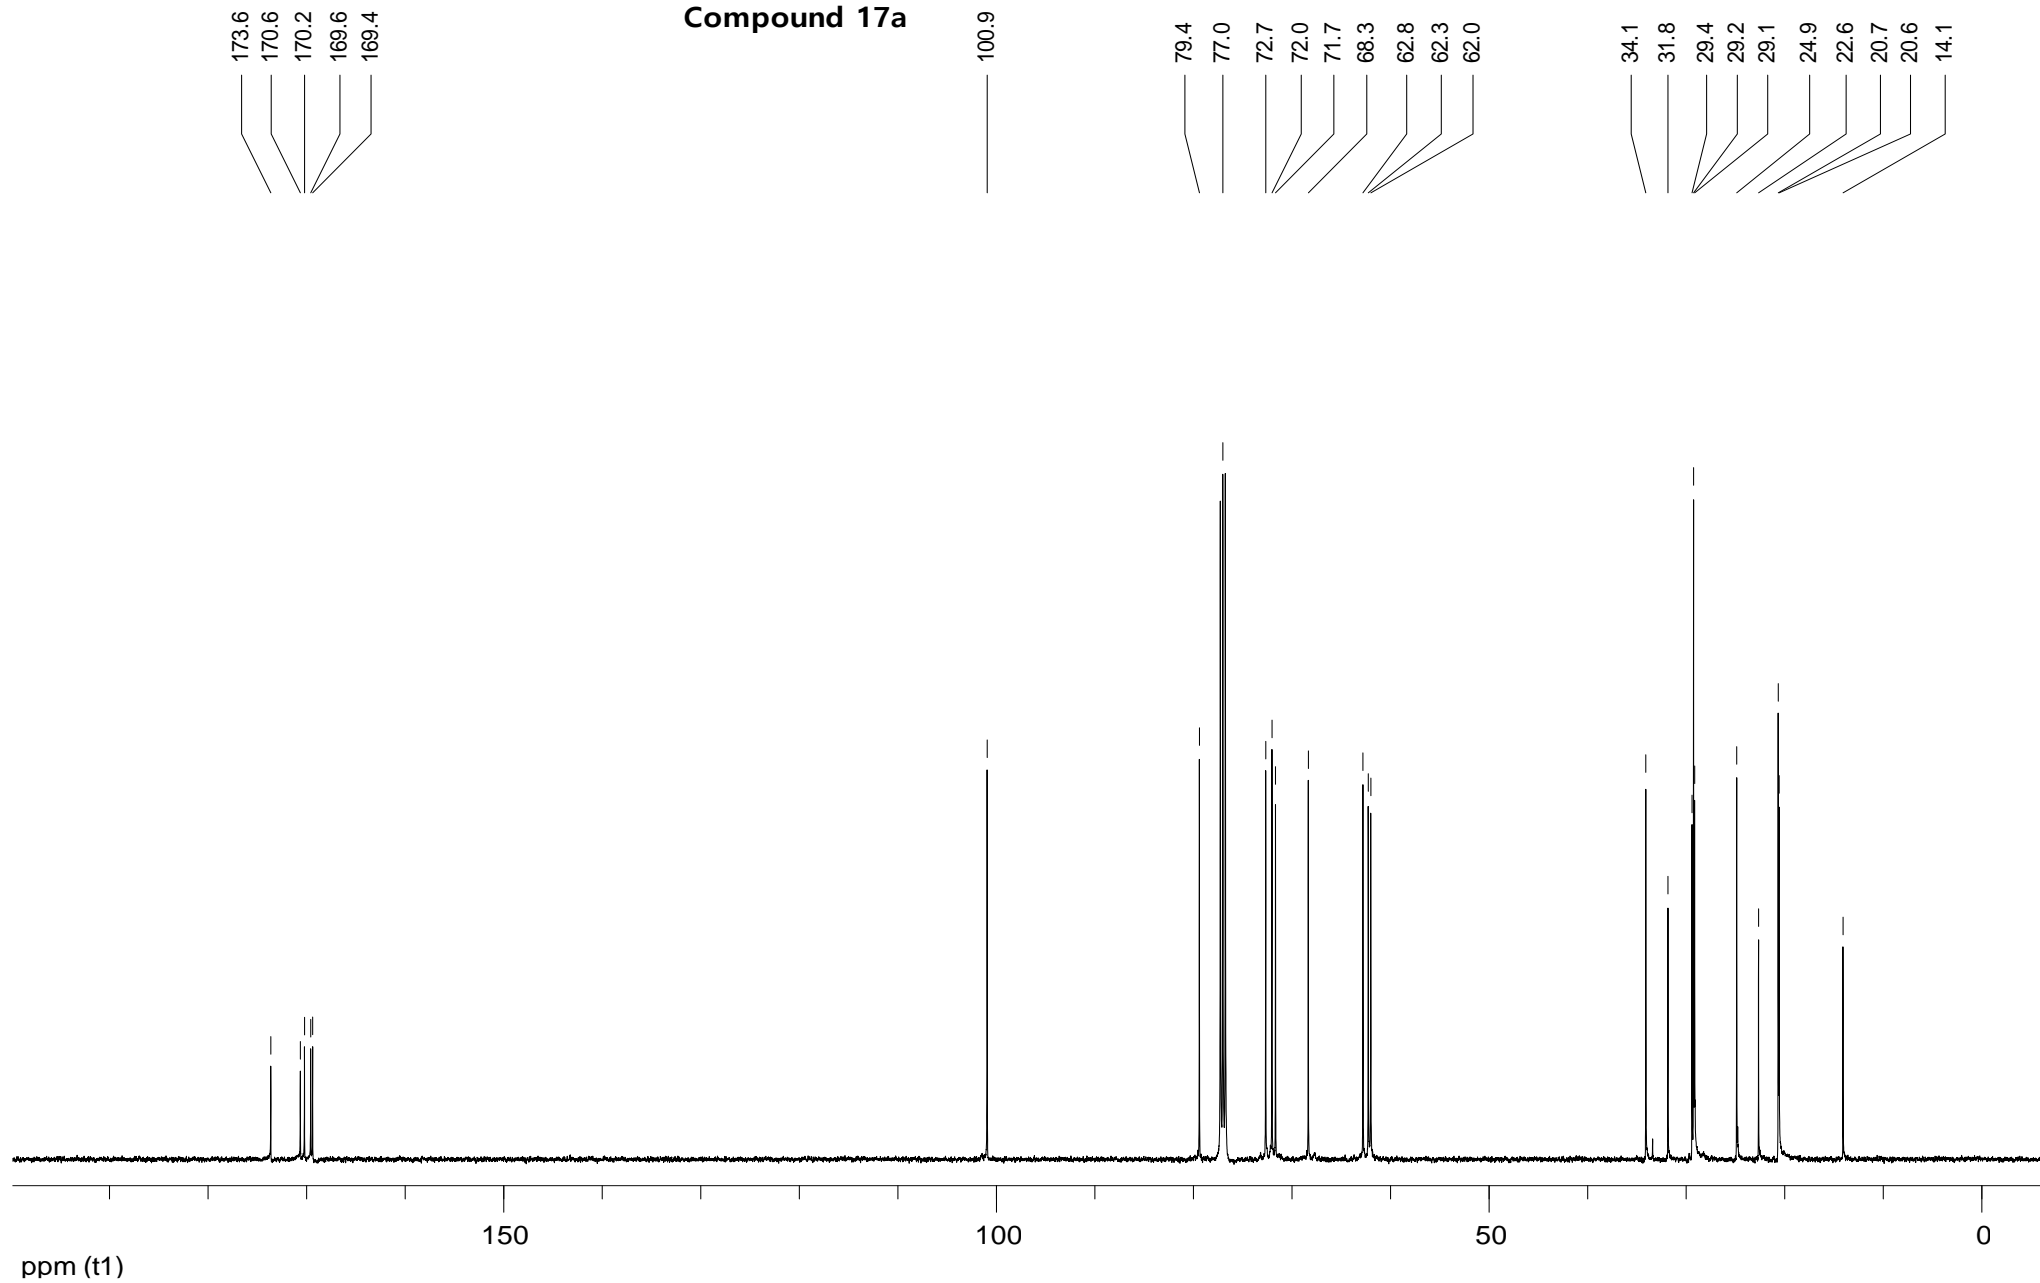

Compound 17b

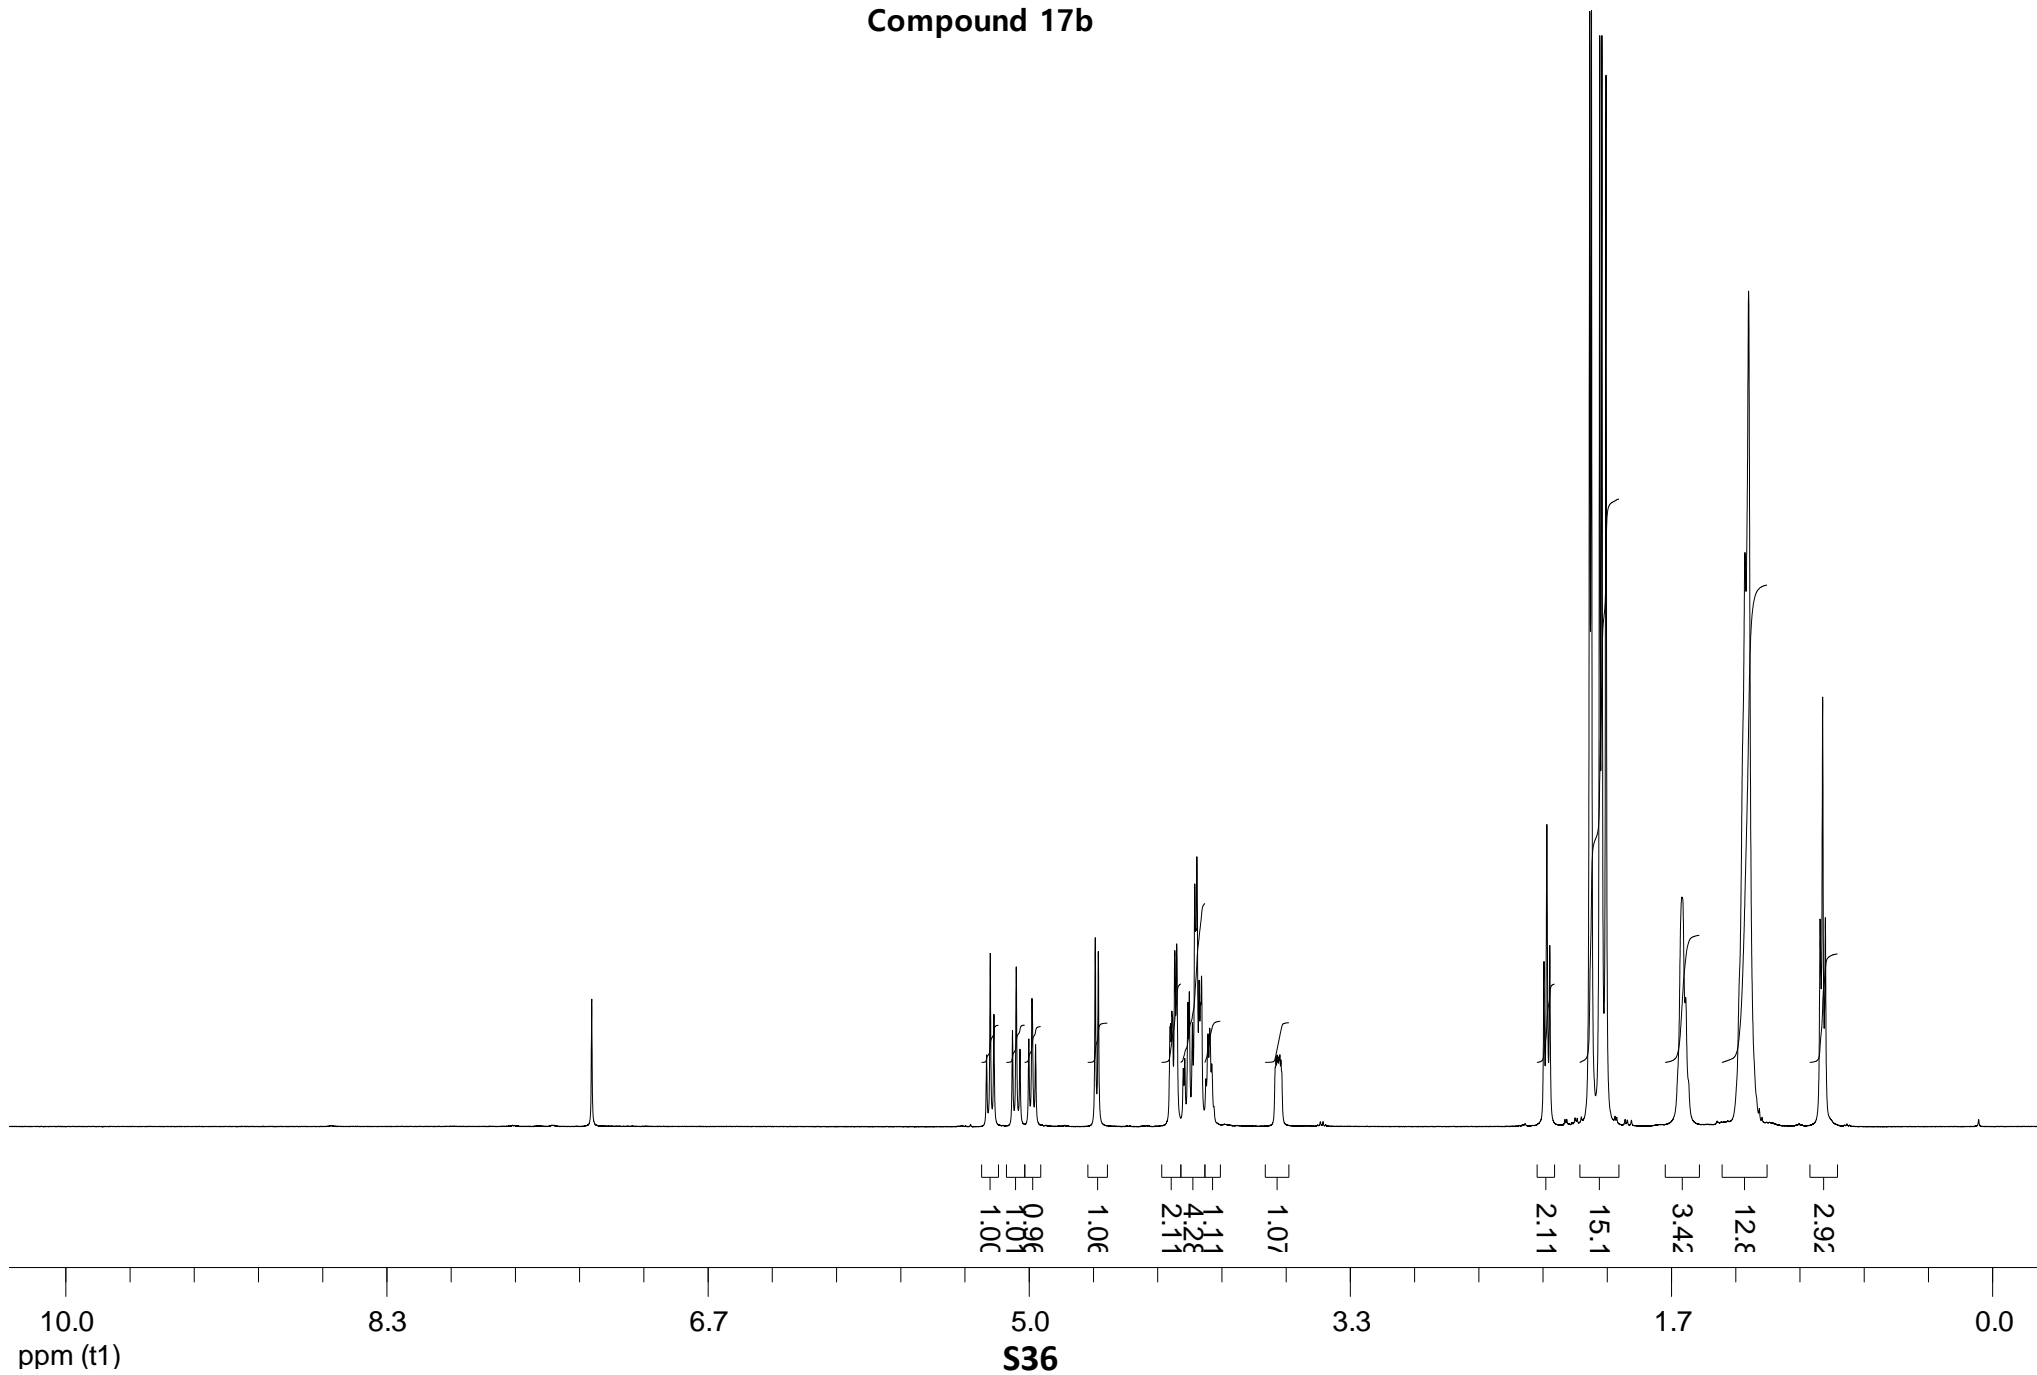

**Compound 17b**

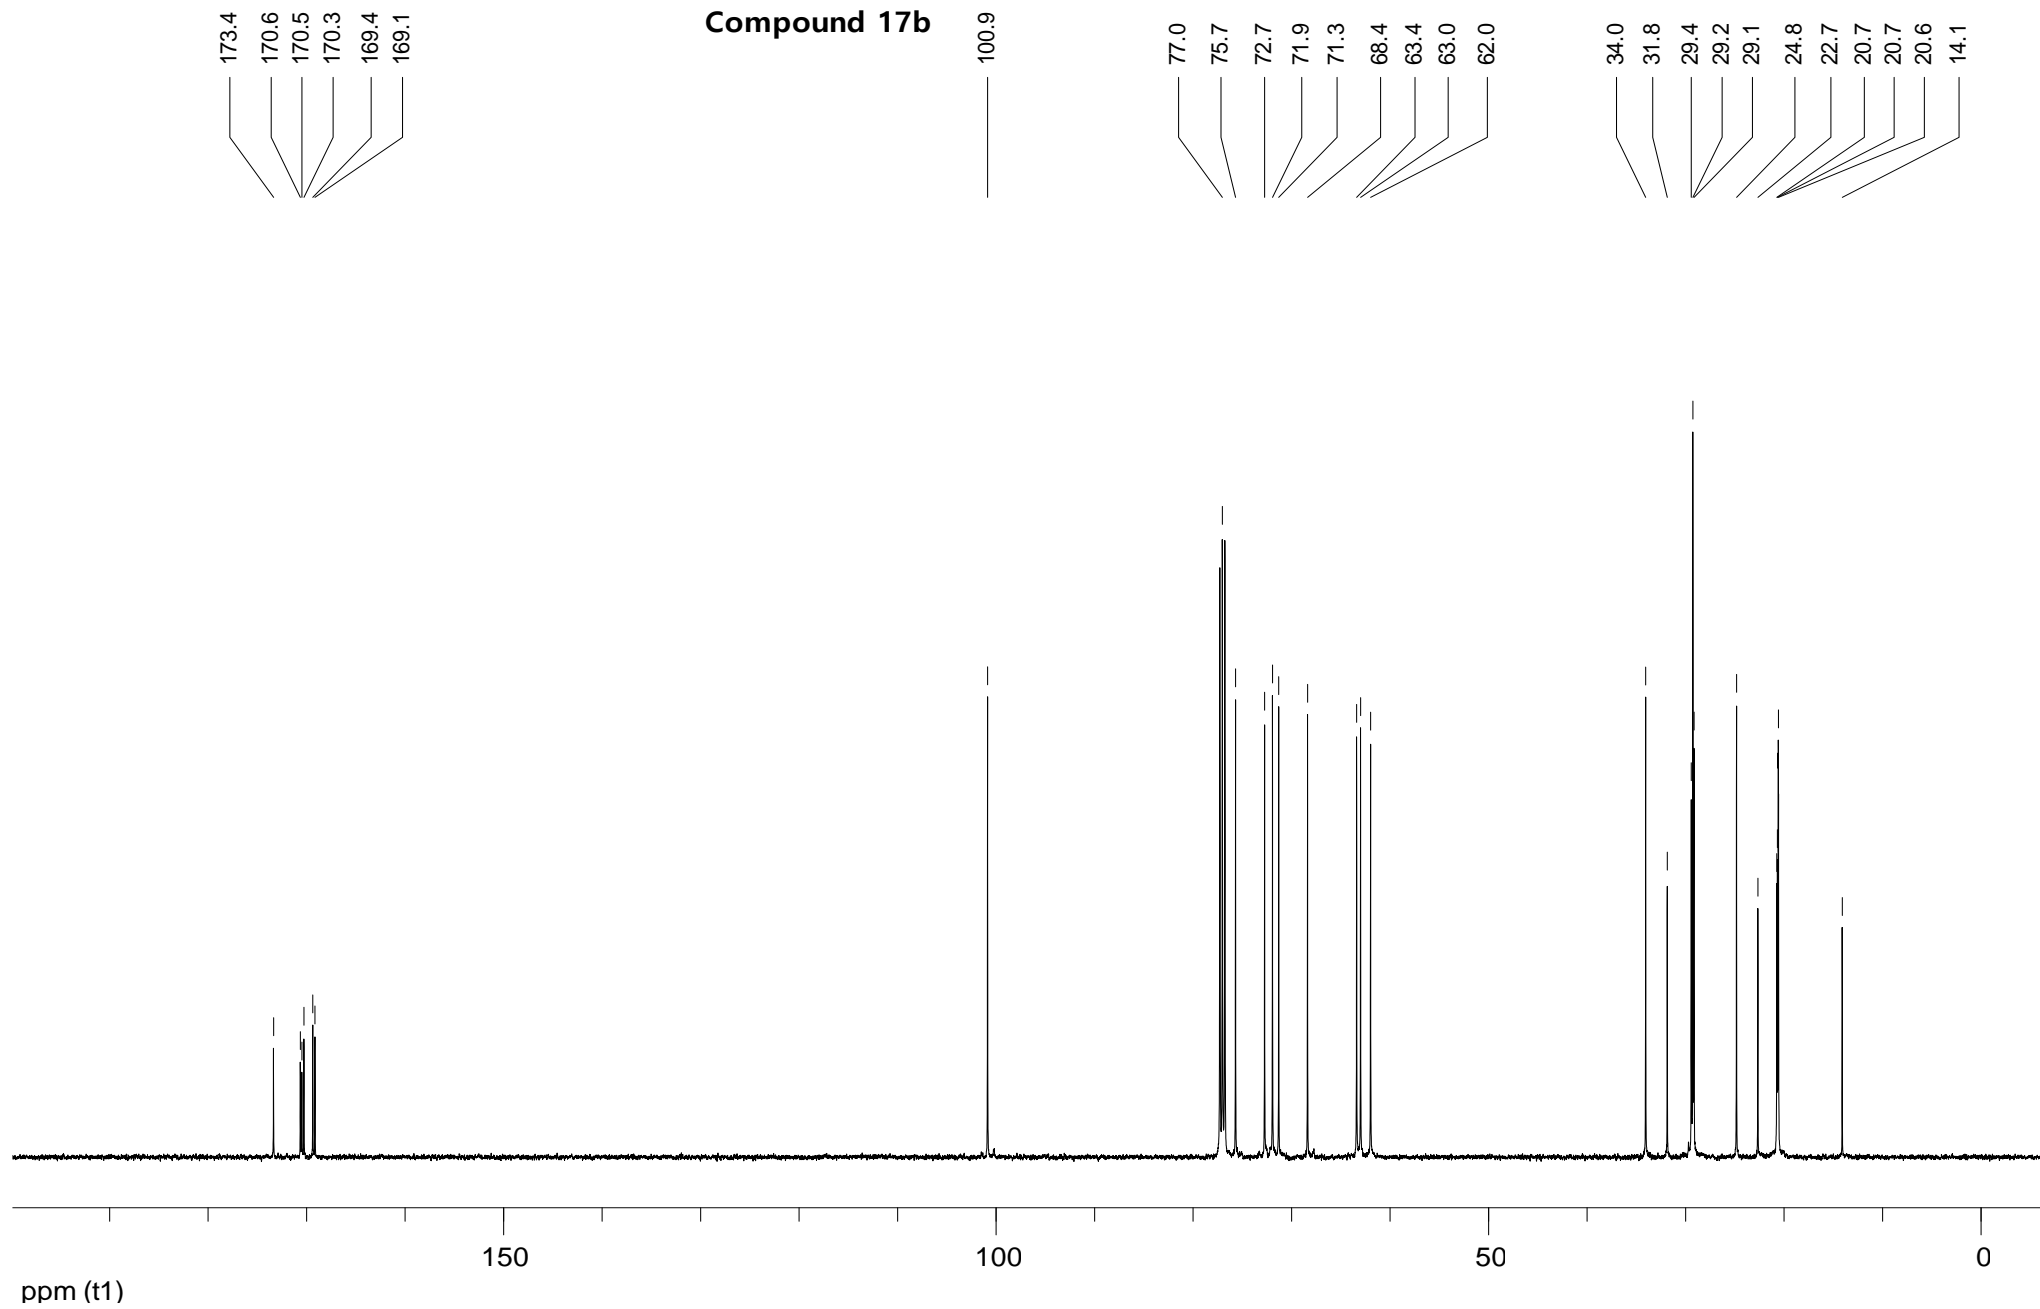

Compound 18

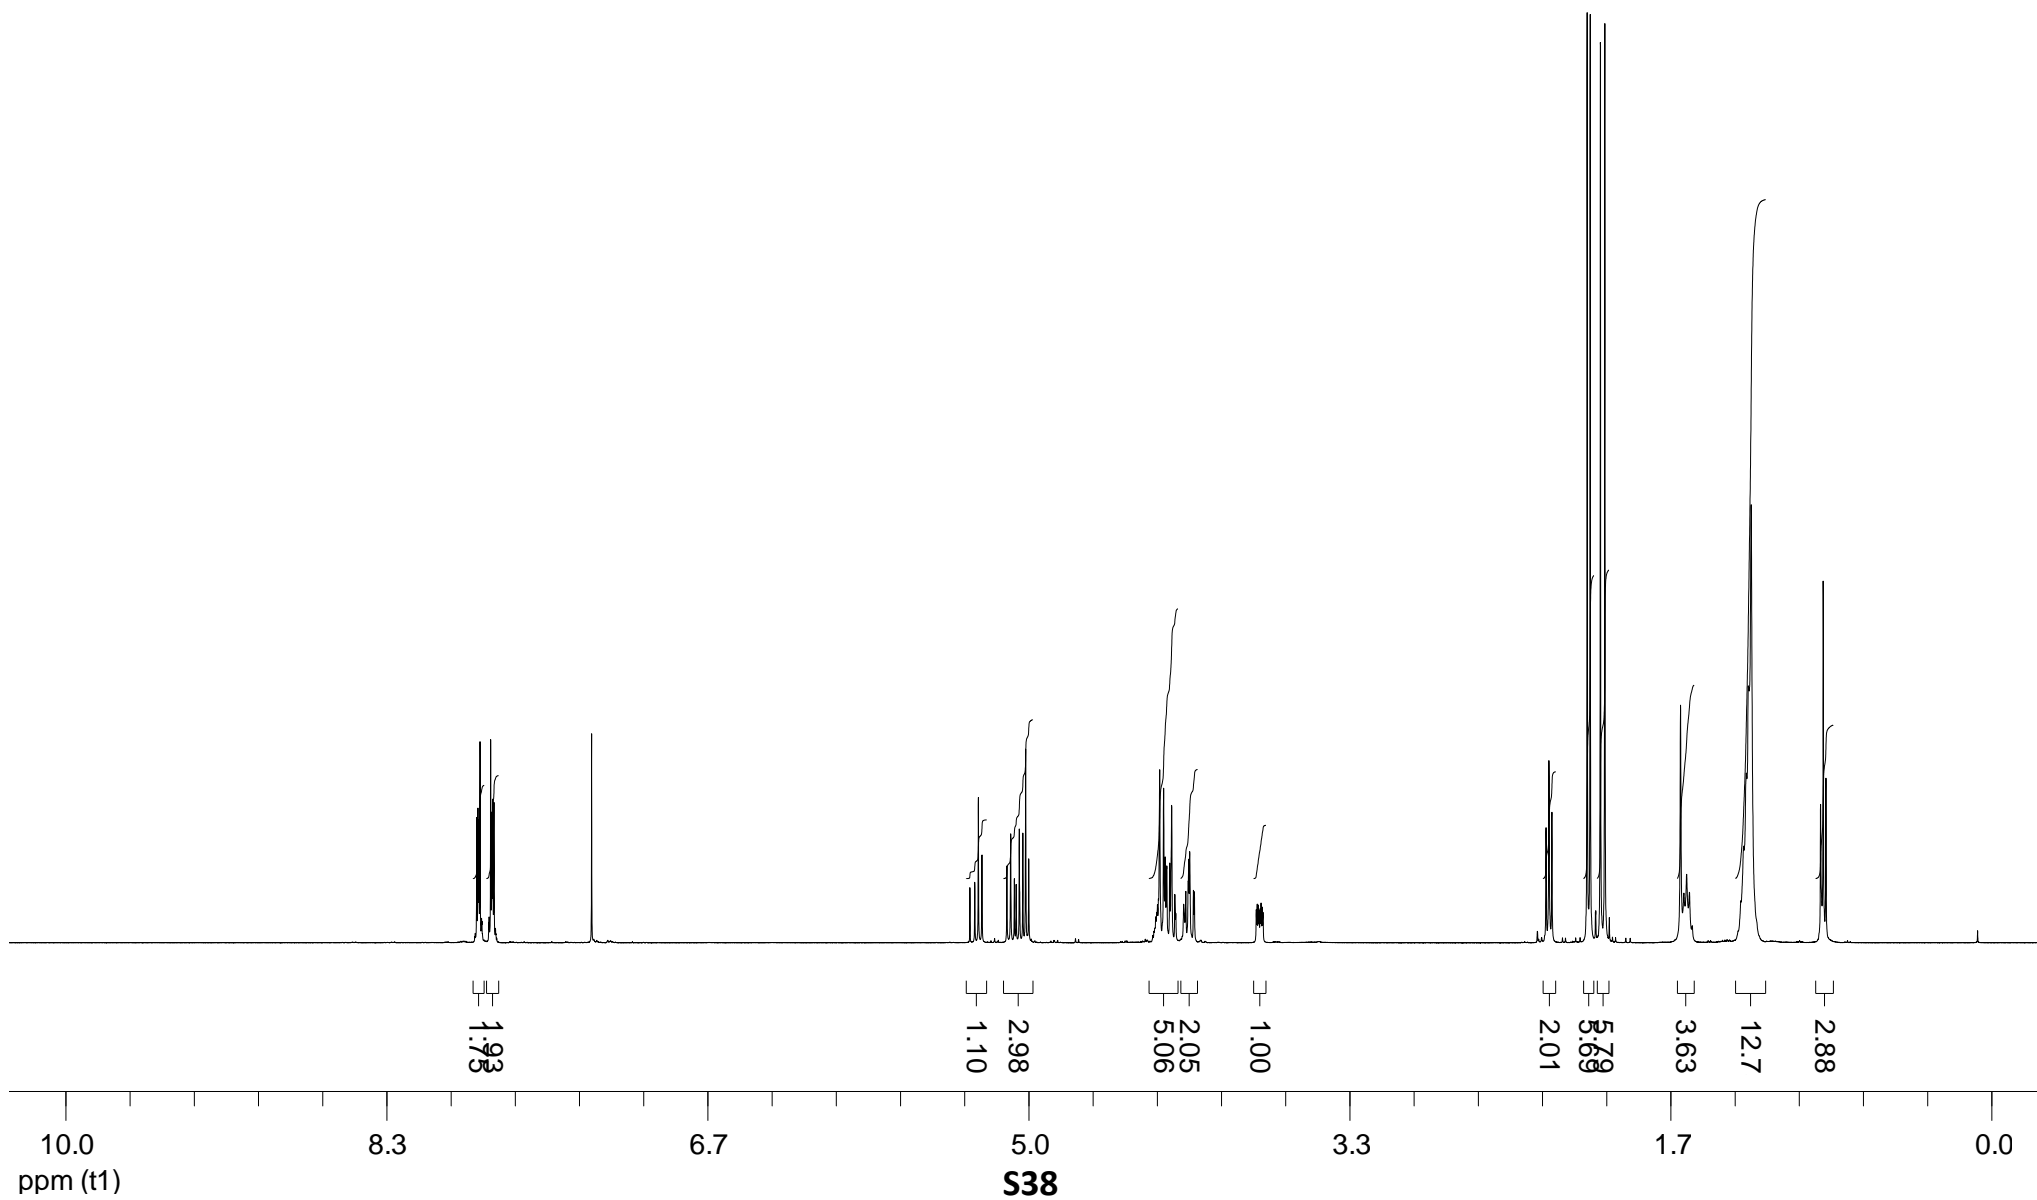

Compound 18

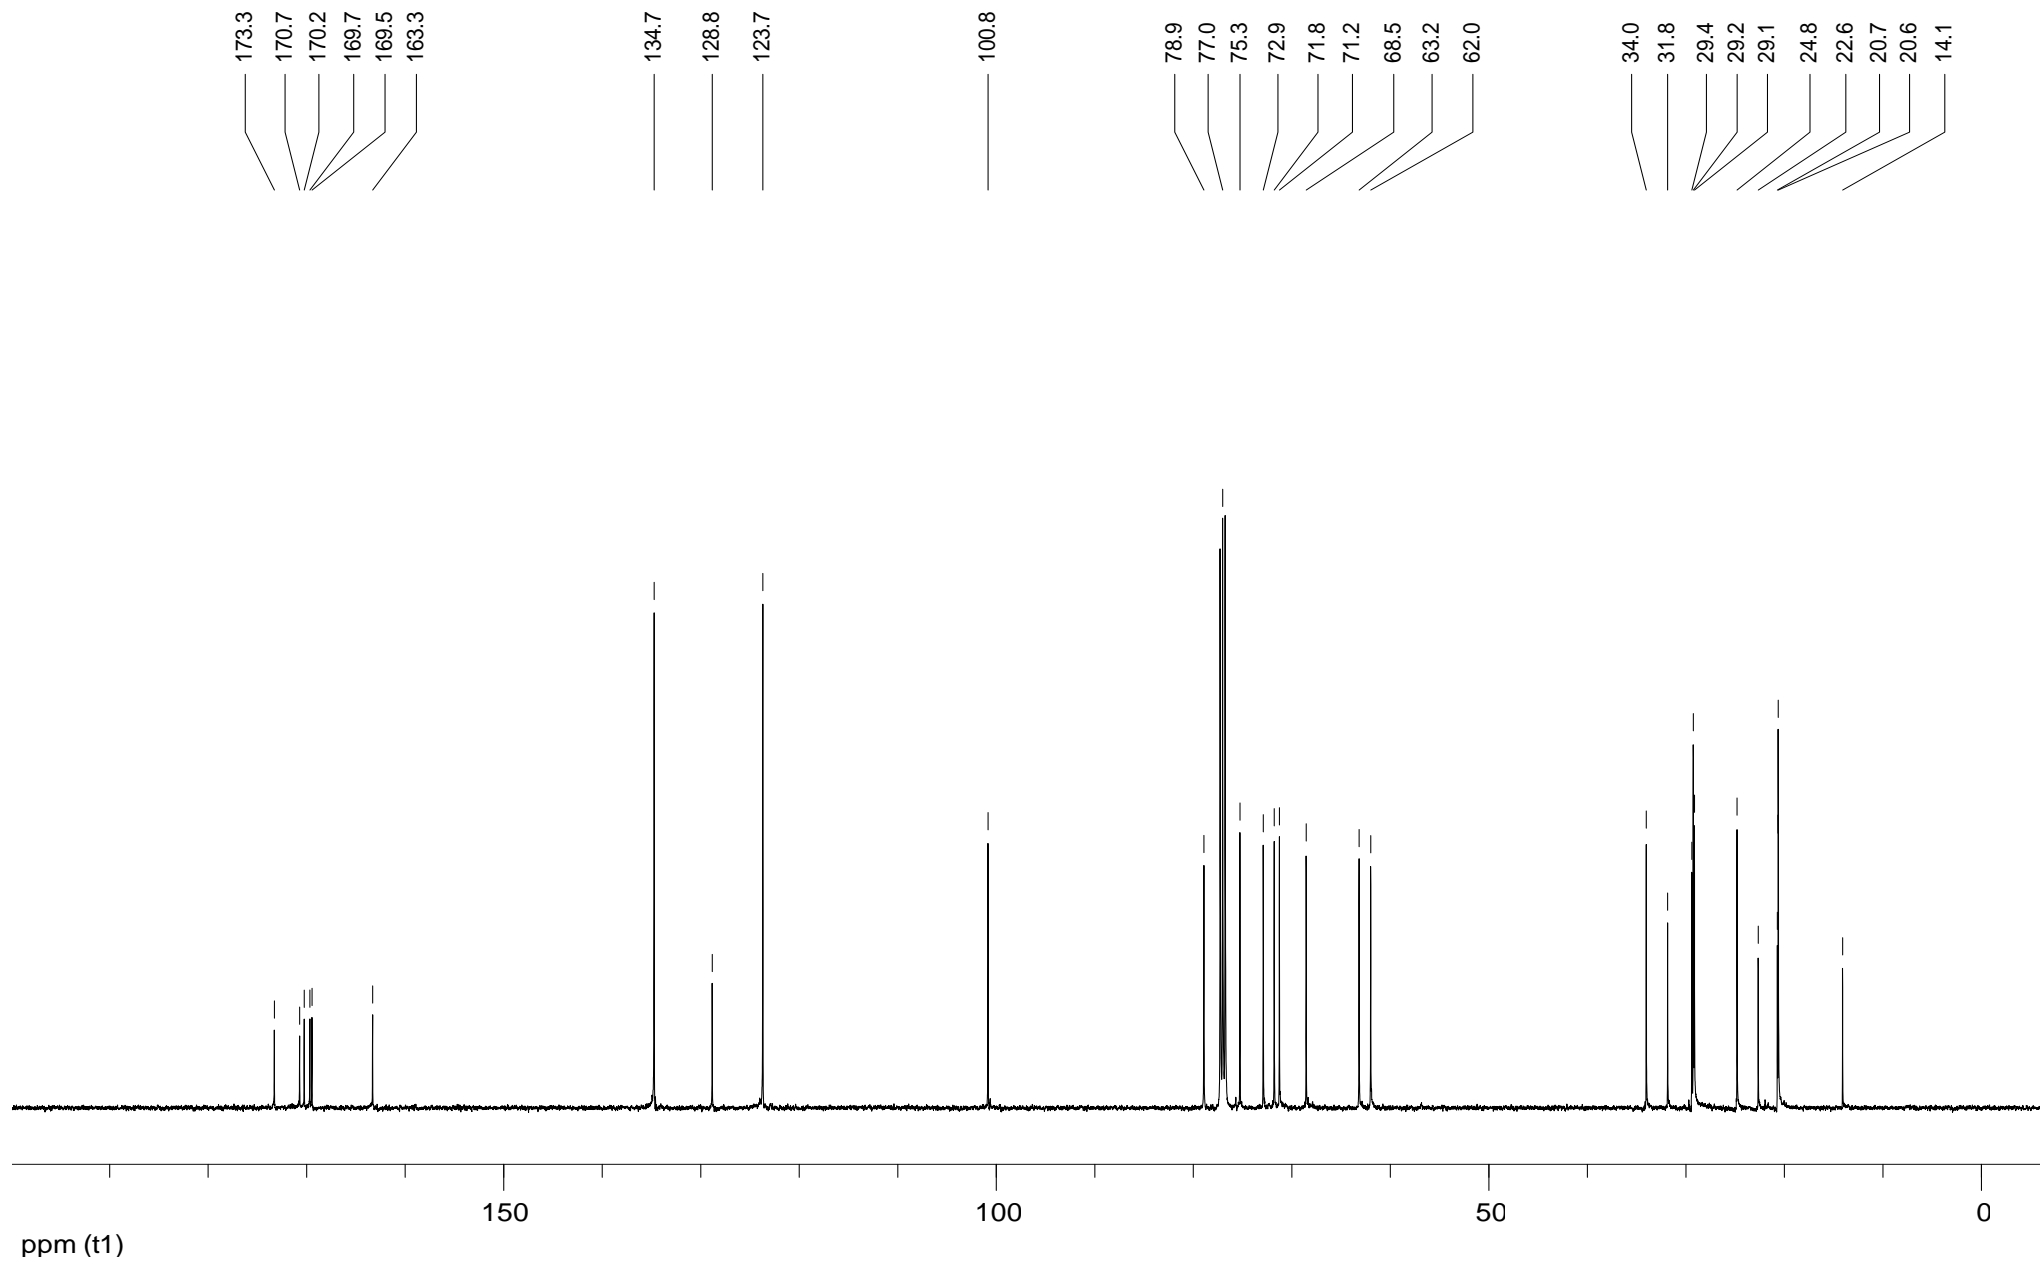



Compound 19

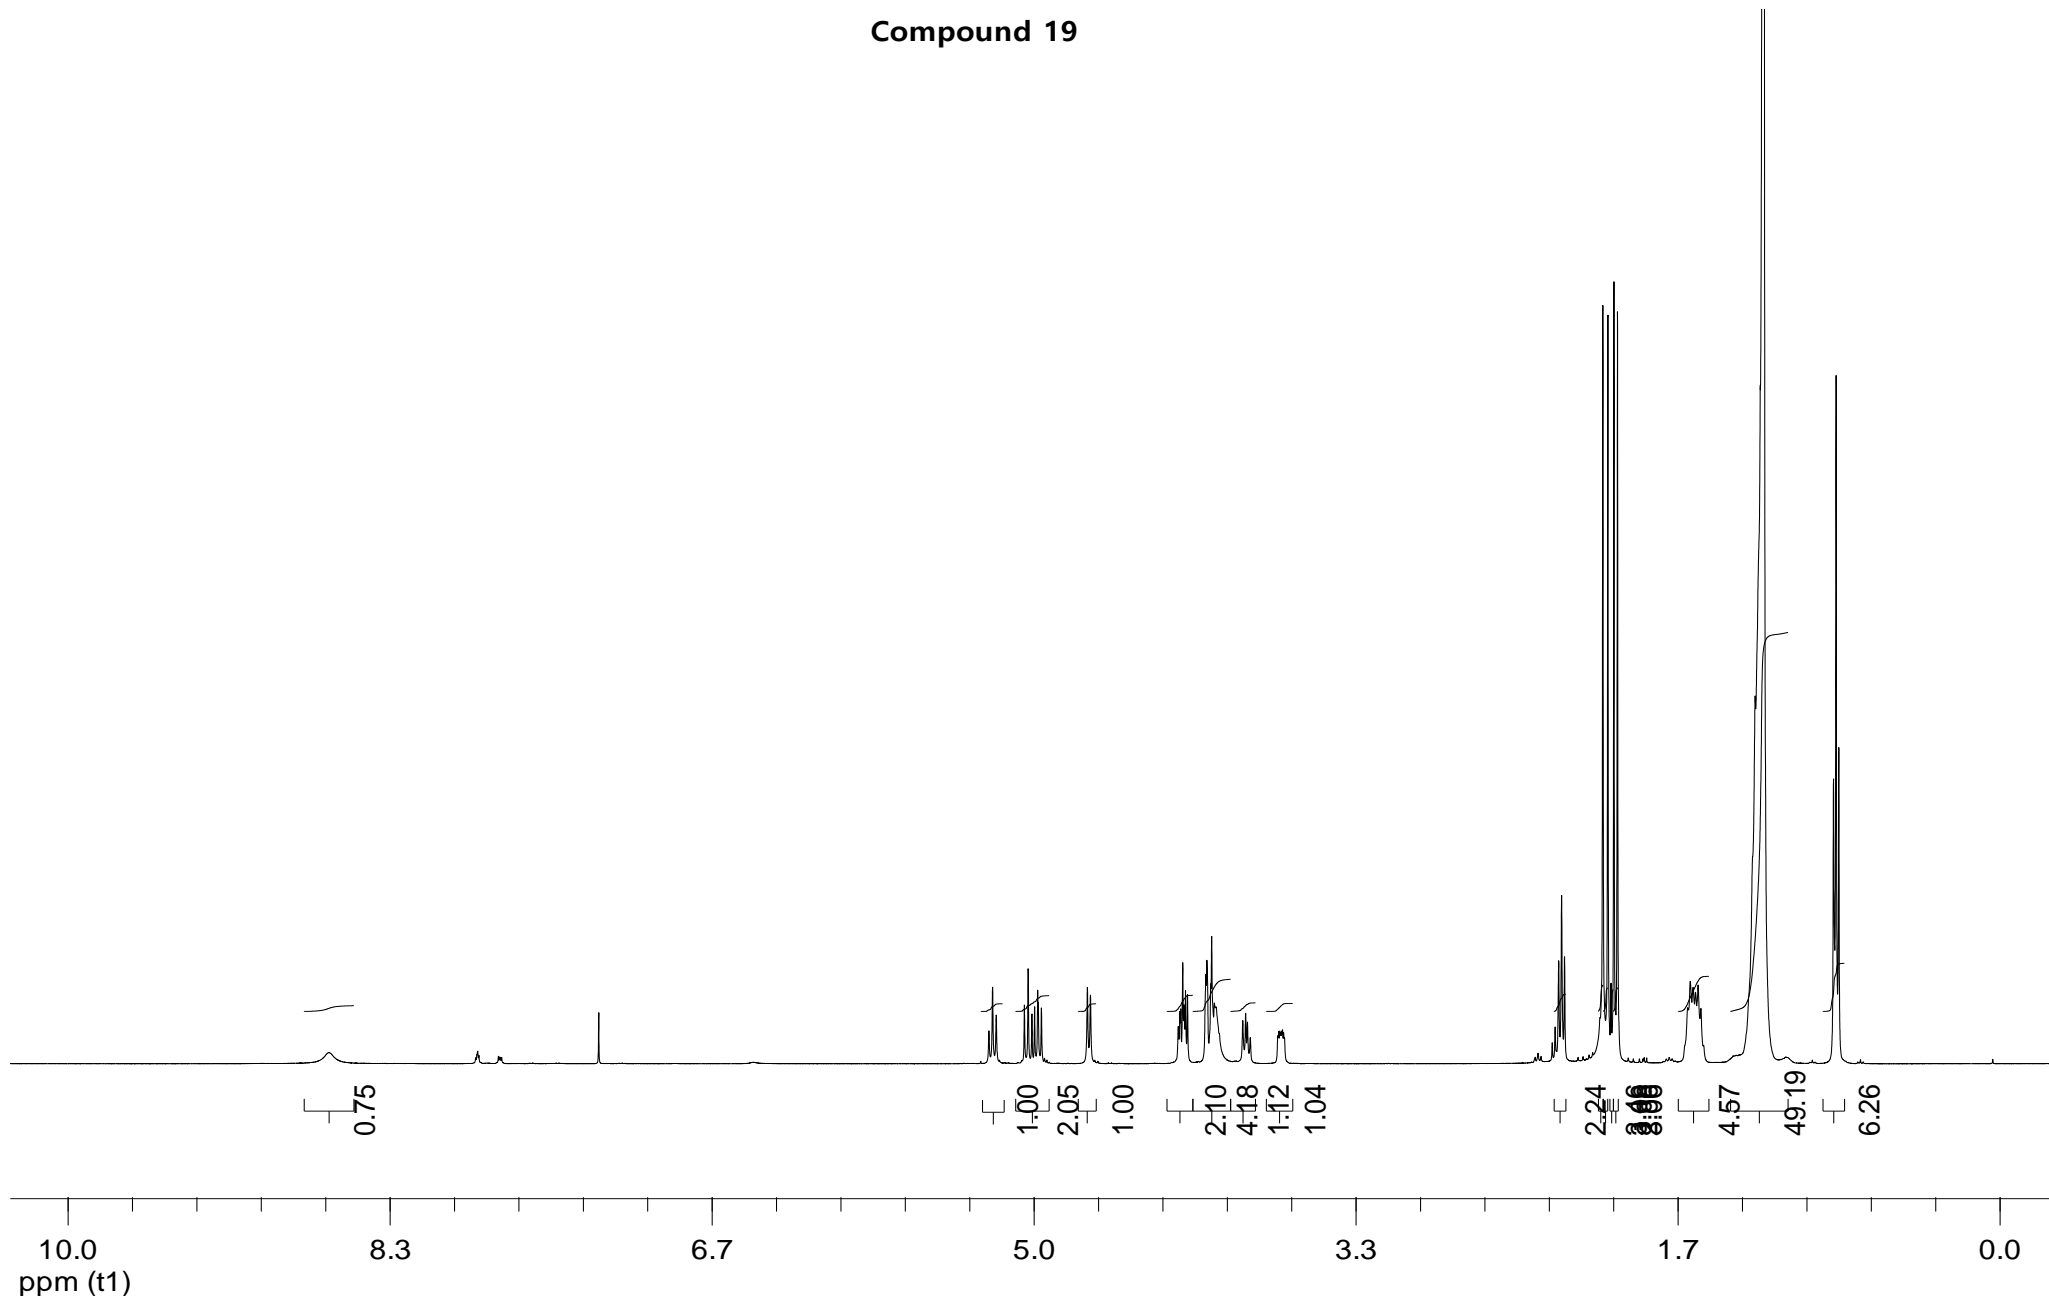

S40

Compound 19

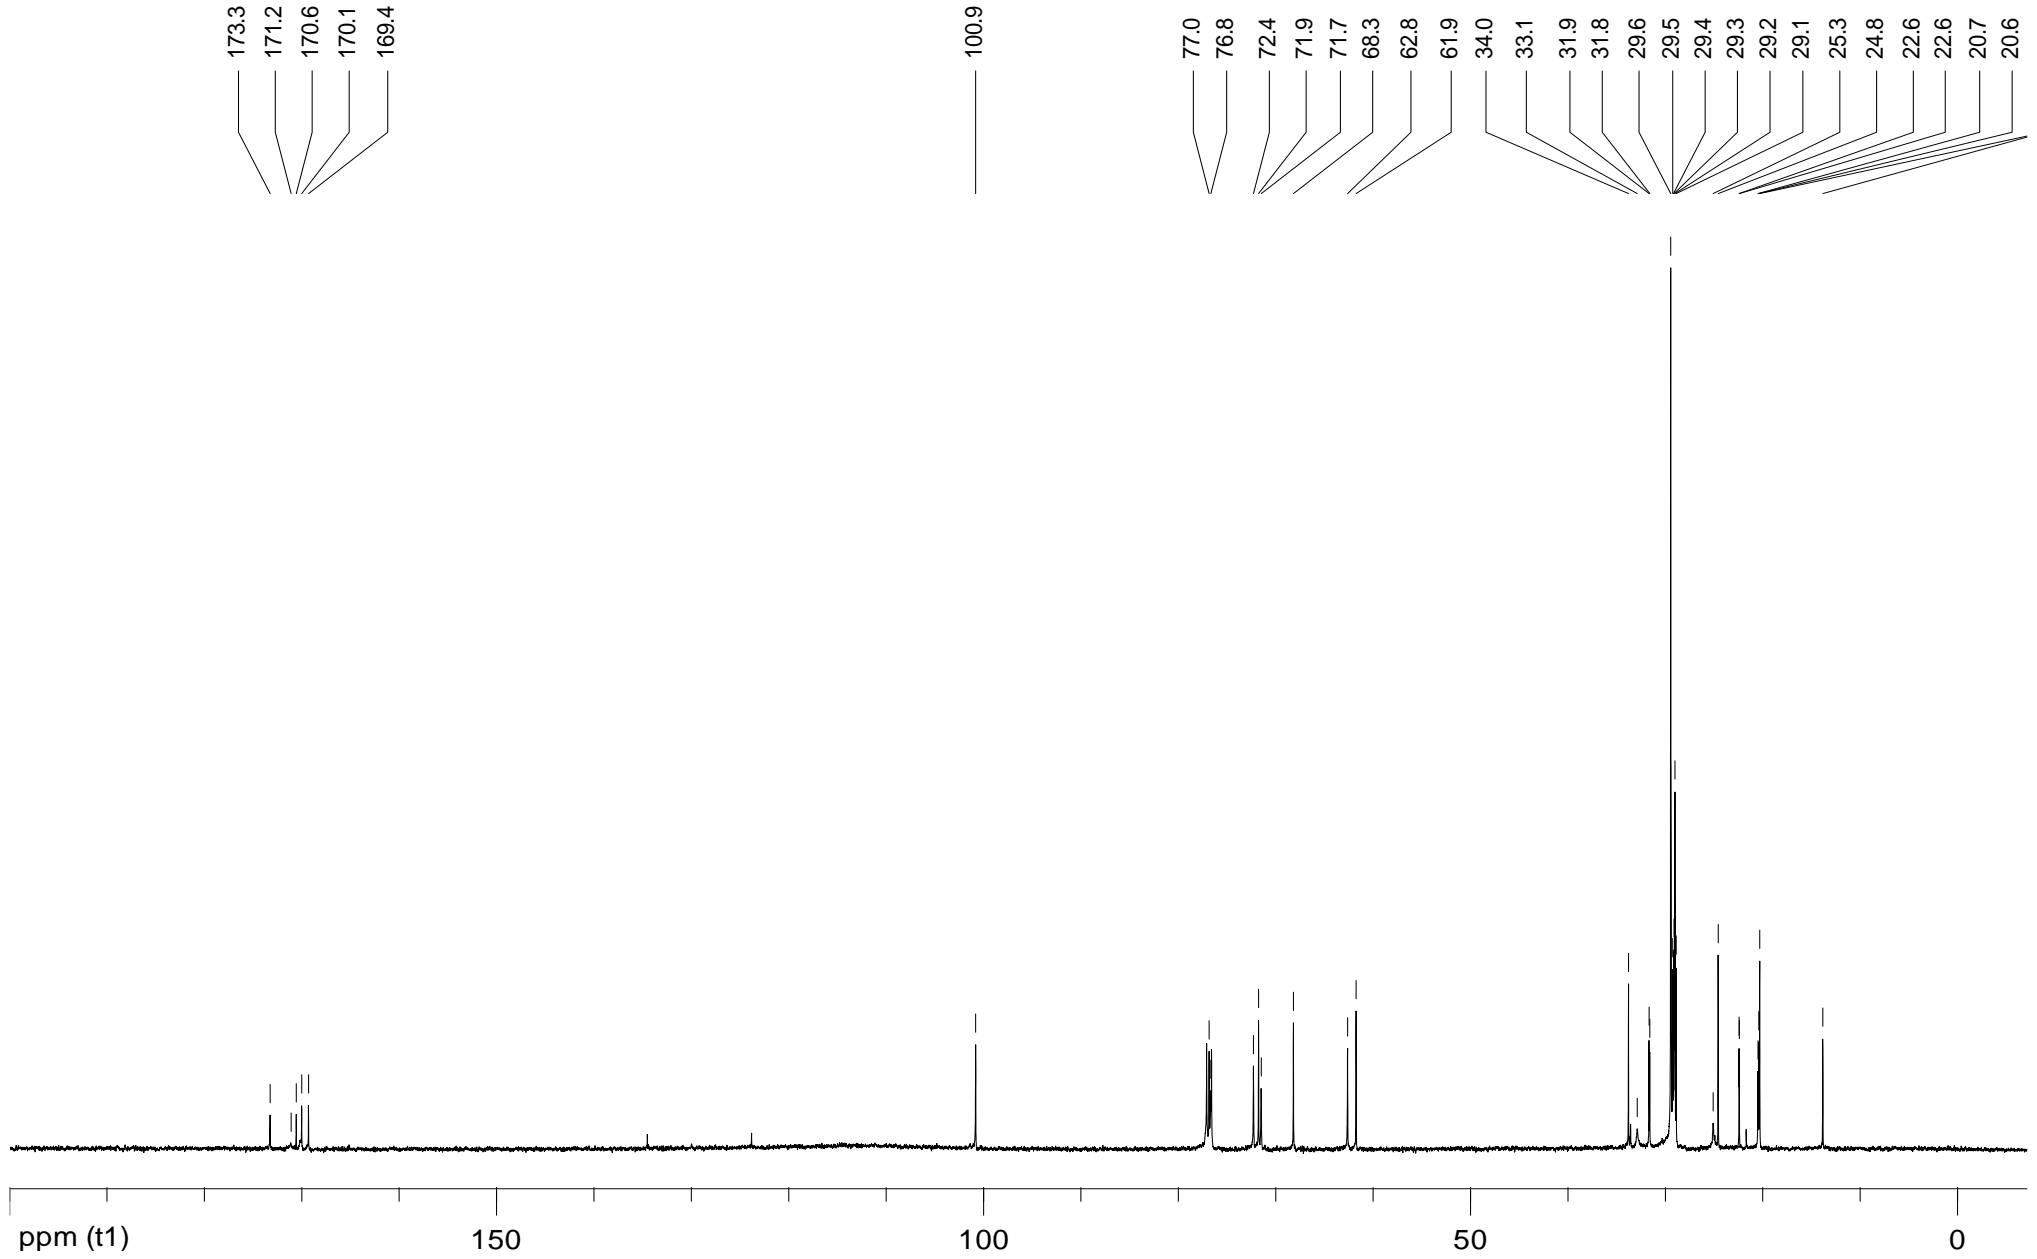

S41

Compound 20

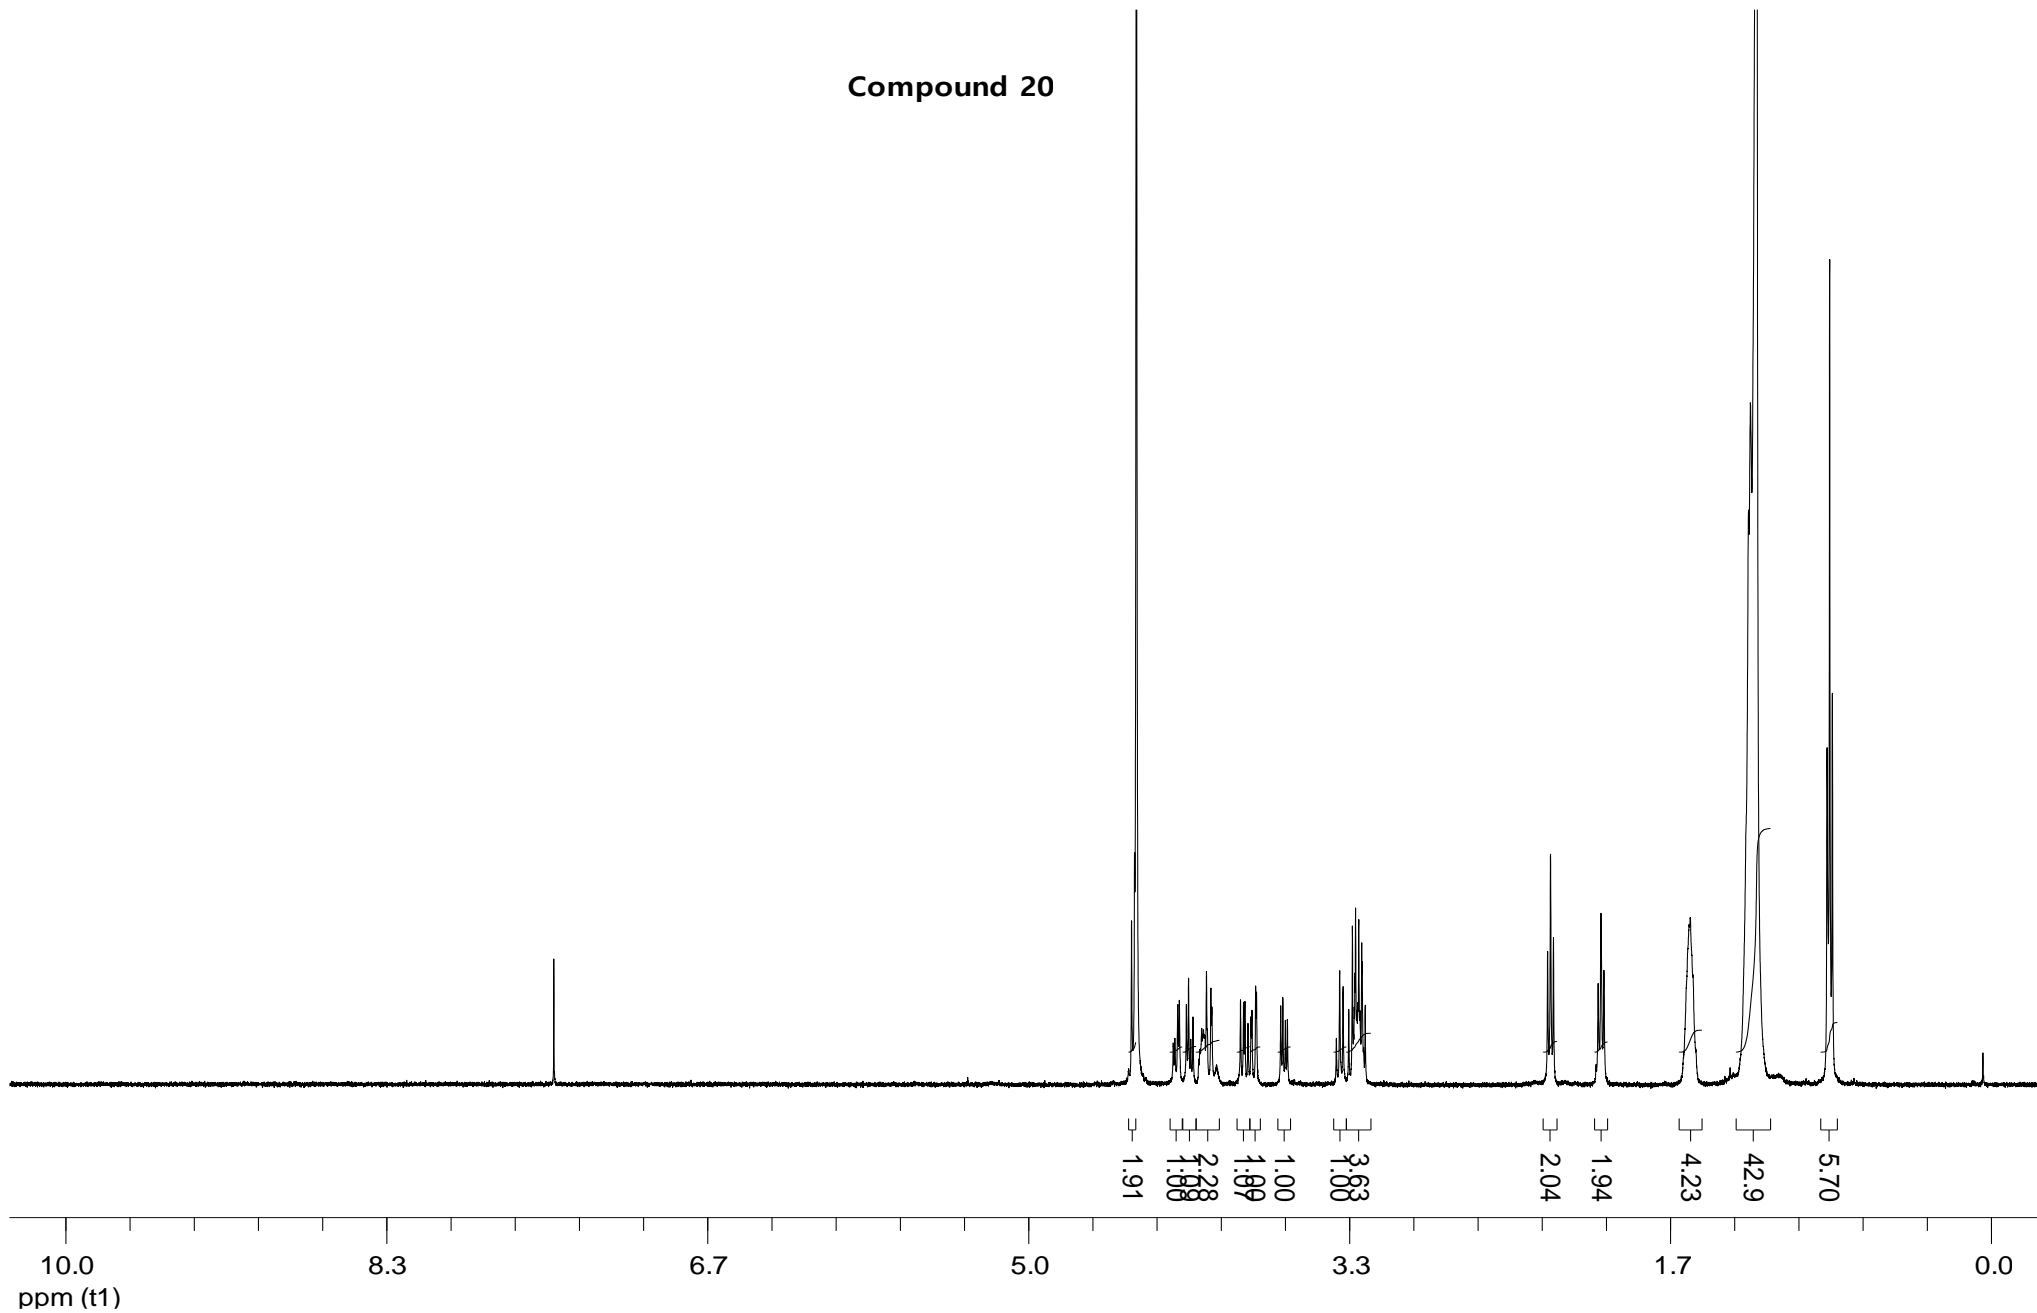

S42

Compound 20

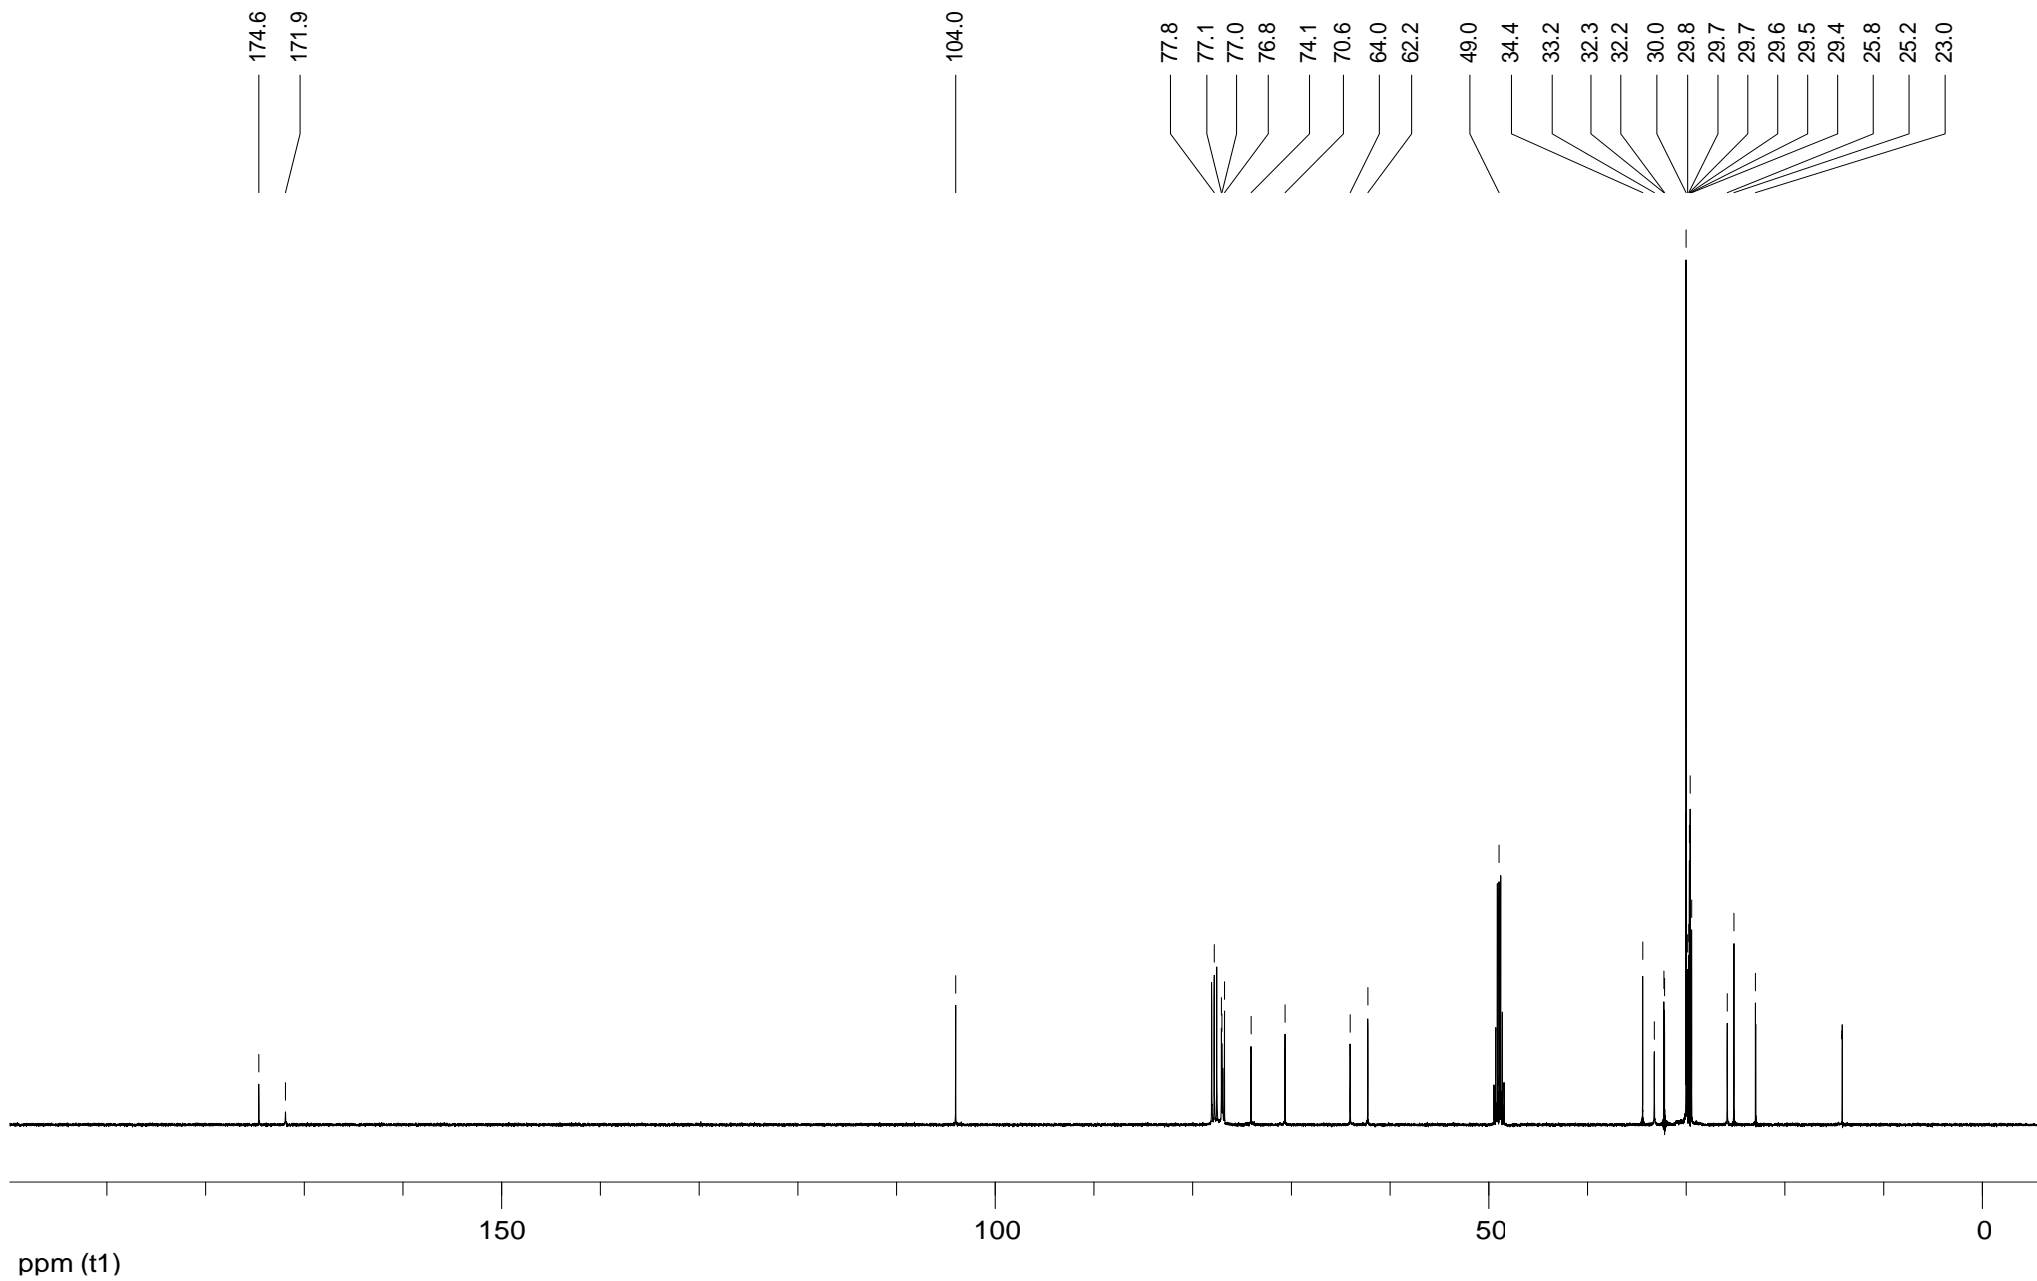

S43

Compound 21

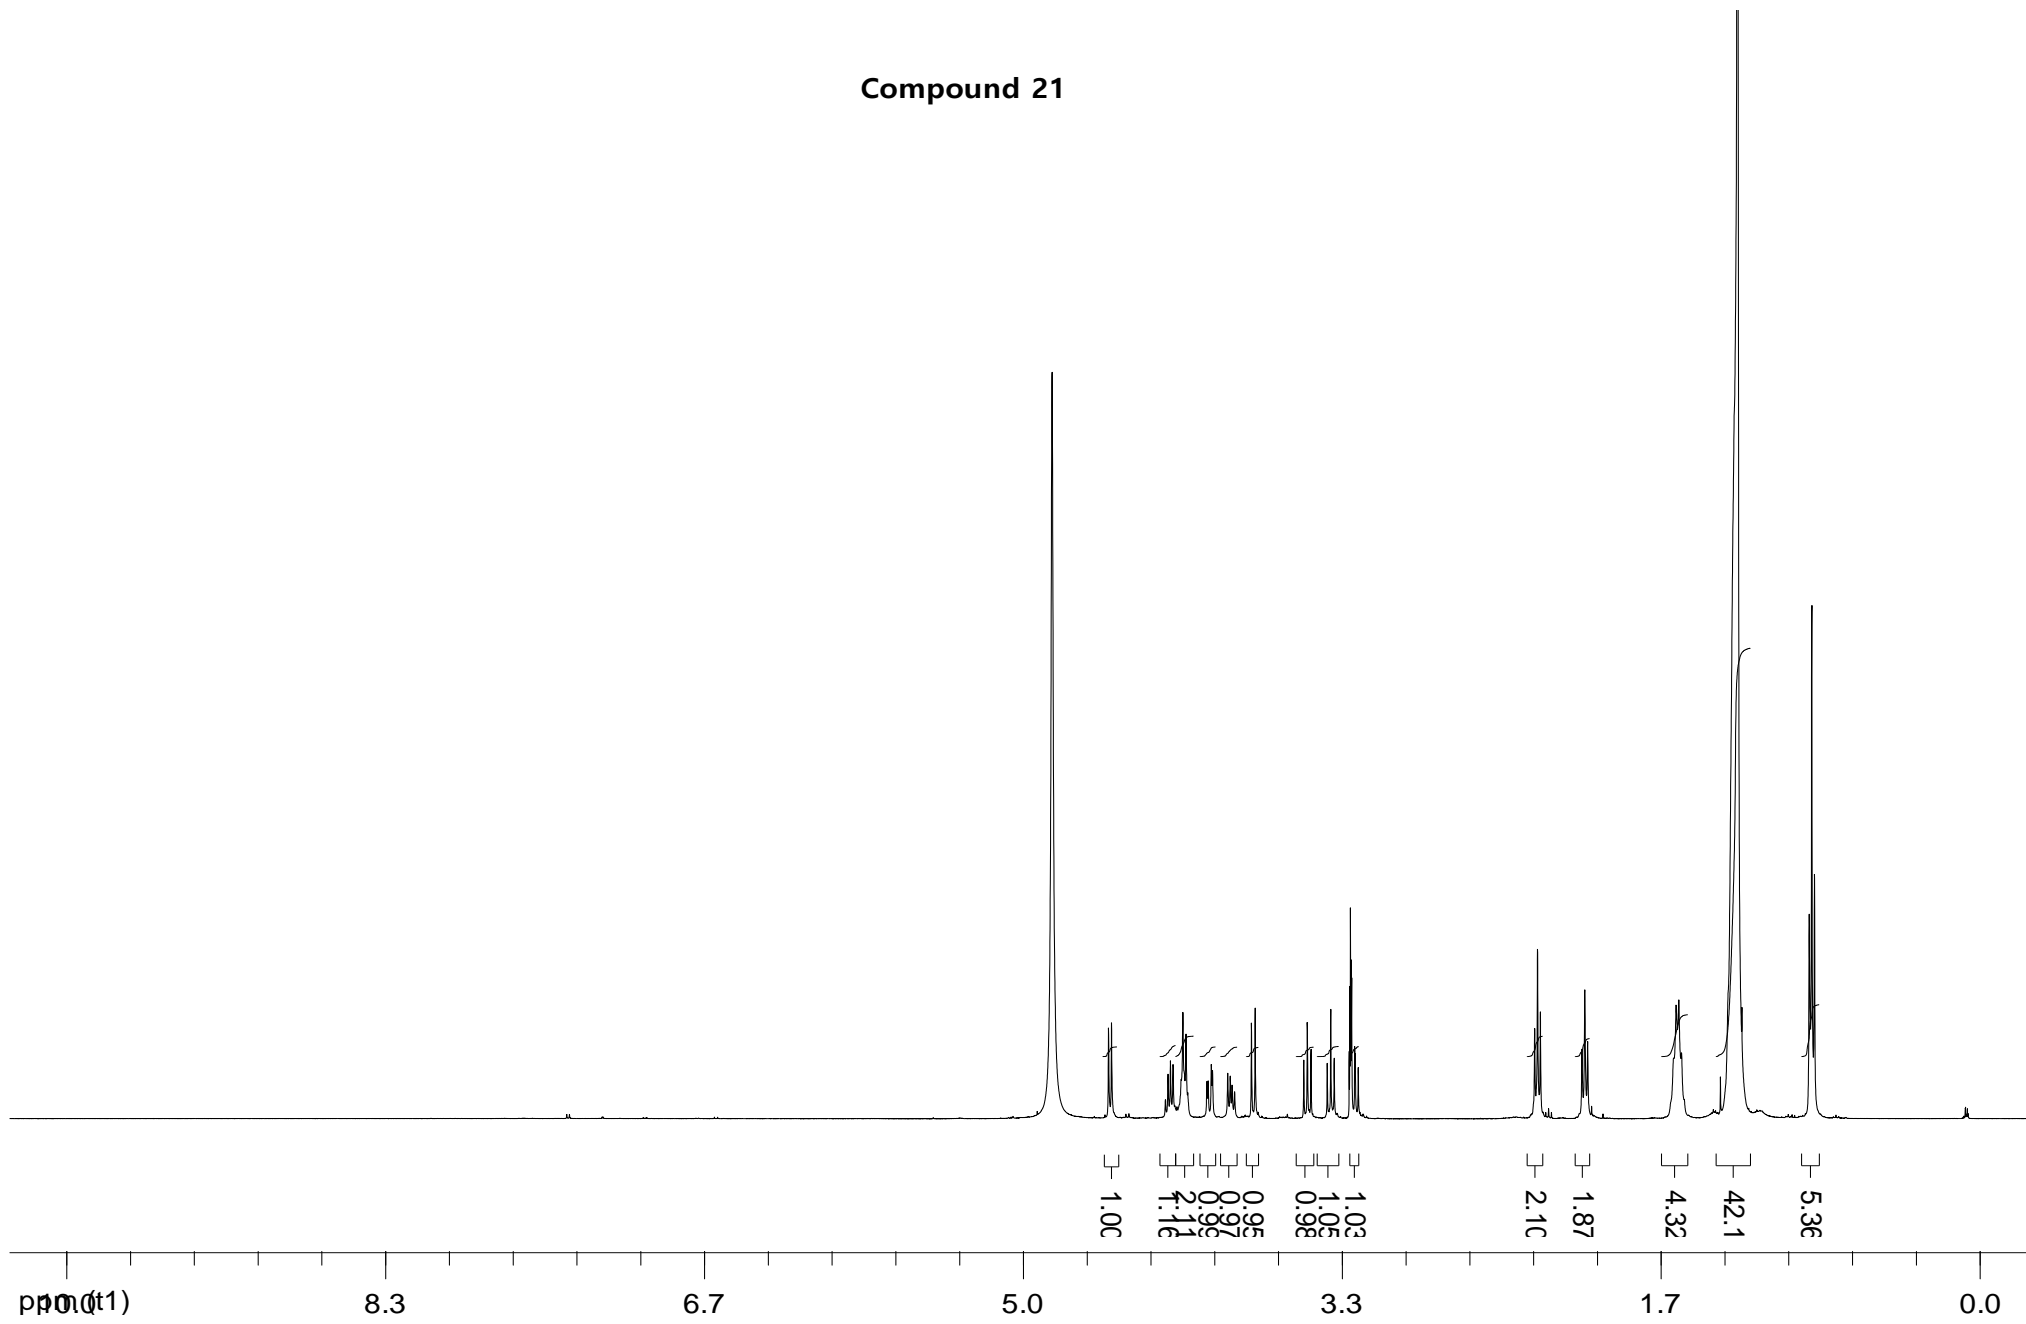

S44

Compound 21

175.2  
172.9  
172.5

104.8

77.6  
77.5  
77.3  
76.7  
74.8  
73.1  
64.9

49.0  
34.9  
33.7  
33.0  
30.8  
30.7  
30.6  
30.6  
30.4  
30.4  
30.2  
30.1  
26.6  
25.9  
23.7  
14.4

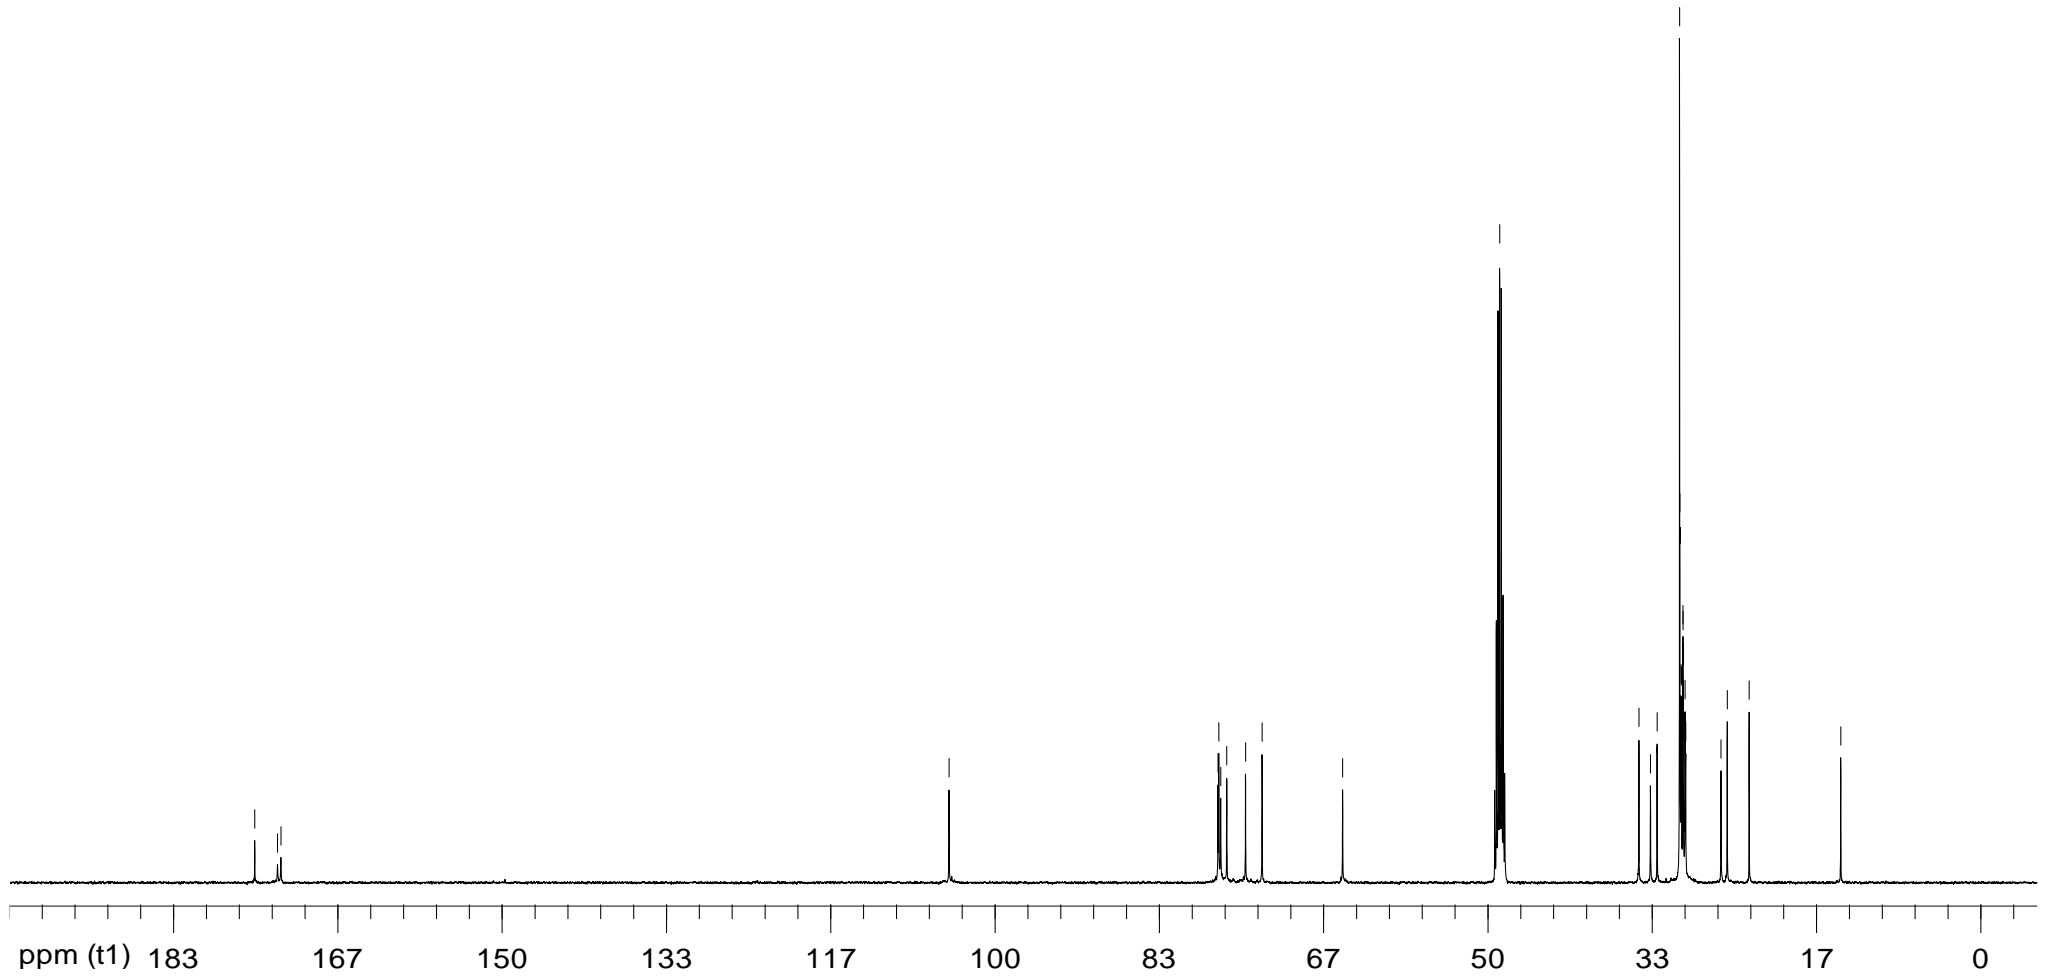

S45

1,3-di-O-decanoyl-2-O-(2',3',4',6'-tetra-O-acetyl-β-D-glucopyranosyl)-sn-glycerol

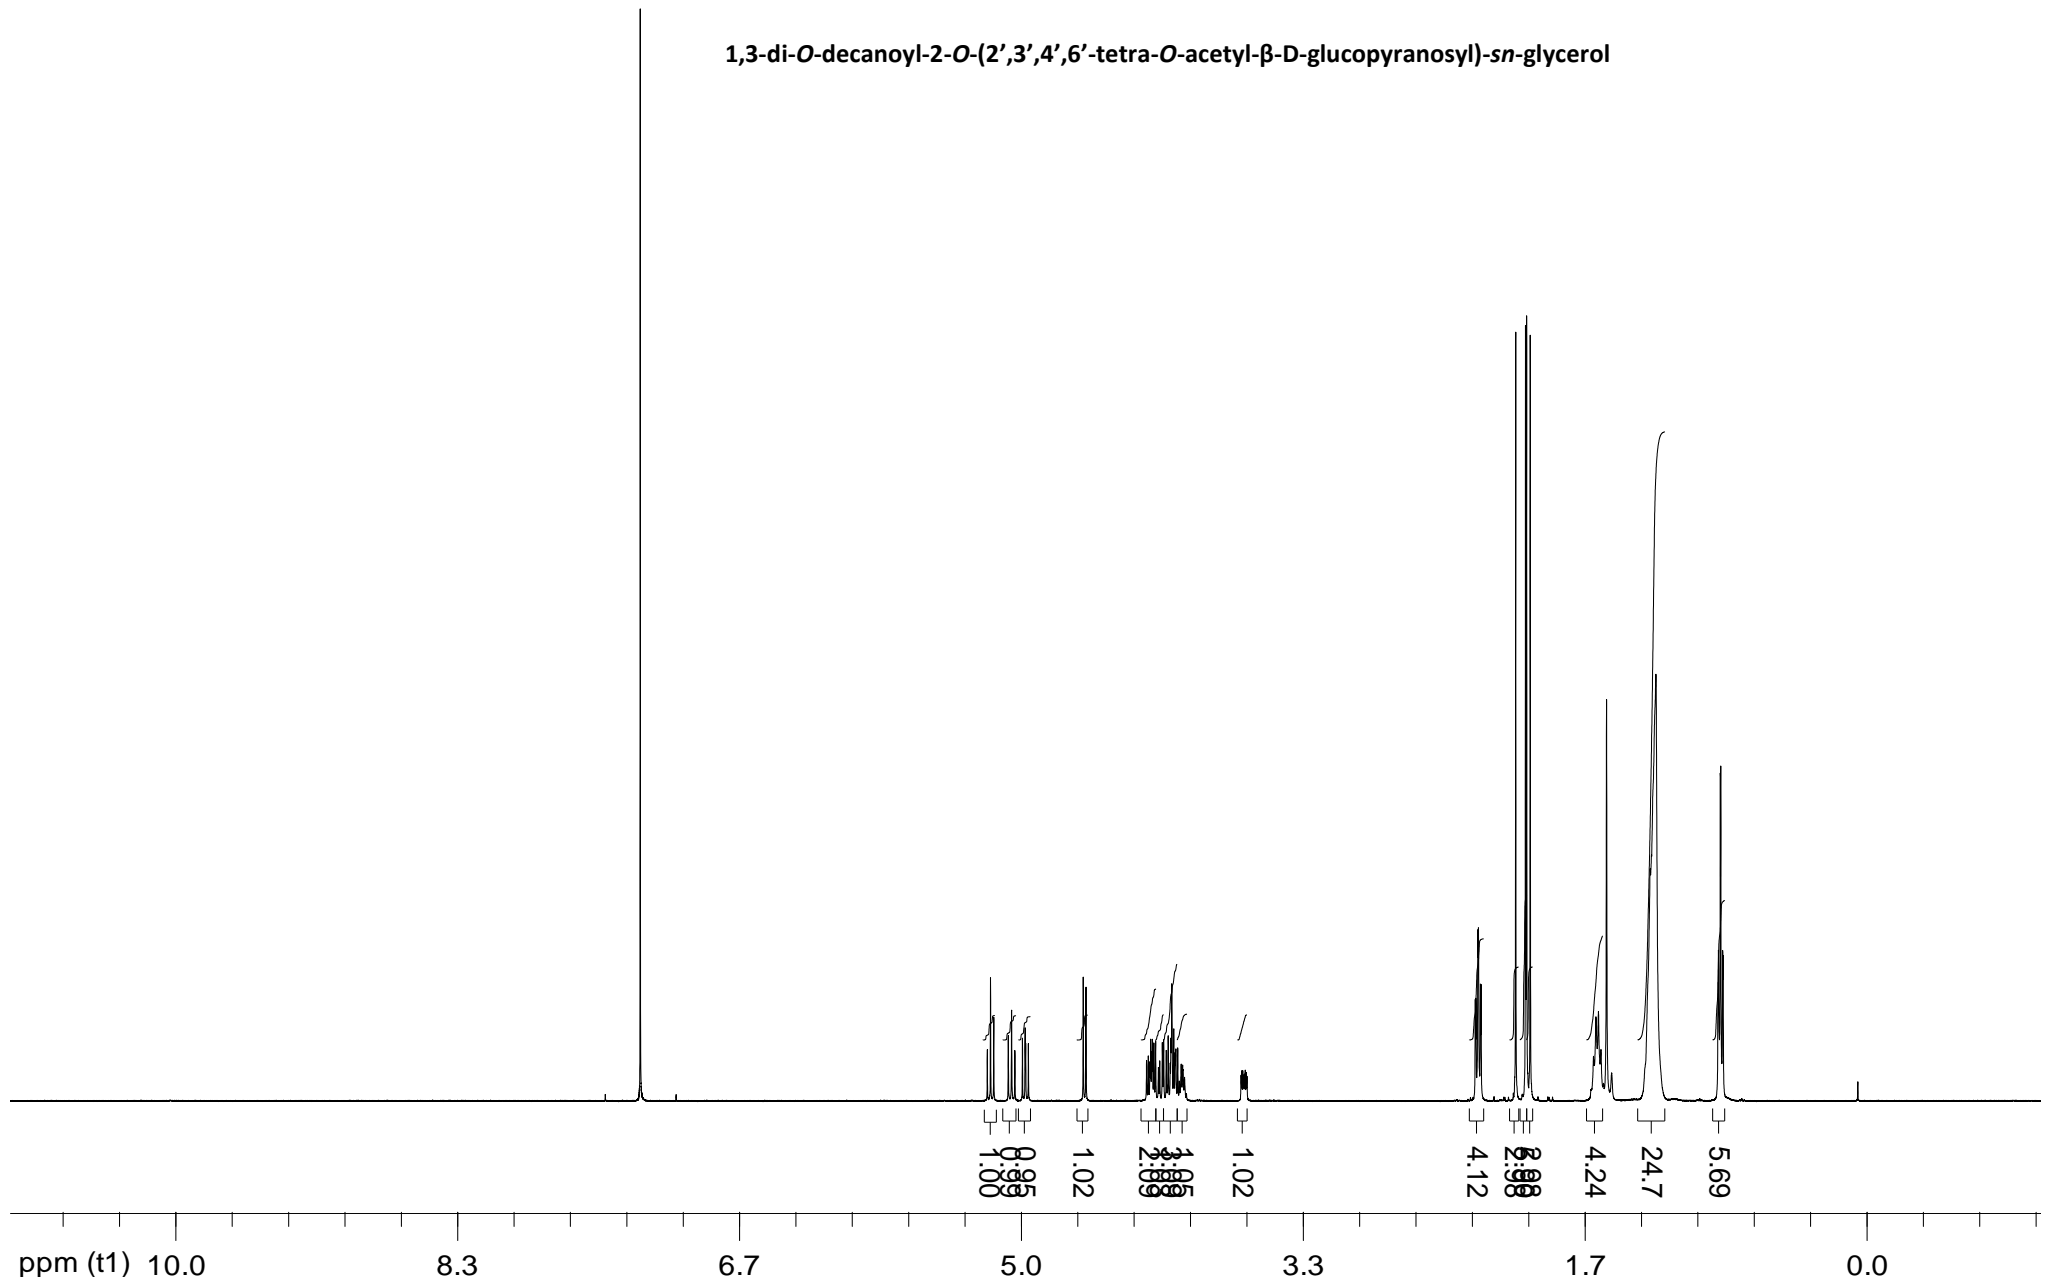

S46

1,3-di-O-decanoyl-2-O-(2',3',4',6'-tetra-O-acetyl-β-D-glucopyranosyl)-sn-glycerol

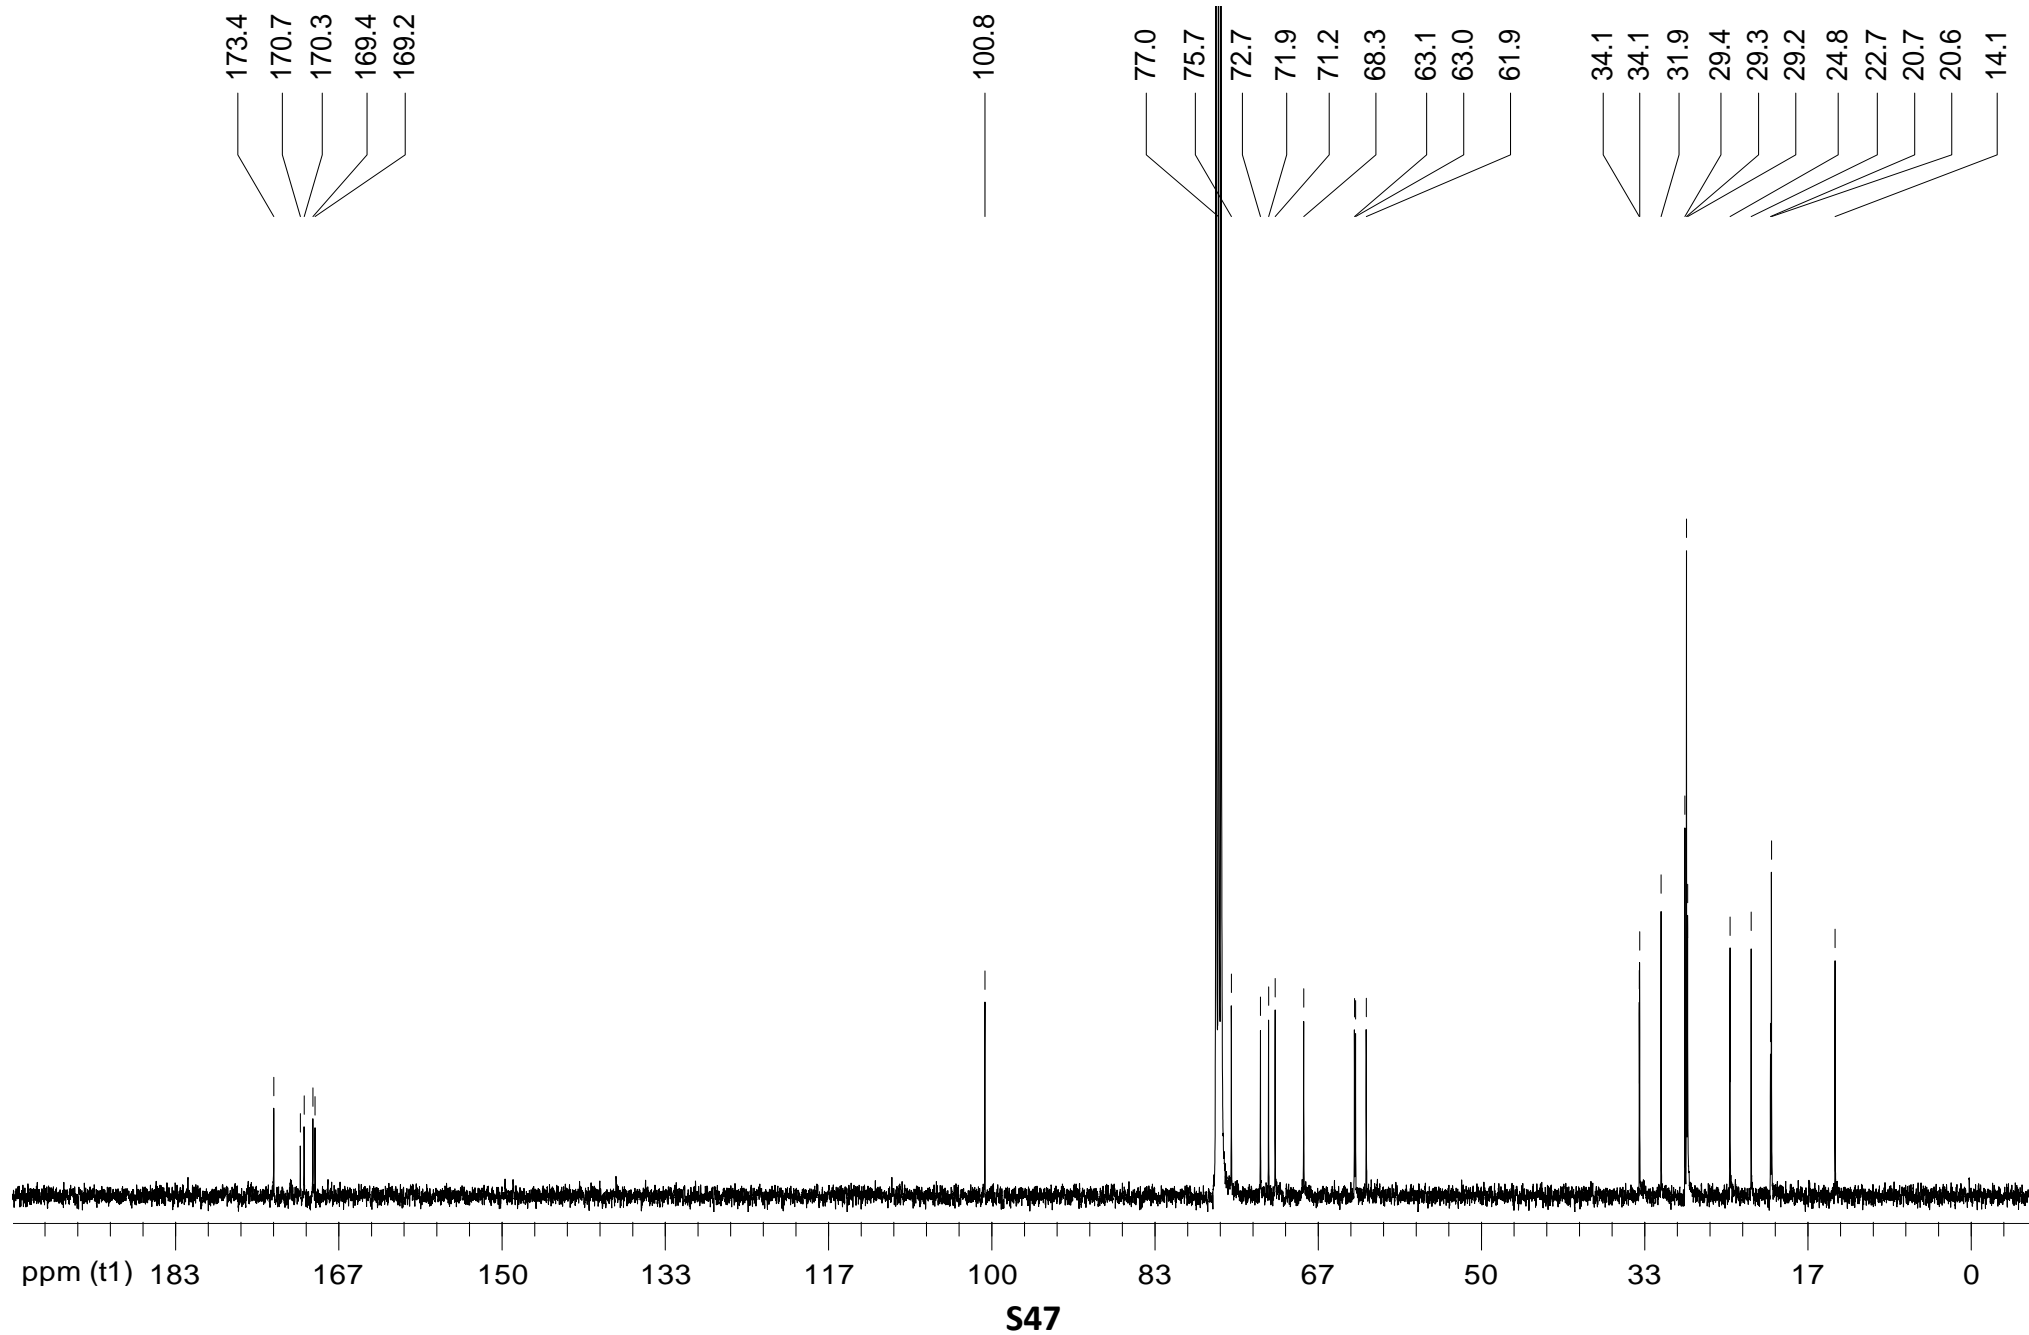

Supplement: d3ob00891f1.pdf [file d3ob00891f1.pdf]
